# Supplementary material for: A Neuroprotective Locus Modulates Ischemic Stroke Infarction Independent of Collateral Vessel Anatomy
Source: Front Neurosci. 2021 Aug 2;15:705160. doi: 10.3389/fnins.2021.705160 (PMC8366065; doi:10.3389/fnins.2021.705160)
Supplement: Supplementary file 3 [file Table_3.XLSX]

## Sheet: WSBvsB6.DEG.all
Chr.	Symbol	Description	Gene type	Log2FC	p value		total DEG	1716
				(fold change)			up-regulated	782
1	Gm8210	predicted pseudogene 8210 [Source:MGI Symbol;Acc:MGI:3643593]	processed_pseudogene	8.92649	1.47862e-13		down-regulated	934
	Catspere1	cation channel sperm associated auxiliary subunit epsilon 1 [Source:MGI Symbol;Acc:MGI:3647531]	unprocessed_pseudogene	8.66884	2.58037e-12
	Gm38286	predicted gene, 38286 [Source:MGI Symbol;Acc:MGI:5611514]	TEC	7.90164	1.07207e-09
	Tma7-ps	translational machinery associated 7 homolog (S. cerevisiae), pseudogene [Source:MGI Symbol;Acc:MGI:3705453]	processed_pseudogene	6.62761	4.65931e-56
	Gm29125	predicted gene 29125 [Source:MGI Symbol;Acc:MGI:5579831]	lincRNA	6.47045	7.04098e-07
	Gm19680	predicted gene, 19680 [Source:MGI Symbol;Acc:MGI:5011865]	processed_pseudogene	6.46025	5.44298e-06
	Gm4322	predicted gene 4322 [Source:MGI Symbol;Acc:MGI:3782503]	processed_pseudogene	6.18456	3.61286e-05
	Mael	maelstrom spermatogenic transposon silencer [Source:MGI Symbol;Acc:MGI:2138453]	protein_coding	5.03817	3.13599e-15
	Gm37531	predicted gene, 37531 [Source:MGI Symbol;Acc:MGI:5610759]	TEC	4.8234	0.000127814
	Gm5526	predicted pseudogene 5526 [Source:MGI Symbol;Acc:MGI:3643066]	processed_pseudogene	4.64191	1.7132e-55
	Gm3608	predicted gene 3608 [Source:MGI Symbol;Acc:MGI:3804932]	pseudogene	4.24485	4.76786e-43
	Gm10530	predicted gene 10530 [Source:MGI Symbol;Acc:MGI:3641765]	processed_transcript	3.96047	0.000642233
	Gstp-ps	glutathione S-transferase, pi, pseudogene [Source:MGI Symbol;Acc:MGI:3782108]	processed_pseudogene	3.94324	1.09043e-25
	Gm28438	predicted gene 28438 [Source:MGI Symbol;Acc:MGI:5579144]	unprocessed_pseudogene	3.43316	6.03087e-116
	Gm8010	predicted gene 8010 [Source:MGI Symbol;Acc:MGI:3648648]	unprocessed_pseudogene	3.22917	0.00113972
	9630010A21Rik	RIKEN cDNA 9630010A21 gene [Source:MGI Symbol;Acc:MGI:2442787]	TEC	2.9942	4.41671e-09
	Aox4	aldehyde oxidase 4 [Source:MGI Symbol;Acc:MGI:1919122]	protein_coding	2.36562	1.09707e-10
	Catspere2	catsper channel auxiliary subunit epsilon 2 [Source:MGI Symbol;Acc:MGI:5589632]	protein_coding	2.30861	1.18565e-19
	Gm16083	predicted gene 16083 [Source:MGI Symbol;Acc:MGI:3802163]	antisense	2.30519	0.00141209
	Mroh3	maestro heat-like repeat family member 3 [Source:MGI Symbol;Acc:MGI:1923672]	protein_coding	2.23539	0.00209203
	Gm19026	predicted gene, 19026 [Source:MGI Symbol;Acc:MGI:5011211]	processed_pseudogene	2.06871	4.96819e-05
	Gm28800	predicted gene 28800 [Source:MGI Symbol;Acc:MGI:5579506]	antisense	2.05201	5.10538e-15
	Crocc2	ciliary rootlet coiled-coil, rootletin family member 2 [Source:MGI Symbol;Acc:MGI:3045962]	protein_coding	1.78499	9.27553e-05
	Gm15832	predicted gene 15832 [Source:MGI Symbol;Acc:MGI:3834078]	processed_transcript	1.77883	2.70927e-11
	Dnah7a	dynein, axonemal, heavy chain 7A [Source:MGI Symbol;Acc:MGI:2685838]	protein_coding	1.55491	3.27837e-06
	Wdfy1	WD repeat and FYVE domain containing 1 [Source:MGI Symbol;Acc:MGI:1916618]	protein_coding	1.52684	1.18911e-31
	Gm28661	predicted gene 28661 [Source:MGI Symbol;Acc:MGI:5579367]	unprocessed_pseudogene	1.46708	4.13934e-18
	Mpp4	membrane protein, palmitoylated 4 (MAGUK p55 subfamily member 4) [Source:MGI Symbol;Acc:MGI:2386681]	protein_coding	1.39107	0.00376721
	Vash2	vasohibin 2 [Source:MGI Symbol;Acc:MGI:2444826]	protein_coding	1.1868	8.29272e-05
	Gm32391	predicted gene, 32391 [Source:MGI Symbol;Acc:MGI:5591550]	lincRNA	1.08643	0.00324211
	Gm28151	predicted gene 28151 [Source:MGI Symbol;Acc:MGI:5578857]	lincRNA	1.06072	0.000610464
	Aox1	aldehyde oxidase 1 [Source:MGI Symbol;Acc:MGI:88035]	protein_coding	1.05704	1.59474e-07
	5033417F24Rik	RIKEN cDNA 5033417F24 gene [Source:MGI Symbol;Acc:MGI:1923245]	antisense	1.03263	0.000154114
	Pm20d1	peptidase M20 domain containing 1 [Source:MGI Symbol;Acc:MGI:2442939]	protein_coding	1.0288	0.00124737
	Gm10222	predicted gene 10222 [Source:MGI Symbol;Acc:MGI:3642643]	unprocessed_pseudogene	1.01664	0.00282749
	Hibch	3-hydroxyisobutyryl-Coenzyme A hydrolase [Source:MGI Symbol;Acc:MGI:1923792]	protein_coding	0.955597	1.2106e-09
	Tnfrsf11a	tumor necrosis factor receptor superfamily, member 11a, NFKB activator [Source:MGI Symbol;Acc:MGI:1314891]	protein_coding	0.804387	0.000853587
	Gm20646	predicted gene 20646 [Source:MGI Symbol;Acc:MGI:5313093]	sense_overlapping	0.78674	0.00088246
	Gm16701	predicted gene, 16701 [Source:MGI Symbol;Acc:MGI:4439625]	lincRNA	0.71228	7.10862e-05
	1700019D03Rik	RIKEN cDNA 1700019D03 gene [Source:MGI Symbol;Acc:MGI:1914330]	protein_coding	0.697225	2.42747e-05
	Ccdc190	coiled-coil domain containing 190 [Source:MGI Symbol;Acc:MGI:1925715]	protein_coding	0.669434	0.00373119
	Tagln2	transgelin 2 [Source:MGI Symbol;Acc:MGI:1312985]	protein_coding	0.627916	0.00164092
	Scly	selenocysteine lyase [Source:MGI Symbol;Acc:MGI:1355310]	protein_coding	0.566248	0.000226325
	C130074G19Rik	RIKEN cDNA C130074G19 gene [Source:MGI Symbol;Acc:MGI:2444831]	protein_coding	0.520132	0.000448734
	Sdhaf4	succinate dehydrogenase complex assembly factor 4 [Source:MGI Symbol;Acc:MGI:1915252]	protein_coding	0.483304	0.00164024
	Dusp28	dual specificity phosphatase 28 [Source:MGI Symbol;Acc:MGI:1914696]	protein_coding	0.455204	0.00101252
	Smyd2	SET and MYND domain containing 2 [Source:MGI Symbol;Acc:MGI:1915889]	protein_coding	0.439598	0.00266704
	Gm28437	predicted gene 28437 [Source:MGI Symbol;Acc:MGI:5579143]	unprocessed_pseudogene	0.406893	0.00330981
	Atic	5-aminoimidazole-4-carboxamide ribonucleotide formyltransferase/IMP cyclohydrolase [Source:MGI Symbol;Acc:MGI:1351352]	protein_coding	0.398253	0.0038019
	Kcnj10	potassium inwardly-rectifying channel, subfamily J, member 10 [Source:MGI Symbol;Acc:MGI:1194504]	protein_coding	0.387592	0.000275523
	Capn2	calpain 2 [Source:MGI Symbol;Acc:MGI:88264]	protein_coding	0.370387	0.000107562
	Sdhc	succinate dehydrogenase complex, subunit C, integral membrane protein [Source:MGI Symbol;Acc:MGI:1913302]	protein_coding	0.311335	0.001771
	Lmbrd1	LMBR1 domain containing 1 [Source:MGI Symbol;Acc:MGI:1915671]	protein_coding	-0.252734	0.00405724
	Copa	coatomer protein complex subunit alpha [Source:MGI Symbol;Acc:MGI:1334462]	protein_coding	-0.268462	0.0014567
	Shisa4	shisa family member 4 [Source:MGI Symbol;Acc:MGI:1924802]	protein_coding	-0.293035	0.00394603
	Map4k4	mitogen-activated protein kinase kinase kinase kinase 4 [Source:MGI Symbol;Acc:MGI:1349394]	protein_coding	-0.296	0.00232996
	Atp1a2	ATPase, Na+/K+ transporting, alpha 2 polypeptide [Source:MGI Symbol;Acc:MGI:88106]	protein_coding	-0.304334	0.000532352
	Serpine2	serine (or cysteine) peptidase inhibitor, clade E, member 2 [Source:MGI Symbol;Acc:MGI:101780]	protein_coding	-0.306727	0.00248154
	Nfasc	neurofascin [Source:MGI Symbol;Acc:MGI:104753]	protein_coding	-0.315482	0.00286765
	Lancl1	LanC (bacterial lantibiotic synthetase component C)-like 1 [Source:MGI Symbol;Acc:MGI:1336997]	protein_coding	-0.316213	0.000470242
	Uhmk1	U2AF homology motif (UHM) kinase 1 [Source:MGI Symbol;Acc:MGI:1341908]	protein_coding	-0.319978	0.000251747
	Dcaf6	DDB1 and CUL4 associated factor 6 [Source:MGI Symbol;Acc:MGI:1921356]	protein_coding	-0.336054	0.00101128
	Fmn2	formin 2 [Source:MGI Symbol;Acc:MGI:1859252]	protein_coding	-0.338158	0.00164347
	Tns1	tensin 1 [Source:MGI Symbol;Acc:MGI:104552]	protein_coding	-0.36823	0.00203718
	Ppp1r12b	protein phosphatase 1, regulatory subunit 12B [Source:MGI Symbol;Acc:MGI:1916417]	protein_coding	-0.37965	0.000137587
	Cnst	consortin, connexin sorting protein [Source:MGI Symbol;Acc:MGI:2445141]	protein_coding	-0.381088	0.00277098
	Tnr	tenascin R [Source:MGI Symbol;Acc:MGI:99516]	protein_coding	-0.393446	0.000105342
	Nos1ap	nitric oxide synthase 1 (neuronal) adaptor protein [Source:MGI Symbol;Acc:MGI:1917979]	protein_coding	-0.396025	0.00321082
	Rabif	RAB interacting factor [Source:MGI Symbol;Acc:MGI:2138605]	protein_coding	-0.40307	0.000766585
	Ncstn	nicastrin [Source:MGI Symbol;Acc:MGI:1891700]	protein_coding	-0.431223	0.000143312
	Cacna1e	calcium channel, voltage-dependent, R type, alpha 1E subunit [Source:MGI Symbol;Acc:MGI:106217]	protein_coding	-0.460422	0.000176142
	Trak2	trafficking protein, kinesin binding 2 [Source:MGI Symbol;Acc:MGI:1918077]	protein_coding	-0.470016	3.94235e-06
	Cox5b	cytochrome c oxidase subunit 5B [Source:MGI Symbol;Acc:MGI:88475]	protein_coding	-0.470135	4.11721e-05
	Rims1	regulating synaptic membrane exocytosis 1 [Source:MGI Symbol;Acc:MGI:2152971]	protein_coding	-0.479216	4.9511e-05
	Rgs8	regulator of G-protein signaling 8 [Source:MGI Symbol;Acc:MGI:108408]	protein_coding	-0.479764	0.00024632
	Glul	glutamate-ammonia ligase (glutamine synthetase) [Source:MGI Symbol;Acc:MGI:95739]	protein_coding	-0.495029	8.37496e-09
	Gmppa	GDP-mannose pyrophosphorylase A [Source:MGI Symbol;Acc:MGI:1916330]	protein_coding	-0.500804	0.000180365
	Ptma	prothymosin alpha [Source:MGI Symbol;Acc:MGI:97803]	protein_coding	-0.509382	9.40604e-08
	Ccdc115	coiled-coil domain containing 115 [Source:MGI Symbol;Acc:MGI:1916918]	protein_coding	-0.523312	0.000893244
	Utp14b	UTP14B small subunit processome component [Source:MGI Symbol;Acc:MGI:2445092]	protein_coding	-0.543764	0.00380381
	Tcea1	transcription elongation factor A (SII) 1 [Source:MGI Symbol;Acc:MGI:1196624]	protein_coding	-0.562674	4.3826e-06
	Coq10b	coenzyme Q10B [Source:MGI Symbol;Acc:MGI:1915126]	protein_coding	-0.567949	0.000478563
	Dock10	dedicator of cytokinesis 10 [Source:MGI Symbol;Acc:MGI:2146320]	protein_coding	-0.582888	6.26139e-06
	Igfn1	immunoglobulin-like and fibronectin type III domain containing 1 [Source:MGI Symbol;Acc:MGI:3045352]	protein_coding	-0.583683	0.000487145
	Tfb2m	transcription factor B2, mitochondrial [Source:MGI Symbol;Acc:MGI:107937]	protein_coding	-0.594292	0.000396578
	Tmem63a	transmembrane protein 63a [Source:MGI Symbol;Acc:MGI:2384789]	protein_coding	-0.595652	0.000148566
	Per2	period circadian clock 2 [Source:MGI Symbol;Acc:MGI:1195265]	protein_coding	-0.621702	1.13146e-05
	Kcnk2	potassium channel, subfamily K, member 2 [Source:MGI Symbol;Acc:MGI:109366]	protein_coding	-0.646672	4.79023e-06
	Rnf149	ring finger protein 149 [Source:MGI Symbol;Acc:MGI:2677438]	protein_coding	-0.675367	5.46399e-05
	Ackr1	atypical chemokine receptor 1 (Duffy blood group) [Source:MGI Symbol;Acc:MGI:1097689]	protein_coding	-0.739891	4.84836e-05
	Nav1	neuron navigator 1 [Source:MGI Symbol;Acc:MGI:2183683]	protein_coding	-0.772671	2.8362e-09
	Cfh	complement component factor h [Source:MGI Symbol;Acc:MGI:88385]	protein_coding	-0.825317	2.06177e-05
	Fn1	fibronectin 1 [Source:MGI Symbol;Acc:MGI:95566]	protein_coding	-0.836981	3.47634e-07
	Fmo1	flavin containing monooxygenase 1 [Source:MGI Symbol;Acc:MGI:1310002]	protein_coding	-0.872868	3.3145e-05
	Ppp1r15b	protein phosphatase 1, regulatory subunit 15B [Source:MGI Symbol;Acc:MGI:2444211]	protein_coding	-0.891732	9.72079e-14
	Ints7	integrator complex subunit 7 [Source:MGI Symbol;Acc:MGI:1924315]	protein_coding	-0.917206	2.58674e-11
	Ptgs2	prostaglandin-endoperoxide synthase 2 [Source:MGI Symbol;Acc:MGI:97798]	protein_coding	-0.949507	7.51113e-06
	Hjurp	Holliday junction recognition protein [Source:MGI Symbol;Acc:MGI:2685821]	protein_coding	-0.994157	2.77509e-15
	Ddr2	discoidin domain receptor family, member 2 [Source:MGI Symbol;Acc:MGI:1345277]	protein_coding	-1.01167	4.16222e-05
	Rnasel	ribonuclease L (2', 5'-oligoisoadenylate synthetase-dependent) [Source:MGI Symbol;Acc:MGI:1098272]	protein_coding	-1.07615	1.26609e-05
	Nvl	nuclear VCP-like [Source:MGI Symbol;Acc:MGI:1914709]	protein_coding	-1.0867	1.69176e-18
	D2hgdh	D-2-hydroxyglutarate dehydrogenase [Source:MGI Symbol;Acc:MGI:2138209]	protein_coding	-1.11123	5.73341e-07
	Etnk2	ethanolamine kinase 2 [Source:MGI Symbol;Acc:MGI:2443760]	protein_coding	-1.126	1.65111e-07
	G0s2	G0/G1 switch gene 2 [Source:MGI Symbol;Acc:MGI:1316737]	protein_coding	-1.1795	8.53271e-05
	Cd84	CD84 antigen [Source:MGI Symbol;Acc:MGI:1336885]	protein_coding	-1.19646	0.00249695
	AA986860	expressed sequence AA986860 [Source:MGI Symbol;Acc:MGI:2138143]	protein_coding	-1.23431	0.00337097
	Gm37069	predicted gene, 37069 [Source:MGI Symbol;Acc:MGI:5610297]	TEC	-1.37233	0.000309908
	Teddm2	transmembrane epididymal family member 2 [Source:MGI Symbol;Acc:MGI:1923273]	protein_coding	-1.48111	0.000260686
	Slc23a3	solute carrier family 23 (nucleobase transporters), member 3 [Source:MGI Symbol;Acc:MGI:104516]	protein_coding	-1.65271	0.00318732
	Srp9	signal recognition particle 9 [Source:MGI Symbol;Acc:MGI:1350930]	protein_coding	-1.67852	9.96362e-48
	Fcgr3	Fc receptor, IgG, low affinity III [Source:MGI Symbol;Acc:MGI:95500]	protein_coding	-1.72768	4.69202e-15
	Fmo2	flavin containing monooxygenase 2 [Source:MGI Symbol;Acc:MGI:1916776]	protein_coding	-1.87649	0.00142825
	Steap3	STEAP family member 3 [Source:MGI Symbol;Acc:MGI:1915678]	protein_coding	-1.918	1.11242e-12
	Adamts4	a disintegrin-like and metallopeptidase (reprolysin type) with thrombospondin type 1 motif, 4 [Source:MGI Symbol;Acc:MGI:1339949]	protein_coding	-2.009	5.89774e-22
	Gas5	growth arrest specific 5 [Source:MGI Symbol;Acc:MGI:95659]	processed_transcript	-2.1107	2.70492e-52
	D230017M19Rik	RIKEN cDNA D230017M19 gene [Source:MGI Symbol;Acc:MGI:2445071]	lincRNA	-2.8405	4.49352e-11
	A630001G21Rik	RIKEN cDNA A630001G21 gene [Source:MGI Symbol;Acc:MGI:2443131]	protein_coding	-2.88115	0.0024947
	Tnni1	troponin I, skeletal, slow 1 [Source:MGI Symbol;Acc:MGI:105073]	protein_coding	-3.1171	4.66381e-13
	Gm16701	predicted gene, 16701 [Source:MGI Symbol;Acc:MGI:4439625]	lincRNA	-3.53968	0.00058705
	Gm37233	predicted gene, 37233 [Source:MGI Symbol;Acc:MGI:5610461]	lincRNA	-3.59447	2.2663e-07
	Gm31728	predicted gene, 31728 [Source:MGI Symbol;Acc:MGI:5590887]	antisense	-5.49041	0.000468431
	Mndal	myeloid nuclear differentiation antigen like [Source:MGI Symbol;Acc:MGI:3780953]	protein_coding	-5.62845	4.15608e-05
	Gm3052	predicted gene 3052 [Source:MGI Symbol;Acc:MGI:3781230]	transcribed_processed_pseudogene	-7.30598	3.95987e-08
	Myoc	myocilin [Source:MGI Symbol;Acc:MGI:1202864]	protein_coding	-8.05907	7.64432e-45
2	Gm14414	predicted gene 14414 [Source:MGI Symbol;Acc:MGI:3652253]	processed_pseudogene	7.67	3.2481e-09
	Rps15a-ps7	ribosomal protein S15A, pseudogene 7 [Source:MGI Symbol;Acc:MGI:3650538]	processed_pseudogene	7.60472	1.26399e-47
	Gm13736	predicted gene 13736 [Source:MGI Symbol;Acc:MGI:3650137]	processed_pseudogene	7.57788	6.83391e-40
	Gm4735	predicted gene 4735 [Source:MGI Symbol;Acc:MGI:3645521]	processed_pseudogene	7.54669	7.0698e-172
	Gm13727	predicted gene 13727 [Source:MGI Symbol;Acc:MGI:3705322]	processed_transcript	6.56932	3.07321e-06
	Gm14153	predicted gene 14153 [Source:MGI Symbol;Acc:MGI:3651343]	processed_pseudogene	6.41971	7.73906e-06
	Gm14267	predicted gene 14267 [Source:MGI Symbol;Acc:MGI:3649851]	transcribed_processed_pseudogene	6.35175	1.61983e-08
	Gm13337	predicted gene 13337 [Source:MGI Symbol;Acc:MGI:3650269]	processed_pseudogene	6.29263	1.82893e-05
	Gm13999	predicted gene 13999 [Source:MGI Symbol;Acc:MGI:3651905]	antisense	6.28568	1.42471e-05
	Cwc22	CWC22 spliceosome-associated protein [Source:MGI Symbol;Acc:MGI:2136773]	protein_coding	5.33765	0
	Gm6710	predicted gene 6710 [Source:MGI Symbol;Acc:MGI:3779623]	protein_coding	4.82832	0.00158817
	Gm14292	predicted gene 14292 [Source:MGI Symbol;Acc:MGI:3649964]	processed_pseudogene	4.63916	8.30254e-09
	Gm13443	predicted gene 13443 [Source:MGI Symbol;Acc:MGI:3649615]	processed_pseudogene	4.4125	1.18834e-10
	Gm13453	predicted gene 13453 [Source:MGI Symbol;Acc:MGI:3651618]	processed_pseudogene	4.06831	1.00051e-08
	Fam227b	family with sequence similarity 227, member B [Source:MGI Symbol;Acc:MGI:1923073]	protein_coding	4.05608	0.0035026
	Gm14150	predicted gene 14150 [Source:MGI Symbol;Acc:MGI:3651006]	processed_pseudogene	3.83521	3.5768e-18
	Gm14419	predicted gene 14419 [Source:MGI Symbol;Acc:MGI:3702410]	protein_coding	2.80512	0.000213056
	Pla2g4e	phospholipase A2, group IVE [Source:MGI Symbol;Acc:MGI:1919144]	protein_coding	2.71265	8.31397e-99
	Gm14291	predicted gene 14291 [Source:MGI Symbol;Acc:MGI:3649962]	antisense	2.50539	1.00344e-14
	Slc17a9	solute carrier family 17, member 9 [Source:MGI Symbol;Acc:MGI:1919107]	protein_coding	1.92465	0.00280164
	Gm14025	predicted gene 14025 [Source:MGI Symbol;Acc:MGI:3649276]	protein_coding	1.78706	0.0011871
	Ada	adenosine deaminase [Source:MGI Symbol;Acc:MGI:87916]	protein_coding	1.75791	0.00185412
	A230005M16Rik	RIKEN cDNA A230005M16 gene [Source:MGI Symbol;Acc:MGI:3603401]	antisense	1.7542	0.000438443
	Grem1	gremlin 1, DAN family BMP antagonist [Source:MGI Symbol;Acc:MGI:1344337]	protein_coding	1.69676	2.03091e-05
	Armc3	armadillo repeat containing 3 [Source:MGI Symbol;Acc:MGI:1918132]	protein_coding	1.63501	0.000440903
	Bambi-ps1	BMP and activin membrane-bound inhibitor, pseudogene (Xenopus laevis) [Source:MGI Symbol;Acc:MGI:1932402]	processed_pseudogene	1.58349	0.000429614
	Scn9a	sodium channel, voltage-gated, type IX, alpha [Source:MGI Symbol;Acc:MGI:107636]	protein_coding	1.49978	4.11254e-08
	Scg5	secretogranin V [Source:MGI Symbol;Acc:MGI:98289]	protein_coding	1.42916	9.91479e-72
	Cd59a	CD59a antigen [Source:MGI Symbol;Acc:MGI:109177]	protein_coding	1.39306	8.64443e-10
	Ptgis	prostaglandin I2 (prostacyclin) synthase [Source:MGI Symbol;Acc:MGI:1097156]	protein_coding	1.3215	1.51475e-09
	Gm13629	predicted gene 13629 [Source:MGI Symbol;Acc:MGI:3650683]	antisense	1.32139	4.15741e-06
	Hdc	histidine decarboxylase [Source:MGI Symbol;Acc:MGI:96062]	protein_coding	1.31982	0.00283002
	Tcp11l1	t-complex 11 like 1 [Source:MGI Symbol;Acc:MGI:2444263]	protein_coding	1.29714	1.33412e-17
	Tmem203	transmembrane protein 203 [Source:MGI Symbol;Acc:MGI:2443597]	protein_coding	1.15189	9.87781e-09
	Myh7b	myosin, heavy chain 7B, cardiac muscle, beta [Source:MGI Symbol;Acc:MGI:3710243]	protein_coding	0.914054	1.35124e-10
	Pip5kl1	phosphatidylinositol-4-phosphate 5-kinase-like 1 [Source:MGI Symbol;Acc:MGI:2448520]	protein_coding	0.906487	0.000735315
	Matn4	matrilin 4 [Source:MGI Symbol;Acc:MGI:1328314]	protein_coding	0.873906	5.20023e-09
	Psmf1	proteasome (prosome, macropain) inhibitor subunit 1 [Source:MGI Symbol;Acc:MGI:1346072]	protein_coding	0.866295	1.10695e-15
	Proser2	proline and serine rich 2 [Source:MGI Symbol;Acc:MGI:2442238]	protein_coding	0.850941	0.00104484
	Wdr76	WD repeat domain 76 [Source:MGI Symbol;Acc:MGI:1926186]	protein_coding	0.832818	0.0018432
	Trub2	TruB pseudouridine (psi) synthase family member 2 [Source:MGI Symbol;Acc:MGI:2442186]	protein_coding	0.828413	7.66718e-11
	Cdk5rap1	CDK5 regulatory subunit associated protein 1 [Source:MGI Symbol;Acc:MGI:1914221]	protein_coding	0.693727	0.000931412
	Crb2	crumbs family member 2 [Source:MGI Symbol;Acc:MGI:2679260]	protein_coding	0.678383	0.000490461
	Gm14410	predicted gene 14410 [Source:MGI Symbol;Acc:MGI:3709158]	protein_coding	0.676055	0.00258537
	Gm13375	predicted gene 13375 [Source:MGI Symbol;Acc:MGI:3649913]	antisense	0.665469	0.000277408
	Dpp7	dipeptidylpeptidase 7 [Source:MGI Symbol;Acc:MGI:1933213]	protein_coding	0.660007	4.83523e-05
	Adamtsl2	ADAMTS-like 2 [Source:MGI Symbol;Acc:MGI:1925044]	protein_coding	0.60455	0.000651396
	Dph7	diphthamine biosynethesis 7 [Source:MGI Symbol;Acc:MGI:1914478]	protein_coding	0.577709	2.45934e-05
	Sh2d3c	SH2 domain containing 3C [Source:MGI Symbol;Acc:MGI:1351631]	protein_coding	0.520829	0.000382889
	Optn	optineurin [Source:MGI Symbol;Acc:MGI:1918898]	protein_coding	0.510886	0.000222827
	Bloc1s6	biogenesis of lysosomal organelles complex-1, subunit 6, pallidin [Source:MGI Symbol;Acc:MGI:1927580]	protein_coding	0.500908	2.2481e-05
	Tox2	TOX high mobility group box family member 2 [Source:MGI Symbol;Acc:MGI:3611233]	protein_coding	0.477792	0.00238743
	Mapkbp1	mitogen-activated protein kinase binding protein 1 [Source:MGI Symbol;Acc:MGI:1347004]	protein_coding	0.4655	5.60004e-05
	Rbm43	RNA binding motif protein 43 [Source:MGI Symbol;Acc:MGI:1918934]	protein_coding	0.453962	0.00198248
	Phf20	PHD finger protein 20 [Source:MGI Symbol;Acc:MGI:2444148]	protein_coding	0.433565	1.74508e-05
	Rpap1	RNA polymerase II associated protein 1 [Source:MGI Symbol;Acc:MGI:1916175]	protein_coding	0.429989	0.000866222
	Ckmt1	creatine kinase, mitochondrial 1, ubiquitous [Source:MGI Symbol;Acc:MGI:99441]	protein_coding	0.42596	6.45922e-06
	Srp14	signal recognition particle 14 [Source:MGI Symbol;Acc:MGI:107169]	protein_coding	0.393777	0.00027085
	Lrsam1	leucine rich repeat and sterile alpha motif containing 1 [Source:MGI Symbol;Acc:MGI:2684789]	protein_coding	0.38058	0.00143255
	Zer1	zyg-11 related, cell cycle regulator [Source:MGI Symbol;Acc:MGI:2442511]	protein_coding	0.324686	0.000508328
	Crat	carnitine acetyltransferase [Source:MGI Symbol;Acc:MGI:109501]	protein_coding	0.318688	0.00230534
	Prnp	prion protein [Source:MGI Symbol;Acc:MGI:97769]	protein_coding	0.310224	0.000198926
	Pigt	phosphatidylinositol glycan anchor biosynthesis, class T [Source:MGI Symbol;Acc:MGI:1926178]	protein_coding	0.306452	0.00378606
	Ssrp1	structure specific recognition protein 1 [Source:MGI Symbol;Acc:MGI:107912]	protein_coding	0.290871	0.00139522
	Abhd12	abhydrolase domain containing 12 [Source:MGI Symbol;Acc:MGI:1923442]	protein_coding	-0.263739	0.00202524
	Trp53inp2	transformation related protein 53 inducible nuclear protein 2 [Source:MGI Symbol;Acc:MGI:1915978]	protein_coding	-0.325443	0.000747361
	Tomm34	translocase of outer mitochondrial membrane 34 [Source:MGI Symbol;Acc:MGI:1914395]	protein_coding	-0.344328	0.00158375
	Cenpb	centromere protein B [Source:MGI Symbol;Acc:MGI:88376]	protein_coding	-0.347449	0.000505387
	2900097C17Rik	RIKEN cDNA 2900097C17 gene [Source:MGI Symbol;Acc:MGI:1914767]	lincRNA	-0.350198	0.00011604
	Rassf2	Ras association (RalGDS/AF-6) domain family member 2 [Source:MGI Symbol;Acc:MGI:2442060]	protein_coding	-0.355457	0.000720723
	Stk35	serine/threonine kinase 35 [Source:MGI Symbol;Acc:MGI:1914583]	protein_coding	-0.377243	0.00353738
	Hnrnpa3	heterogeneous nuclear ribonucleoprotein A3 [Source:MGI Symbol;Acc:MGI:1917171]	protein_coding	-0.392797	2.47986e-05
	Ivd	isovaleryl coenzyme A dehydrogenase [Source:MGI Symbol;Acc:MGI:1929242]	protein_coding	-0.393792	0.000183885
	Itgav	integrin alpha V [Source:MGI Symbol;Acc:MGI:96608]	protein_coding	-0.409672	0.00170567
	Cep250	centrosomal protein 250 [Source:MGI Symbol;Acc:MGI:108084]	protein_coding	-0.412378	0.00202845
	Itpka	inositol 1,4,5-trisphosphate 3-kinase A [Source:MGI Symbol;Acc:MGI:1333822]	protein_coding	-0.418128	0.000789653
	Uqcc1	ubiquinol-cytochrome c reductase complex assembly factor 1 [Source:MGI Symbol;Acc:MGI:1929472]	protein_coding	-0.451145	0.000107691
	Napb	N-ethylmaleimide sensitive fusion protein attachment protein beta [Source:MGI Symbol;Acc:MGI:104562]	protein_coding	-0.453425	6.63956e-07
	Nek6	NIMA (never in mitosis gene a)-related expressed kinase 6 [Source:MGI Symbol;Acc:MGI:1891638]	protein_coding	-0.472151	0.000607662
	Aqr	aquarius [Source:MGI Symbol;Acc:MGI:1276102]	protein_coding	-0.510025	8.81192e-05
	Arl5a	ADP-ribosylation factor-like 5A [Source:MGI Symbol;Acc:MGI:1922673]	protein_coding	-0.515946	2.10625e-06
	Itga6	integrin alpha 6 [Source:MGI Symbol;Acc:MGI:96605]	protein_coding	-0.518099	0.00199474
	Cir1	corepressor interacting with RBPJ, 1 [Source:MGI Symbol;Acc:MGI:1914185]	protein_coding	-0.561997	0.00189997
	Bcas1	breast carcinoma amplified sequence 1 [Source:MGI Symbol;Acc:MGI:1924210]	protein_coding	-0.565803	5.25359e-05
	Gle1	GLE1 RNA export mediator (yeast) [Source:MGI Symbol;Acc:MGI:1921662]	protein_coding	-0.576803	1.44414e-06
	Snhg11	small nucleolar RNA host gene 11 [Source:MGI Symbol;Acc:MGI:2441845]	protein_coding	-0.578331	4.21067e-06
	Ccdc148	coiled-coil domain containing 148 [Source:MGI Symbol;Acc:MGI:3039583]	protein_coding	-0.58505	0.00411128
	Upp2	uridine phosphorylase 2 [Source:MGI Symbol;Acc:MGI:1923904]	protein_coding	-0.585997	1.29705e-05
	Slc13a3	solute carrier family 13 (sodium-dependent dicarboxylate transporter), member 3 [Source:MGI Symbol;Acc:MGI:2149635]	protein_coding	-0.590627	7.95969e-05
	E2f1	E2F transcription factor 1 [Source:MGI Symbol;Acc:MGI:101941]	protein_coding	-0.604201	0.00196202
	Ermn	ermin, ERM-like protein [Source:MGI Symbol;Acc:MGI:1925017]	protein_coding	-0.621131	0.0017213
	Ppdpf	pancreatic progenitor cell differentiation and proliferation factor [Source:MGI Symbol;Acc:MGI:1913746]	protein_coding	-0.655773	9.62597e-08
	B2m	beta-2 microglobulin [Source:MGI Symbol;Acc:MGI:88127]	protein_coding	-0.671251	2.0246e-08
	Dbndd2	dysbindin (dystrobrevin binding protein 1) domain containing 2 [Source:MGI Symbol;Acc:MGI:106562]	protein_coding	-0.683318	8.77132e-10
	Fam171b	family with sequence similarity 171, member B [Source:MGI Symbol;Acc:MGI:2444579]	protein_coding	-0.711694	3.69872e-14
	Oser1	oxidative stress responsive serine rich 1 [Source:MGI Symbol;Acc:MGI:1913930]	protein_coding	-0.738232	0.000190147
	Tgm2	transglutaminase 2, C polypeptide [Source:MGI Symbol;Acc:MGI:98731]	protein_coding	-0.75835	0.000597765
	Gm14325	predicted gene 14325 [Source:MGI Symbol;Acc:MGI:3702875]	protein_coding	-0.775213	0.00168874
	Pkig	protein kinase inhibitor, gamma [Source:MGI Symbol;Acc:MGI:1343086]	protein_coding	-0.830593	2.8237e-15
	Haus2	HAUS augmin-like complex, subunit 2 [Source:MGI Symbol;Acc:MGI:1913546]	protein_coding	-0.837479	2.03894e-08
	Nup35	nucleoporin 35 [Source:MGI Symbol;Acc:MGI:1916732]	protein_coding	-0.841167	1.34845e-05
	Lypd6b	LY6/PLAUR domain containing 6B [Source:MGI Symbol;Acc:MGI:1919147]	protein_coding	-0.877249	8.91015e-07
	Gsn	gelsolin [Source:MGI Symbol;Acc:MGI:95851]	protein_coding	-0.887185	1.85371e-14
	Ccdc141	coiled-coil domain containing 141 [Source:MGI Symbol;Acc:MGI:1919735]	protein_coding	-0.926803	2.64221e-06
	Gm14326	predicted gene 14326 [Source:MGI Symbol;Acc:MGI:3709298]	protein_coding	-0.929843	1.03569e-06
	Mal	myelin and lymphocyte protein, T cell differentiation protein [Source:MGI Symbol;Acc:MGI:892970]	protein_coding	-0.978128	2.84976e-11
	Cd93	CD93 antigen [Source:MGI Symbol;Acc:MGI:106664]	protein_coding	-1.07123	0.00110969
	Eif3j1	eukaryotic translation initiation factor 3, subunit J1 [Source:MGI Symbol;Acc:MGI:1925905]	protein_coding	-1.11573	6.18149e-18
	Angptl2	angiopoietin-like 2 [Source:MGI Symbol;Acc:MGI:1347002]	protein_coding	-1.11796	0.000540477
	2500004C02Rik	RIKEN cDNA 2500004C02 gene [Source:MGI Symbol;Acc:MGI:1919576]	processed_transcript	-1.13157	1.39618e-05
	Stom	stomatin [Source:MGI Symbol;Acc:MGI:95403]	protein_coding	-1.17821	7.90681e-07
	Ahcy	S-adenosylhomocysteine hydrolase [Source:MGI Symbol;Acc:MGI:87968]	protein_coding	-1.18277	4.79399e-15
	1110018N20Rik	RIKEN cDNA 1110018N20 gene [Source:MGI Symbol;Acc:MGI:1915753]	processed_transcript	-1.2371	7.26481e-06
	Zfp970	zinc finger protein 970 [Source:MGI Symbol;Acc:MGI:3652255]	protein_coding	-1.31462	3.85382e-05
	Ptprt	protein tyrosine phosphatase, receptor type, T [Source:MGI Symbol;Acc:MGI:1321152]	protein_coding	-1.32348	1.15731e-34
	Mfap1b	microfibrillar-associated protein 1B [Source:MGI Symbol;Acc:MGI:3694697]	protein_coding	-1.42958	6.58311e-20
	Tmco5	transmembrane and coiled-coil domains 5 [Source:MGI Symbol;Acc:MGI:1914606]	protein_coding	-1.50051	0.000954337
	Capn3	calpain 3 [Source:MGI Symbol;Acc:MGI:107437]	protein_coding	-1.51031	4.84427e-09
	Tnfaip6	tumor necrosis factor alpha induced protein 6 [Source:MGI Symbol;Acc:MGI:1195266]	protein_coding	-1.55969	9.98051e-12
	Gm13688	predicted gene 13688 [Source:MGI Symbol;Acc:MGI:3652062]	processed_pseudogene	-1.63386	0.00156275
	A530058N18Rik	RIKEN cDNA A530058N18 gene [Source:MGI Symbol;Acc:MGI:2444858]	processed_transcript	-1.65974	0.000483968
	Slc2a4rg-ps	Slc2a4 regulator, pseudogene [Source:MGI Symbol;Acc:MGI:3651388]	transcribed_unitary_pseudogene	-1.89113	4.59464e-13
	Gm13341	predicted gene 13341 [Source:MGI Symbol;Acc:MGI:3650228]	unprocessed_pseudogene	-2.16927	2.95532e-06
	Rpl12	ribosomal protein L12 [Source:MGI Symbol;Acc:MGI:98002]	protein_coding	-2.19191	6.62099e-62
	E030013I19Rik	RIKEN cDNA E030013I19 gene [Source:MGI Symbol;Acc:MGI:2443735]	antisense	-2.42033	5.57001e-05
	5330413P13Rik	RIKEN cDNA 5330413P13 gene [Source:MGI Symbol;Acc:MGI:3041161]	lincRNA	-2.60801	7.59415e-06
	Fam83d	family with sequence similarity 83, member D [Source:MGI Symbol;Acc:MGI:1919128]	protein_coding	-2.61342	3.13411e-05
	1810024B03Rik	RIKEN cDNA 1810024B03 gene [Source:MGI Symbol;Acc:MGI:1925560]	protein_coding	-2.73045	0.000928423
	2810002D19Rik	RIKEN cDNA 2810002D19 gene [Source:MGI Symbol;Acc:MGI:1913707]	processed_transcript	-2.87258	8.28251e-10
	D330050G23Rik	RIKEN cDNA D330050G23 gene [Source:MGI Symbol;Acc:MGI:2445155]	lincRNA	-2.94273	4.27357e-07
	Bub1b	BUB1B, mitotic checkpoint serine/threonine kinase [Source:MGI Symbol;Acc:MGI:1333889]	protein_coding	-2.96932	1.77749e-06
	Mettl5os	methyltransferase like 5, opposite strand [Source:MGI Symbol;Acc:MGI:1922537]	antisense	-3.0965	0.00150864
	Gm14168	predicted gene 14168 [Source:MGI Symbol;Acc:MGI:3651463]	lincRNA	-3.3944	5.47081e-07
	Gm14296	predicted gene 14296 [Source:MGI Symbol;Acc:MGI:3708667]	protein_coding	-3.45088	3.6704e-06
	Gm14322	predicted gene 14322 [Source:MGI Symbol;Acc:MGI:3652185]	protein_coding	-3.88589	2.10671e-06
	Gm14305	predicted gene 14305 [Source:MGI Symbol;Acc:MGI:3709632]	protein_coding	-4.10407	1.4288e-26
	Gm14418	predicted gene 14418 [Source:MGI Symbol;Acc:MGI:3702408]	protein_coding	-4.69719	1.12005e-07
	Vsx1	visual system homeobox 1 [Source:MGI Symbol;Acc:MGI:1890816]	protein_coding	-4.82545	0.00204831
	Gm14057	predicted gene 14057 [Source:MGI Symbol;Acc:MGI:3705433]	transcribed_processed_pseudogene	-5.56879	0.000376558
	Gm13601	predicted gene 13601 [Source:MGI Symbol;Acc:MGI:3649286]	antisense	-5.61175	9.12226e-07
	Gm14295	predicted gene 14295 [Source:MGI Symbol;Acc:MGI:3709624]	protein_coding	-5.63675	1.26695e-36
	1700030C14Rik	RIKEN cDNA 1700030C14 gene [Source:MGI Symbol;Acc:MGI:1922912]	antisense	-5.76866	0.000196367
	Zfp937	zinc finger protein 937 [Source:MGI Symbol;Acc:MGI:3644476]	protein_coding	-6.0133	9.06918e-08
3	Gm9396	predicted gene 9396 [Source:MGI Symbol;Acc:MGI:3645563]	processed_pseudogene	8.60075	4.77779e-45
	Gm5539	predicted gene 5539 [Source:MGI Symbol;Acc:MGI:3644451]	processed_pseudogene	8.19178	1.10669e-10
	Gm10259	predicted pseudogene 10259 [Source:MGI Symbol;Acc:MGI:3704211]	processed_pseudogene	7.07367	2.22424e-08
	Gm15442	predicted gene 15442 [Source:MGI Symbol;Acc:MGI:3705708]	processed_pseudogene	6.50353	5.39725e-06
	Gm42205	predicted gene, 42205 [Source:MGI Symbol;Acc:MGI:5625090]	lincRNA	5.90977	1.40564e-05
	Gm3143	predicted gene 3143 [Source:MGI Symbol;Acc:MGI:3781322]	lincRNA	5.62654	0.000418478
	Gm42196	predicted gene, 42196 [Source:MGI Symbol;Acc:MGI:5625081]	lincRNA	5.36197	0.0011888
	Gm5841	predicted gene 5841 [Source:MGI Symbol;Acc:MGI:3645248]	processed_pseudogene	5.20596	0.00259856
	Gm10704	predicted pseudogene 10704 [Source:MGI Symbol;Acc:MGI:3642446]	processed_pseudogene	4.73542	2.89991e-09
	Gm9791	predicted pseudogene 9791 [Source:MGI Symbol;Acc:MGI:3642317]	processed_pseudogene	3.35523	0.000179648
	Fgf2os	fibroblast growth factor 2, opposite strand [Source:MGI Symbol;Acc:MGI:3649376]	antisense	3.23217	0.00150154
	Gm42743	predicted gene 42743 [Source:MGI Symbol;Acc:MGI:5662880]	lincRNA	2.69579	0.000142556
	Stoml3	stomatin (Epb7.2)-like 3 [Source:MGI Symbol;Acc:MGI:2388072]	protein_coding	2.41709	0.000707078
	Gm5844	predicted gene 5844 [Source:MGI Symbol;Acc:MGI:3645252]	processed_pseudogene	1.77806	7.84849e-07
	A930005H10Rik	RIKEN cDNA A930005H10 gene [Source:MGI Symbol;Acc:MGI:1915411]	processed_transcript	1.71019	4.44348e-16
	Gm4617	predicted pseudogene 4617 [Source:MGI Symbol;Acc:MGI:3704225]	processed_pseudogene	1.44424	3.90723e-05
	Gm9762	predicted pseudogene 9762 [Source:MGI Symbol;Acc:MGI:3704220]	processed_pseudogene	1.23506	0.000895969
	Spata1	spermatogenesis associated 1 [Source:MGI Symbol;Acc:MGI:1918201]	protein_coding	1.18042	0.00302528
	Slc25a24	solute carrier family 25 (mitochondrial carrier, phosphate carrier), member 24 [Source:MGI Symbol;Acc:MGI:1917160]	protein_coding	1.17321	0.000149065
	Rwdd3	RWD domain containing 3 [Source:MGI Symbol;Acc:MGI:1920420]	protein_coding	1.08454	6.58316e-06
	Amy1	amylase 1, salivary [Source:MGI Symbol;Acc:MGI:88019]	protein_coding	1.00969	9.34495e-06
	Cyr61	cysteine rich protein 61 [Source:MGI Symbol;Acc:MGI:88613]	protein_coding	0.954459	0.00110723
	Fhdc1	FH2 domain containing 1 [Source:MGI Symbol;Acc:MGI:2684972]	protein_coding	0.896947	9.2286e-05
	Psrc1	proline/serine-rich coiled-coil 1 [Source:MGI Symbol;Acc:MGI:1913099]	protein_coding	0.823229	7.62315e-06
	Hcn3	hyperpolarization-activated, cyclic nucleotide-gated K+ 3 [Source:MGI Symbol;Acc:MGI:1298211]	protein_coding	0.736099	1.25231e-05
	1110032F04Rik	RIKEN cDNA 1110032F04 gene [Source:MGI Symbol;Acc:MGI:1915975]	protein_coding	0.707325	0.00046457
	Lrrcc1	leucine rich repeat and coiled-coil domain containing 1 [Source:MGI Symbol;Acc:MGI:1918960]	protein_coding	0.672897	0.00104033
	F3	coagulation factor III [Source:MGI Symbol;Acc:MGI:88381]	protein_coding	0.482048	0.00153038
	4632415L05Rik	RIKEN cDNA 4632415L05 gene [Source:MGI Symbol;Acc:MGI:1918058]	lincRNA	0.478779	0.000239365
	Ppa2	pyrophosphatase (inorganic) 2 [Source:MGI Symbol;Acc:MGI:1922026]	protein_coding	0.414575	0.000950737
	1500004A13Rik	RIKEN cDNA 1500004A13 gene [Source:MGI Symbol;Acc:MGI:2442808]	processed_transcript	0.391151	0.000246222
	Slc16a1	solute carrier family 16 (monocarboxylic acid transporters), member 1 [Source:MGI Symbol;Acc:MGI:106013]	protein_coding	0.365996	0.00351816
	S100a1	S100 calcium binding protein A1 [Source:MGI Symbol;Acc:MGI:1338917]	protein_coding	0.348022	0.00198132
	Kcna2	potassium voltage-gated channel, shaker-related subfamily, member 2 [Source:MGI Symbol;Acc:MGI:96659]	protein_coding	0.296681	0.00024281
	Pigk	phosphatidylinositol glycan anchor biosynthesis, class K [Source:MGI Symbol;Acc:MGI:1913863]	protein_coding	0.294243	0.00386641
	Car2	carbonic anhydrase 2 [Source:MGI Symbol;Acc:MGI:88269]	protein_coding	-0.279502	0.0032312
	Ank2	ankyrin 2, brain [Source:MGI Symbol;Acc:MGI:88025]	protein_coding	-0.318109	0.000530872
	Zmat3	zinc finger matrin type 3 [Source:MGI Symbol;Acc:MGI:1195270]	protein_coding	-0.337591	0.00047156
	Setd7	SET domain containing (lysine methyltransferase) 7 [Source:MGI Symbol;Acc:MGI:1920501]	protein_coding	-0.373198	0.0012074
	Plppr4	phospholipid phosphatase related 4 [Source:MGI Symbol;Acc:MGI:106530]	protein_coding	-0.382413	0.000439274
	Dnajb14	DnaJ heat shock protein family (Hsp40) member B14 [Source:MGI Symbol;Acc:MGI:1917854]	protein_coding	-0.411064	4.19176e-05
	Phgdh	3-phosphoglycerate dehydrogenase [Source:MGI Symbol;Acc:MGI:1355330]	protein_coding	-0.419942	1.13659e-05
	Gnb4	guanine nucleotide binding protein (G protein), beta 4 [Source:MGI Symbol;Acc:MGI:104581]	protein_coding	-0.435592	0.00136825
	Zc2hc1a	zinc finger, C2HC-type containing 1A [Source:MGI Symbol;Acc:MGI:1914556]	protein_coding	-0.442781	0.00109966
	Slc7a14	solute carrier family 7 (cationic amino acid transporter, y+ system), member 14 [Source:MGI Symbol;Acc:MGI:3040688]	protein_coding	-0.463905	1.14609e-05
	Ctss	cathepsin S [Source:MGI Symbol;Acc:MGI:107341]	protein_coding	-0.485316	4.51909e-05
	S100a10	S100 calcium binding protein A10 (calpactin) [Source:MGI Symbol;Acc:MGI:1339468]	protein_coding	-0.531903	0.000486687
	Pag1	phosphoprotein associated with glycosphingolipid microdomains 1 [Source:MGI Symbol;Acc:MGI:2443160]	protein_coding	-0.563816	0.00033276
	Lxn	latexin [Source:MGI Symbol;Acc:MGI:107633]	protein_coding	-0.596815	5.31271e-05
	Exosc9	exosome component 9 [Source:MGI Symbol;Acc:MGI:1355319]	protein_coding	-0.617049	0.000169487
	Chd1l	chromodomain helicase DNA binding protein 1-like [Source:MGI Symbol;Acc:MGI:1915308]	protein_coding	-0.64847	0.000802023
	Zfp697	zinc finger protein 697 [Source:MGI Symbol;Acc:MGI:2139736]	protein_coding	-0.673684	5.45866e-05
	Cldn11	claudin 11 [Source:MGI Symbol;Acc:MGI:106925]	protein_coding	-0.698336	1.72077e-07
	St6galnac3	ST6 (alpha-N-acetyl-neuraminyl-2,3-beta-galactosyl-1,3)-N-acetylgalactosaminide alpha-2,6-sialyltransferase 3 [Source:MGI Symbol;Acc:MGI:1341828]	protein_coding	-0.710347	0.000875406
	Ugt8a	UDP galactosyltransferase 8A [Source:MGI Symbol;Acc:MGI:109522]	protein_coding	-0.740645	1.09978e-05
	Tspan2	tetraspanin 2 [Source:MGI Symbol;Acc:MGI:1917997]	protein_coding	-0.787422	3.11358e-08
	Ciart	circadian associated repressor of transcription [Source:MGI Symbol;Acc:MGI:2684975]	protein_coding	-0.881127	9.62227e-07
	Cetn4	centrin 4 [Source:MGI Symbol;Acc:MGI:2677454]	protein_coding	-0.886943	0.000377569
	Casp6	caspase 6 [Source:MGI Symbol;Acc:MGI:1312921]	protein_coding	-0.986202	0.00306635
	Capza1	capping protein (actin filament) muscle Z-line, alpha 1 [Source:MGI Symbol;Acc:MGI:106227]	protein_coding	-1.04121	2.6962e-11
	Tbck	TBC1 domain containing kinase [Source:MGI Symbol;Acc:MGI:2445052]	protein_coding	-1.09823	3.50899e-13
	Tpm3	tropomyosin 3, gamma [Source:MGI Symbol;Acc:MGI:1890149]	protein_coding	-1.1462	3.06104e-33
	Nes	nestin [Source:MGI Symbol;Acc:MGI:101784]	protein_coding	-1.17107	2.61044e-06
	Slc7a11	solute carrier family 7 (cationic amino acid transporter, y+ system), member 11 [Source:MGI Symbol;Acc:MGI:1347355]	protein_coding	-1.21588	0.000930095
	S100a11	S100 calcium binding protein A11 [Source:MGI Symbol;Acc:MGI:1338798]	protein_coding	-1.28826	0.00265365
	Arsj	arylsulfatase J [Source:MGI Symbol;Acc:MGI:2443513]	protein_coding	-1.30454	0.000870427
	E330034L11Rik	RIKEN cDNA E330034L11 gene [Source:MGI Symbol;Acc:MGI:3026962]	TEC	-1.40071	2.1034e-06
	Etnppl	ethanolamine phosphate phospholyase [Source:MGI Symbol;Acc:MGI:1919010]	protein_coding	-1.45575	3.42255e-08
	Sox2ot	SOX2 overlapping transcript (non-protein coding) [Source:MGI Symbol;Acc:MGI:2444112]	processed_transcript	-1.68034	2.14575e-16
	Ptgfr	prostaglandin F receptor [Source:MGI Symbol;Acc:MGI:97796]	protein_coding	-1.90381	0.00038467
	Bche	butyrylcholinesterase [Source:MGI Symbol;Acc:MGI:894278]	protein_coding	-1.91019	1.10118e-07
	Gm19439	predicted gene, 19439 [Source:MGI Symbol;Acc:MGI:5011624]	TEC	-2.13756	1.94902e-10
	Gm42841	predicted gene 42841 [Source:MGI Symbol;Acc:MGI:5662978]	TEC	-2.18242	0.0031444
	A230001M10Rik	RIKEN cDNA A230001M10 gene [Source:MGI Symbol;Acc:MGI:2443043]	lincRNA	-2.31714	0.000258765
	Adamtsl4	ADAMTS-like 4 [Source:MGI Symbol;Acc:MGI:2389008]	protein_coding	-2.46416	2.16274e-17
	Gbp3	guanylate binding protein 3 [Source:MGI Symbol;Acc:MGI:1926263]	protein_coding	-2.59573	2.70601e-07
	AI115009	expressed sequence AI115009 [Source:MGI Symbol;Acc:MGI:2139623]	antisense	-2.60747	4.75477e-08
	Rps3a1	ribosomal protein S3A1 [Source:MGI Symbol;Acc:MGI:1202063]	protein_coding	-2.60848	1.37223e-108
	A830019L24Rik	RIKEN cDNA A830019L24 gene [Source:MGI Symbol;Acc:MGI:2443282]	lincRNA	-3.00495	0.00292884
	Fcrls	Fc receptor-like S, scavenger receptor [Source:MGI Symbol;Acc:MGI:1933397]	protein_coding	-3.80171	6.62746e-88
	Gm9989	predicted gene 9989 [Source:MGI Symbol;Acc:MGI:3642361]	processed_transcript	-4.17786	9.24695e-06
	Gm5148	predicted gene 5148 [Source:MGI Symbol;Acc:MGI:3646006]	protein_coding	-4.78355	2.23619e-11
	Fcrl1	Fc receptor-like 1 [Source:MGI Symbol;Acc:MGI:2442862]	protein_coding	-5.27277	0.00118525
4	Clcnka	chloride channel, voltage-sensitive Ka [Source:MGI Symbol;Acc:MGI:1329026]	protein_coding	7.96184	4.17277e-10
	Gm11868	predicted gene 11868 [Source:MGI Symbol;Acc:MGI:3650507]	processed_pseudogene	7.08787	1.09566e-15
	Zfp990	zinc finger protein 990 [Source:MGI Symbol;Acc:MGI:3652161]	protein_coding	5.92736	0.00012649
	Zfp985	zinc finger protein 985 [Source:MGI Symbol;Acc:MGI:3651986]	protein_coding	5.75249	0.000278991
	Gm13200	predicted gene 13200 [Source:MGI Symbol;Acc:MGI:3650195]	lincRNA	5.6368	0.000405522
	Gm13178	predicted gene 13178 [Source:MGI Symbol;Acc:MGI:3650721]	protein_coding	5.13289	0.0032129
	Acnat2	acyl-coenzyme A amino acid N-acyltransferase 2 [Source:MGI Symbol;Acc:MGI:2444345]	protein_coding	4.99551	0.000853839
	Gm11815	predicted gene 11815 [Source:MGI Symbol;Acc:MGI:3650511]	lincRNA	4.61836	0.00358289
	Gm12892	predicted gene 12892 [Source:MGI Symbol;Acc:MGI:3649649]	processed_pseudogene	4.39597	2.46799e-61
	Klf17	Kruppel-like factor 17 [Source:MGI Symbol;Acc:MGI:2181068]	protein_coding	4.25616	0.00187392
	Zfp992	zinc finger protein 992 [Source:MGI Symbol;Acc:MGI:3700963]	protein_coding	2.98445	7.17498e-10
	Masp2	mannan-binding lectin serine peptidase 2 [Source:MGI Symbol;Acc:MGI:1330832]	protein_coding	2.83279	1.96865e-12
	Zfp979	zinc finger protein 979 [Source:MGI Symbol;Acc:MGI:2148252]	protein_coding	2.52525	0.00346073
	Sytl1	synaptotagmin-like 1 [Source:MGI Symbol;Acc:MGI:1933365]	protein_coding	2.392	2.32714e-10
	Rad54l	RAD54 like (S. cerevisiae) [Source:MGI Symbol;Acc:MGI:894697]	protein_coding	1.96865	3.43656e-07
	Fam166b	family with sequence similarity 166, member B [Source:MGI Symbol;Acc:MGI:2445194]	protein_coding	1.90832	0.0022612
	Crybg2	crystallin beta-gamma domain containing 2 [Source:MGI Symbol;Acc:MGI:1334463]	protein_coding	1.7441	6.33308e-06
	Rspo1	R-spondin 1 [Source:MGI Symbol;Acc:MGI:2183426]	protein_coding	1.7353	4.09478e-15
	Cenps	centromere protein S [Source:MGI Symbol;Acc:MGI:1917178]	protein_coding	1.7328	1.64666e-13
	Gm11223	predicted gene 11223 [Source:MGI Symbol;Acc:MGI:3651631]	processed_pseudogene	1.67511	2.25151e-05
	Angptl7	angiopoietin-like 7 [Source:MGI Symbol;Acc:MGI:3605801]	protein_coding	1.66109	0.00198115
	Spag8	sperm associated antigen 8 [Source:MGI Symbol;Acc:MGI:3056295]	protein_coding	1.59716	1.40603e-05
	Dmrtb1	DMRT-like family B with proline-rich C-terminal, 1 [Source:MGI Symbol;Acc:MGI:1927125]	protein_coding	1.56936	0.00406491
	Samd11	sterile alpha motif domain containing 11 [Source:MGI Symbol;Acc:MGI:2446220]	protein_coding	1.20694	0.00339622
	Pla2g5	phospholipase A2, group V [Source:MGI Symbol;Acc:MGI:101899]	protein_coding	1.17242	0.000750451
	Ttc39a	tetratricopeptide repeat domain 39A [Source:MGI Symbol;Acc:MGI:2444350]	protein_coding	1.12514	0.000875719
	B230208B08Rik	RIKEN cDNA B230208B08 gene [Source:MGI Symbol;Acc:MGI:2442149]	processed_transcript	1.12459	0.00342233
	Espn	espin [Source:MGI Symbol;Acc:MGI:1861630]	protein_coding	1.06308	1.48014e-06
	Tas1r1	taste receptor, type 1, member 1 [Source:MGI Symbol;Acc:MGI:1927505]	protein_coding	1.04436	0.000549225
	C1qtnf12	C1q and tumor necrosis factor related 12 [Source:MGI Symbol;Acc:MGI:1914639]	protein_coding	0.912255	2.53738e-08
	Trabd2b	TraB domain containing 2B [Source:MGI Symbol;Acc:MGI:3650152]	protein_coding	0.884831	5.14336e-08
	Nbl1	neuroblastoma, suppression of tumorigenicity 1 [Source:MGI Symbol;Acc:MGI:104591]	protein_coding	0.820921	1.51854e-10
	Echdc2	enoyl Coenzyme A hydratase domain containing 2 [Source:MGI Symbol;Acc:MGI:1289238]	protein_coding	0.799966	8.96395e-06
	Xkr8	X-linked Kx blood group related 8 [Source:MGI Symbol;Acc:MGI:2685877]	protein_coding	0.777564	0.00140799
	Agbl4	ATP/GTP binding protein-like 4 [Source:MGI Symbol;Acc:MGI:1918244]	protein_coding	0.729973	5.69423e-06
	Dhrs3	dehydrogenase/reductase (SDR family) member 3 [Source:MGI Symbol;Acc:MGI:1315215]	protein_coding	0.723708	8.54057e-07
	Fbxo6	F-box protein 6 [Source:MGI Symbol;Acc:MGI:1354743]	protein_coding	0.708496	5.11811e-08
	Rimkla	ribosomal modification protein rimK-like family member A [Source:MGI Symbol;Acc:MGI:3040686]	protein_coding	0.665462	2.92018e-05
	Exo5	exonuclease 5 [Source:MGI Symbol;Acc:MGI:1920422]	protein_coding	0.659932	0.00077543
	Rims3	regulating synaptic membrane exocytosis 3 [Source:MGI Symbol;Acc:MGI:2443331]	protein_coding	0.641035	1.78258e-07
	Tox	thymocyte selection-associated high mobility group box [Source:MGI Symbol;Acc:MGI:2181659]	protein_coding	0.634623	4.08332e-05
	9430015G10Rik	RIKEN cDNA 9430015G10 gene [Source:MGI Symbol;Acc:MGI:2444364]	protein_coding	0.610821	1.12808e-05
	Prdm16	PR domain containing 16 [Source:MGI Symbol;Acc:MGI:1917923]	protein_coding	0.57683	0.00073582
	Rpa2	replication protein A2 [Source:MGI Symbol;Acc:MGI:1339939]	protein_coding	0.57621	0.000240942
	Col9a2	collagen, type IX, alpha 2 [Source:MGI Symbol;Acc:MGI:88466]	protein_coding	0.572623	0.00242936
	Cyp2j9	cytochrome P450, family 2, subfamily j, polypeptide 9 [Source:MGI Symbol;Acc:MGI:1921769]	protein_coding	0.570991	0.000140142
	Akr7a5	aldo-keto reductase family 7, member A5 (aflatoxin aldehyde reductase) [Source:MGI Symbol;Acc:MGI:107796]	protein_coding	0.567607	0.000301051
	Mad2l2	MAD2 mitotic arrest deficient-like 2 [Source:MGI Symbol;Acc:MGI:1919140]	protein_coding	0.552217	0.00326704
	Mfsd2a	major facilitator superfamily domain containing 2A [Source:MGI Symbol;Acc:MGI:1923824]	protein_coding	0.551825	0.00113765
	Ppt1	palmitoyl-protein thioesterase 1 [Source:MGI Symbol;Acc:MGI:1298204]	protein_coding	0.522709	2.72093e-09
	Cyp2j6	cytochrome P450, family 2, subfamily j, polypeptide 6 [Source:MGI Symbol;Acc:MGI:1270148]	protein_coding	0.502306	0.000548475
	Focad	focadhesin [Source:MGI Symbol;Acc:MGI:2676921]	protein_coding	0.484872	0.000241165
	Nans	N-acetylneuraminic acid synthase (sialic acid synthase) [Source:MGI Symbol;Acc:MGI:2149820]	protein_coding	0.482414	0.00383206
	Eif2b3	eukaryotic translation initiation factor 2B, subunit 3 [Source:MGI Symbol;Acc:MGI:1313286]	protein_coding	0.469302	0.00328385
	Tmem215	transmembrane protein 215 [Source:MGI Symbol;Acc:MGI:2444167]	protein_coding	0.456774	0.00331076
	Padi2	peptidyl arginine deiminase, type II [Source:MGI Symbol;Acc:MGI:1338892]	protein_coding	0.347882	0.00377543
	Il11ra1	interleukin 11 receptor, alpha chain 1 [Source:MGI Symbol;Acc:MGI:107426]	protein_coding	0.343918	0.00404971
	Plch2	phospholipase C, eta 2 [Source:MGI Symbol;Acc:MGI:2443078]	protein_coding	0.342328	0.00371291
	Nudc	nudC nuclear distribution protein [Source:MGI Symbol;Acc:MGI:106014]	protein_coding	0.340759	0.000560032
	Clcn6	chloride channel, voltage-sensitive 6 [Source:MGI Symbol;Acc:MGI:1347049]	protein_coding	0.328087	0.000449582
	Atp13a2	ATPase type 13A2 [Source:MGI Symbol;Acc:MGI:1922022]	protein_coding	0.295172	0.00270045
	Stmn1	stathmin 1 [Source:MGI Symbol;Acc:MGI:96739]	protein_coding	-0.262014	0.0013556
	Mfn2	mitofusin 2 [Source:MGI Symbol;Acc:MGI:2442230]	protein_coding	-0.277003	0.00120449
	Dnajb5	DnaJ heat shock protein family (Hsp40) member B5 [Source:MGI Symbol;Acc:MGI:1930018]	protein_coding	-0.285529	0.00196751
	Fbxo44	F-box protein 44 [Source:MGI Symbol;Acc:MGI:1354744]	protein_coding	-0.301287	0.00169517
	Ece1	endothelin converting enzyme 1 [Source:MGI Symbol;Acc:MGI:1101357]	protein_coding	-0.325799	0.00246518
	Khdrbs1	KH domain containing, RNA binding, signal transduction associated 1 [Source:MGI Symbol;Acc:MGI:893579]	protein_coding	-0.331321	0.000202475
	Sh2d5	SH2 domain containing 5 [Source:MGI Symbol;Acc:MGI:2446215]	protein_coding	-0.341019	0.00400113
	Ybx1	Y box protein 1 [Source:MGI Symbol;Acc:MGI:99146]	protein_coding	-0.341433	9.38375e-05
	Ptprd	protein tyrosine phosphatase, receptor type, D [Source:MGI Symbol;Acc:MGI:97812]	protein_coding	-0.352167	0.00169183
	Paqr7	progestin and adipoQ receptor family member VII [Source:MGI Symbol;Acc:MGI:1919154]	protein_coding	-0.356597	0.000606015
	Wnt4	wingless-type MMTV integration site family, member 4 [Source:MGI Symbol;Acc:MGI:98957]	protein_coding	-0.389141	0.00388135
	Eif4g3	eukaryotic translation initiation factor 4 gamma, 3 [Source:MGI Symbol;Acc:MGI:1923935]	protein_coding	-0.390279	5.9533e-06
	Ttc39b	tetratricopeptide repeat domain 39B [Source:MGI Symbol;Acc:MGI:1917113]	protein_coding	-0.393073	0.00141217
	Rps8	ribosomal protein S8 [Source:MGI Symbol;Acc:MGI:98166]	protein_coding	-0.399234	0.000103795
	Hivep3	human immunodeficiency virus type I enhancer binding protein 3 [Source:MGI Symbol;Acc:MGI:106589]	protein_coding	-0.437368	0.000156762
	Rnf220	ring finger protein 220 [Source:MGI Symbol;Acc:MGI:1913993]	protein_coding	-0.447111	1.47153e-06
	Faxc	failed axon connections homolog [Source:MGI Symbol;Acc:MGI:1923382]	protein_coding	-0.479732	0.00103598
	C1qb	complement component 1, q subcomponent, beta polypeptide [Source:MGI Symbol;Acc:MGI:88224]	protein_coding	-0.485603	4.38856e-05
	Camk2n1	calcium/calmodulin-dependent protein kinase II inhibitor 1 [Source:MGI Symbol;Acc:MGI:1913509]	protein_coding	-0.489129	5.11039e-06
	Hp1bp3	heterochromatin protein 1, binding protein 3 [Source:MGI Symbol;Acc:MGI:109369]	protein_coding	-0.491863	2.37441e-09
	Coro2a	coronin, actin binding protein 2A [Source:MGI Symbol;Acc:MGI:1345966]	protein_coding	-0.50326	0.000538601
	Aldh4a1	aldehyde dehydrogenase 4 family, member A1 [Source:MGI Symbol;Acc:MGI:2443883]	protein_coding	-0.545551	0.000782474
	Rragd	Ras-related GTP binding D [Source:MGI Symbol;Acc:MGI:1098604]	protein_coding	-0.559421	2.17435e-05
	Slc24a2	solute carrier family 24 (sodium/potassium/calcium exchanger), member 2 [Source:MGI Symbol;Acc:MGI:1923626]	protein_coding	-0.561545	1.9214e-07
	Rnf38	ring finger protein 38 [Source:MGI Symbol;Acc:MGI:1920719]	protein_coding	-0.570355	5.15597e-05
	Klhl9	kelch-like 9 [Source:MGI Symbol;Acc:MGI:2180122]	protein_coding	-0.589083	2.59836e-09
	Elovl1	elongation of very long chain fatty acids (FEN1/Elo2, SUR4/Elo3, yeast)-like 1 [Source:MGI Symbol;Acc:MGI:1858959]	protein_coding	-0.596524	0.00132104
	Laptm5	lysosomal-associated protein transmembrane 5 [Source:MGI Symbol;Acc:MGI:108046]	protein_coding	-0.609104	1.52829e-06
	Id3	inhibitor of DNA binding 3 [Source:MGI Symbol;Acc:MGI:96398]	protein_coding	-0.630693	2.31237e-05
	Miip	migration and invasion inhibitory protein [Source:MGI Symbol;Acc:MGI:106506]	protein_coding	-0.641382	9.14667e-05
	Tmem125	transmembrane protein 125 [Source:MGI Symbol;Acc:MGI:1923409]	protein_coding	-0.656932	0.00298161
	Aurkaip1	aurora kinase A interacting protein 1 [Source:MGI Symbol;Acc:MGI:1913327]	protein_coding	-0.671613	1.98804e-08
	Cfap74	cilia and flagella associated protein 74 [Source:MGI Symbol;Acc:MGI:1917130]	protein_coding	-0.688784	6.61295e-05
	Yrdc	yrdC domain containing (E.coli) [Source:MGI Symbol;Acc:MGI:2387201]	protein_coding	-0.72786	4.99418e-06
	Btf3l4	basic transcription factor 3-like 4 [Source:MGI Symbol;Acc:MGI:1915312]	protein_coding	-0.734419	2.77446e-09
	Lyrm2	LYR motif containing 2 [Source:MGI Symbol;Acc:MGI:1917573]	protein_coding	-0.768161	7.8419e-05
	Lpar1	lysophosphatidic acid receptor 1 [Source:MGI Symbol;Acc:MGI:108429]	protein_coding	-0.770196	2.99201e-07
	Hdac1	histone deacetylase 1 [Source:MGI Symbol;Acc:MGI:108086]	protein_coding	-0.796001	1.41882e-07
	Fam213b	family with sequence similarity 213, member B [Source:MGI Symbol;Acc:MGI:1913719]	protein_coding	-0.797387	3.25403e-14
	Eno1	enolase 1, alpha non-neuron [Source:MGI Symbol;Acc:MGI:95393]	protein_coding	-0.822198	6.15965e-23
	Arhgef19	Rho guanine nucleotide exchange factor (GEF) 19 [Source:MGI Symbol;Acc:MGI:1925912]	protein_coding	-0.826702	1.13662e-07
	Plppr1	phospholipid phosphatase related 1 [Source:MGI Symbol;Acc:MGI:2445015]	protein_coding	-0.883192	8.73082e-05
	Kif17	kinesin family member 17 [Source:MGI Symbol;Acc:MGI:1098229]	protein_coding	-0.922773	1.74647e-07
	Tmem88b	transmembrane protein 88B [Source:MGI Symbol;Acc:MGI:2444329]	protein_coding	-0.937012	1.50217e-09
	Crocc	ciliary rootlet coiled-coil, rootletin [Source:MGI Symbol;Acc:MGI:3529431]	protein_coding	-1.0011	1.03859e-15
	Map3k6	mitogen-activated protein kinase kinase kinase 6 [Source:MGI Symbol;Acc:MGI:1855691]	protein_coding	-1.03686	0.00182417
	9930104L06Rik	RIKEN cDNA 9930104L06 gene [Source:MGI Symbol;Acc:MGI:3041172]	protein_coding	-1.10837	4.85887e-12
	Cort	cortistatin [Source:MGI Symbol;Acc:MGI:109538]	protein_coding	-1.11107	1.91861e-05
	AI464131	expressed sequence AI464131 [Source:MGI Symbol;Acc:MGI:2140300]	protein_coding	-1.22663	2.22725e-21
	Nkain3	Na+/K+ transporting ATPase interacting 3 [Source:MGI Symbol;Acc:MGI:2444830]	protein_coding	-1.277	0.00321505
	Dcdc2b	doublecortin domain containing 2b [Source:MGI Symbol;Acc:MGI:2686212]	protein_coding	-1.54171	2.97601e-07
	Sfn	stratifin [Source:MGI Symbol;Acc:MGI:1891831]	protein_coding	-1.58031	0.000293064
	Zfp933	zinc finger protein 933 [Source:MGI Symbol;Acc:MGI:1922865]	protein_coding	-1.60387	9.5594e-12
	C1qc	complement component 1, q subcomponent, C chain [Source:MGI Symbol;Acc:MGI:88225]	protein_coding	-1.74282	1.25839e-43
	Hmgn2	high mobility group nucleosomal binding domain 2 [Source:MGI Symbol;Acc:MGI:96136]	protein_coding	-2.01356	2.85787e-68
	Zfp991	zinc finger protein 991 [Source:MGI Symbol;Acc:MGI:3701604]	protein_coding	-2.83769	0.000501222
	1700047F07Rik	RIKEN cDNA 1700047F07 gene [Source:MGI Symbol;Acc:MGI:1920570]	lincRNA	-2.95713	0.00106512
	Smc2os	structural maintenance of chromosomes 2, opposite strand [Source:MGI Symbol;Acc:MGI:1919898]	antisense	-4.65272	0.00237216
	Gm13206	predicted gene 13206 [Source:MGI Symbol;Acc:MGI:3651440]	lincRNA	-5.17889	0.00235438
	Gm26880	predicted gene, 26880 [Source:MGI Symbol;Acc:MGI:5477374]	lincRNA	-5.38567	0.000964601
	Gm17167	predicted gene 17167 [Source:MGI Symbol;Acc:MGI:4937994]	processed_transcript	-5.48204	0.000499663
	Gm13301	predicted gene 13301 [Source:MGI Symbol;Acc:MGI:3707230]	transcribed_unprocessed_pseudogene	-6.26819	1.00972e-05
5	Gm7993	predicted gene 7993 [Source:MGI Symbol;Acc:MGI:3647399]	processed_pseudogene	8.42993	6.71127e-23
	Gm15920	predicted gene 15920 [Source:MGI Symbol;Acc:MGI:3801934]	processed_pseudogene	6.71777	3.68511e-66
	Got2-ps1	glutamatic-oxaloacetic transaminase 2, mitochondrial, pseudogene 1 [Source:MGI Symbol;Acc:MGI:104721]	processed_pseudogene	6.20372	7.61604e-15
	C330024D21Rik	RIKEN cDNA C330024D21 gene [Source:MGI Symbol;Acc:MGI:2444116]	processed_transcript	5.78345	2.56685e-05
	Gm8615	predicted pseudogene 8615 [Source:MGI Symbol;Acc:MGI:3647532]	transcribed_processed_pseudogene	5.55313	2.05696e-28
	Gm6089	predicted gene 6089 [Source:MGI Symbol;Acc:MGI:3647070]	processed_pseudogene	5.48231	0.000820602
	Gm42427	predicted gene 42427 [Source:MGI Symbol;Acc:MGI:5662564]	TEC	5.28041	8.72286e-07
	Gm2810	predicted pseudogene 2810 [Source:MGI Symbol;Acc:MGI:3780980]	processed_pseudogene	4.77211	1.60795e-18
	Gm13841	predicted gene 13841 [Source:MGI Symbol;Acc:MGI:3650890]	processed_pseudogene	3.99762	2.57401e-06
	Gm15975	predicted gene 15975 [Source:MGI Symbol;Acc:MGI:3801944]	processed_pseudogene	3.79049	0.00107704
	Abhd1	abhydrolase domain containing 1 [Source:MGI Symbol;Acc:MGI:1931013]	processed_transcript	3.00001	0.000293764
	Gm42639	predicted gene 42639 [Source:MGI Symbol;Acc:MGI:5662776]	TEC	2.69347	0.000344248
	Gm42858	predicted gene 42858 [Source:MGI Symbol;Acc:MGI:5662995]	TEC	2.1233	0.000919406
	Gm9924	predicted gene 9924 [Source:MGI Symbol;Acc:MGI:3642216]	TEC	2.10896	1.23787e-05
	Gm2420	predicted gene 2420 [Source:MGI Symbol;Acc:MGI:3780587]	transcribed_unprocessed_pseudogene	2.06927	3.13977e-05
	Gm8493	predicted gene 8493 [Source:MGI Symbol;Acc:MGI:3779800]	unprocessed_pseudogene	1.98122	0.00346827
	Ssc4d	scavenger receptor cysteine rich family, 4 domains [Source:MGI Symbol;Acc:MGI:1924709]	protein_coding	1.93863	1.17731e-06
	Tlr6	toll-like receptor 6 [Source:MGI Symbol;Acc:MGI:1341296]	protein_coding	1.78717	0.00161176
	Lrrc43	leucine rich repeat containing 43 [Source:MGI Symbol;Acc:MGI:2685907]	protein_coding	1.77309	0.00147605
	Gm35394	predicted gene, 35394 [Source:MGI Symbol;Acc:MGI:5594553]	lincRNA	1.67158	4.51419e-05
	Stbd1	starch binding domain 1 [Source:MGI Symbol;Acc:MGI:1261768]	protein_coding	1.6	1.47012e-06
	Gabra2	gamma-aminobutyric acid (GABA) A receptor, subunit alpha 2 [Source:MGI Symbol;Acc:MGI:95614]	protein_coding	1.58403	2.91172e-28
	Gm43457	predicted gene 43457 [Source:MGI Symbol;Acc:MGI:5663594]	TEC	1.3484	0.00337126
	Atp10d	ATPase, class V, type 10D [Source:MGI Symbol;Acc:MGI:2450125]	polymorphic_pseudogene	1.09685	0.000184669
	Pxmp2	peroxisomal membrane protein 2 [Source:MGI Symbol;Acc:MGI:107487]	protein_coding	1.05611	0.000591088
	Gbp9	guanylate-binding protein 9 [Source:MGI Symbol;Acc:MGI:3605620]	protein_coding	1.00247	0.000479866
	Gm15446	predicted gene 15446 [Source:MGI Symbol;Acc:MGI:3709333]	protein_coding	0.972507	2.73808e-05
	Cox18	cytochrome c oxidase assembly protein 18 [Source:MGI Symbol;Acc:MGI:2448532]	protein_coding	0.880396	2.28508e-07
	Wfs1	wolframin ER transmembrane glycoprotein [Source:MGI Symbol;Acc:MGI:1328355]	protein_coding	0.857706	2.13252e-20
	Abhd11	abhydrolase domain containing 11 [Source:MGI Symbol;Acc:MGI:1916008]	protein_coding	0.8352	2.6825e-10
	4933404O12Rik	RIKEN cDNA 4933404O12 gene [Source:MGI Symbol;Acc:MGI:1914002]	lincRNA	0.829054	4.53571e-08
	Gm42732	predicted gene 42732 [Source:MGI Symbol;Acc:MGI:5662869]	TEC	0.780347	8.41001e-10
	2610524H06Rik	RIKEN cDNA 2610524H06 gene [Source:MGI Symbol;Acc:MGI:2447819]	protein_coding	0.542805	0.00338232
	Limk1	LIM-domain containing, protein kinase [Source:MGI Symbol;Acc:MGI:104572]	protein_coding	0.538781	2.3167e-05
	Galnt11	polypeptide N-acetylgalactosaminyltransferase 11 [Source:MGI Symbol;Acc:MGI:2444392]	protein_coding	0.52765	2.23441e-06
	Mad1l1	MAD1 mitotic arrest deficient 1-like 1 [Source:MGI Symbol;Acc:MGI:1341857]	protein_coding	0.521526	0.00175982
	Gtpbp6	GTP binding protein 6 (putative) [Source:MGI Symbol;Acc:MGI:1306825]	protein_coding	0.502255	0.000418972
	Rita1	RBPJ interacting and tubulin associated 1 [Source:MGI Symbol;Acc:MGI:1922021]	protein_coding	0.453422	0.000630612
	Ssh1	slingshot protein phosphatase 1 [Source:MGI Symbol;Acc:MGI:2686240]	protein_coding	0.427008	0.00166143
	Abcb9	ATP-binding cassette, sub-family B (MDR/TAP), member 9 [Source:MGI Symbol;Acc:MGI:1861729]	protein_coding	0.425189	0.000662328
	Gtf2ird2	GTF2I repeat domain containing 2 [Source:MGI Symbol;Acc:MGI:2149780]	protein_coding	0.402766	0.00367915
	Scarb2	scavenger receptor class B, member 2 [Source:MGI Symbol;Acc:MGI:1196458]	protein_coding	0.394178	5.74341e-06
	Epha5	Eph receptor A5 [Source:MGI Symbol;Acc:MGI:99654]	protein_coding	0.391035	0.000193996
	Tctn2	tectonic family member 2 [Source:MGI Symbol;Acc:MGI:1915228]	processed_transcript	0.37503	0.00409133
	Gigyf1	GRB10 interacting GYF protein 1 [Source:MGI Symbol;Acc:MGI:1888677]	protein_coding	0.371393	0.000864706
	Coq5	coenzyme Q5 methyltransferase [Source:MGI Symbol;Acc:MGI:1098643]	protein_coding	0.359556	0.0025985
	Abcb8	ATP-binding cassette, sub-family B (MDR/TAP), member 8 [Source:MGI Symbol;Acc:MGI:1351667]	protein_coding	0.357135	0.000877813
	Vps33a	VPS33A CORVET/HOPS core subunit [Source:MGI Symbol;Acc:MGI:1924823]	protein_coding	0.313849	0.00133618
	Suds3	suppressor of defective silencing 3 homolog (S. cerevisiae) [Source:MGI Symbol;Acc:MGI:1919204]	protein_coding	0.308627	0.00147903
	2210016L21Rik	RIKEN cDNA 2210016L21 gene [Source:MGI Symbol;Acc:MGI:1919607]	protein_coding	0.297399	0.00291018
	Chchd2	coiled-coil-helix-coiled-coil-helix domain containing 2 [Source:MGI Symbol;Acc:MGI:1261428]	protein_coding	0.290704	0.000468433
	Miat	myocardial infarction associated transcript (non-protein coding) [Source:MGI Symbol;Acc:MGI:2444886]	lincRNA	0.244568	0.00395638
	Dcun1d4	DCN1, defective in cullin neddylation 1, domain containing 4 (S. cerevisiae) [Source:MGI Symbol;Acc:MGI:2140972]	protein_coding	-0.33072	0.000386762
	Ankrd13a	ankyrin repeat domain 13a [Source:MGI Symbol;Acc:MGI:1915670]	protein_coding	-0.359465	0.00354945
	Limch1	LIM and calponin homology domains 1 [Source:MGI Symbol;Acc:MGI:1924819]	protein_coding	-0.368207	0.00018793
	Kmt5a	lysine methyltransferase 5A [Source:MGI Symbol;Acc:MGI:1915206]	protein_coding	-0.37416	0.00105382
	Coq2	coenzyme Q2 4-hydroxybenzoate polyprenyltransferase [Source:MGI Symbol;Acc:MGI:1919133]	protein_coding	-0.423623	6.08801e-05
	Wscd2	WSC domain containing 2 [Source:MGI Symbol;Acc:MGI:2445030]	protein_coding	-0.428371	0.00035698
	Naaa	N-acylethanolamine acid amidase [Source:MGI Symbol;Acc:MGI:1914361]	protein_coding	-0.436236	0.000769623
	Tpcn1	two pore channel 1 [Source:MGI Symbol;Acc:MGI:2182472]	protein_coding	-0.518021	1.64043e-05
	Hmgb1	high mobility group box 1 [Source:MGI Symbol;Acc:MGI:96113]	protein_coding	-0.520499	5.65687e-09
	Lap3	leucine aminopeptidase 3 [Source:MGI Symbol;Acc:MGI:1914238]	protein_coding	-0.542273	3.90178e-07
	Pkd2	polycystic kidney disease 2 [Source:MGI Symbol;Acc:MGI:1099818]	protein_coding	-0.551779	0.00010868
	Hopx	HOP homeobox [Source:MGI Symbol;Acc:MGI:1916782]	protein_coding	-0.562498	0.00118496
	Gltp	glycolipid transfer protein [Source:MGI Symbol;Acc:MGI:1929253]	protein_coding	-0.585532	0.000152279
	Amz1	archaelysin family metallopeptidase 1 [Source:MGI Symbol;Acc:MGI:2442258]	protein_coding	-0.597945	0.0010291
	Fam222a	family with sequence similarity 222, member A [Source:MGI Symbol;Acc:MGI:3605543]	protein_coding	-0.65264	0.00361193
	Armc10	armadillo repeat containing 10 [Source:MGI Symbol;Acc:MGI:1914461]	protein_coding	-0.67713	9.03519e-06
	Gjc3	gap junction protein, gamma 3 [Source:MGI Symbol;Acc:MGI:2153041]	protein_coding	-0.702874	5.52534e-05
	Qdpr	quinoid dihydropteridine reductase [Source:MGI Symbol;Acc:MGI:97836]	protein_coding	-0.704967	1.25289e-07
	Medag	mesenteric estrogen dependent adipogenesis [Source:MGI Symbol;Acc:MGI:1917967]	protein_coding	-0.729786	0.00334167
	Ephb4	Eph receptor B4 [Source:MGI Symbol;Acc:MGI:104757]	protein_coding	-0.773652	0.00134737
	Crot	carnitine O-octanoyltransferase [Source:MGI Symbol;Acc:MGI:1921364]	protein_coding	-0.795402	8.82586e-07
	Crybb1	crystallin, beta B1 [Source:MGI Symbol;Acc:MGI:104992]	protein_coding	-0.814135	0.00396997
	Rbpj	recombination signal binding protein for immunoglobulin kappa J region [Source:MGI Symbol;Acc:MGI:96522]	protein_coding	-1.00431	1.13084e-12
	Cd38	CD38 antigen [Source:MGI Symbol;Acc:MGI:107474]	protein_coding	-1.01426	0.0024736
	Evc2	EvC ciliary complex subunit 2 [Source:MGI Symbol;Acc:MGI:1915775]	protein_coding	-1.06535	4.52743e-11
	Commd8	COMM domain containing 8 [Source:MGI Symbol;Acc:MGI:1343485]	protein_coding	-1.08557	7.99647e-20
	Gm15411	predicted gene 15411 [Source:MGI Symbol;Acc:MGI:3705213]	processed_transcript	-1.42352	0.00121145
	Tmed2	transmembrane p24 trafficking protein 2 [Source:MGI Symbol;Acc:MGI:1929269]	protein_coding	-1.6406	3.01013e-45
	Spp1	secreted phosphoprotein 1 [Source:MGI Symbol;Acc:MGI:98389]	protein_coding	-1.68778	1.0322e-08
	Gm16001	predicted gene 16001 [Source:MGI Symbol;Acc:MGI:3802119]	lincRNA	-1.82439	9.05363e-05
	Dmp1	dentin matrix protein 1 [Source:MGI Symbol;Acc:MGI:94910]	protein_coding	-1.85928	4.47768e-12
	4933427G23Rik	RIKEN cDNA 4933427G23 gene [Source:MGI Symbol;Acc:MGI:3036235]	transcribed_processed_pseudogene	-2.10852	0.000123239
	Prkag2os1	protein kinase, AMP-activated, gamma 2 non-catalytic subunit, opposite strand 1 [Source:MGI Symbol;Acc:MGI:1918411]	antisense	-2.13648	0.00154911
	Sod3	superoxide dismutase 3, extracellular [Source:MGI Symbol;Acc:MGI:103181]	protein_coding	-2.21837	7.32416e-24
	Gm16054	predicted gene 16054 [Source:MGI Symbol;Acc:MGI:3801819]	antisense	-2.28119	0.00243604
	Muc3a	mucin 3A, cell surface associated [Source:MGI Symbol;Acc:MGI:3588263]	protein_coding	-2.34809	7.74343e-12
	9430085M18Rik	RIKEN cDNA 9430085M18 gene [Source:MGI Symbol;Acc:MGI:1924611]	lincRNA	-2.48368	0.00243398
	Gm42769	predicted gene 42769 [Source:MGI Symbol;Acc:MGI:5662906]	TEC	-2.81497	0.000146745
	E130006D01Rik	RIKEN cDNA E130006D01 gene [Source:MGI Symbol;Acc:MGI:2685527]	lincRNA	-3.16616	0.00275418
	Gm5559	predicted gene 5559 [Source:MGI Symbol;Acc:MGI:3779498]	processed_pseudogene	-3.42737	0.000105283
	AI506816	expressed sequence AI506816 [Source:MGI Symbol;Acc:MGI:2140929]	processed_transcript	-4.97519	6.06239e-11
	Gm20700	predicted gene 20700 [Source:MGI Symbol;Acc:MGI:5313147]	antisense	-5.07894	0.00292672
	Gm43321	predicted gene 43321 [Source:MGI Symbol;Acc:MGI:5663458]	TEC	-6.70572	9.0704e-07
6	Gm9825	predicted gene 9825 [Source:MGI Symbol;Acc:MGI:3708729]	processed_pseudogene	6.71985	2.28355e-45
	Rbpj-ps3	recombination signal binding protein for immunoglobulin kappa J region, pseudogene 3 [Source:MGI Symbol;Acc:MGI:96525]	processed_pseudogene	6.60151	3.55242e-07
	Prss3	protease, serine 3 [Source:MGI Symbol;Acc:MGI:102758]	protein_coding	6.13599	7.21053e-05
	Atp6v0c-ps2	ATPase, H+ transporting, lysosomal V0 subunit C, pseudogene 2 [Source:MGI Symbol;Acc:MGI:2151816]	processed_pseudogene	5.85952	0
	Gm7292	predicted gene 7292 [Source:MGI Symbol;Acc:MGI:3645786]	lincRNA	5.06079	1.1574e-27
	Gm4875	predicted gene 4875 [Source:MGI Symbol;Acc:MGI:3648108]	processed_pseudogene	4.11089	3.13465e-07
	Nat8f2	N-acetyltransferase 8 (GCN5-related) family member 2 [Source:MGI Symbol;Acc:MGI:2136446]	protein_coding	3.92273	1.08749e-13
	1810020O05Rik	Riken cDNA 1810020O05 gene [Source:MGI Symbol;Acc:MGI:3586838]	lincRNA	3.25433	4.99169e-09
	Asb4	ankyrin repeat and SOCS box-containing 4 [Source:MGI Symbol;Acc:MGI:1929751]	protein_coding	3.01016	6.29476e-05
	Gm6210	predicted gene 6210 [Source:MGI Symbol;Acc:MGI:3643375]	processed_pseudogene	2.42741	1.00736e-06
	Calcr	calcitonin receptor [Source:MGI Symbol;Acc:MGI:101950]	protein_coding	2.1671	0.00300215
	Gm10069	predicted gene 10069 [Source:MGI Symbol;Acc:MGI:3641875]	antisense	2.07259	0.000730906
	Gm5879	predicted gene 5879 [Source:MGI Symbol;Acc:MGI:3647624]	processed_pseudogene	1.92002	0.000295838
	Gm43154	predicted gene 43154 [Source:MGI Symbol;Acc:MGI:5663291]	lincRNA	1.61177	0.00131194
	Gm765	predicted gene 765 [Source:MGI Symbol;Acc:MGI:2685611]	protein_coding	1.43566	0.000103265
	Dnah6	dynein, axonemal, heavy chain 6 [Source:MGI Symbol;Acc:MGI:107744]	protein_coding	1.27692	3.56683e-05
	Met	met proto-oncogene [Source:MGI Symbol;Acc:MGI:96969]	protein_coding	1.24054	3.55081e-10
	Lrrc23	leucine rich repeat containing 23 [Source:MGI Symbol;Acc:MGI:1315192]	protein_coding	1.19705	5.42065e-05
	6430584L05Rik	RIKEN cDNA 6430584L05 gene [Source:MGI Symbol;Acc:MGI:5439415]	lincRNA	1.0656	5.71828e-05
	Tspan11	tetraspanin 11 [Source:MGI Symbol;Acc:MGI:1915748]	protein_coding	0.981872	7.52826e-06
	Zfp783	zinc finger protein 783 [Source:MGI Symbol;Acc:MGI:3040704]	transcribed_unprocessed_pseudogene	0.89632	1.79639e-05
	Chrm2	cholinergic receptor, muscarinic 2, cardiac [Source:MGI Symbol;Acc:MGI:88397]	protein_coding	0.875656	2.464e-07
	Dlx6os1	distal-less homeobox 6, opposite strand 1 [Source:MGI Symbol;Acc:MGI:2443217]	antisense	0.85384	5.99621e-07
	Rarres2	retinoic acid receptor responder (tazarotene induced) 2 [Source:MGI Symbol;Acc:MGI:1918910]	protein_coding	0.82134	0.0024322
	Cfap100	cilia and flagella associated protein 100 [Source:MGI Symbol;Acc:MGI:2141635]	protein_coding	0.796951	0.000413197
	2210408F21Rik	RIKEN cDNA 2210408F21 gene [Source:MGI Symbol;Acc:MGI:1920902]	processed_transcript	0.638726	0.00131419
	Gm15631	predicted gene 15631 [Source:MGI Symbol;Acc:MGI:3783075]	lincRNA	0.619887	0.000745236
	Sdhaf3	succinate dehydrogenase complex assembly factor 3 [Source:MGI Symbol;Acc:MGI:1913288]	protein_coding	0.59397	0.000533886
	Isy1	ISY1 splicing factor homolog [Source:MGI Symbol;Acc:MGI:1923310]	protein_coding	0.529502	5.65659e-05
	Tspan9	tetraspanin 9 [Source:MGI Symbol;Acc:MGI:1924558]	protein_coding	0.509438	0.000425154
	Ccdc136	coiled-coil domain containing 136 [Source:MGI Symbol;Acc:MGI:1918128]	protein_coding	0.474022	2.78517e-05
	Podxl2	podocalyxin-like 2 [Source:MGI Symbol;Acc:MGI:2442488]	protein_coding	0.470945	0.000596617
	Nap1l5	nucleosome assembly protein 1-like 5 [Source:MGI Symbol;Acc:MGI:1923555]	protein_coding	0.461068	0.000175777
	Bola3	bolA-like 3 (E. coli) [Source:MGI Symbol;Acc:MGI:1925903]	protein_coding	0.427092	0.00108588
	Zfp239	zinc finger protein 239 [Source:MGI Symbol;Acc:MGI:1306812]	protein_coding	0.406914	0.000279558
	Tmsb10	thymosin, beta 10 [Source:MGI Symbol;Acc:MGI:109146]	protein_coding	0.404977	5.02908e-05
	Pole4	polymerase (DNA-directed), epsilon 4 (p12 subunit) [Source:MGI Symbol;Acc:MGI:1914229]	protein_coding	0.398432	0.000365297
	Slco1c1	solute carrier organic anion transporter family, member 1c1 [Source:MGI Symbol;Acc:MGI:1889679]	protein_coding	0.388615	0.00121773
	Slc25a18	solute carrier family 25 (mitochondrial carrier), member 18 [Source:MGI Symbol;Acc:MGI:1919053]	protein_coding	0.349831	0.00273881
	Repin1	replication initiator 1 [Source:MGI Symbol;Acc:MGI:1889817]	protein_coding	0.349441	0.00351597
	Eno2	enolase 2, gamma neuronal [Source:MGI Symbol;Acc:MGI:95394]	protein_coding	0.319022	0.000173757
	Gapdh	glyceraldehyde-3-phosphate dehydrogenase [Source:MGI Symbol;Acc:MGI:95640]	protein_coding	-0.294285	0.000617494
	Wnk1	WNK lysine deficient protein kinase 1 [Source:MGI Symbol;Acc:MGI:2442092]	protein_coding	-0.294983	0.00403637
	Lmo3	LIM domain only 3 [Source:MGI Symbol;Acc:MGI:102810]	protein_coding	-0.367941	0.0016988
	Klhl42	kelch-like 42 [Source:MGI Symbol;Acc:MGI:2444786]	protein_coding	-0.379604	0.00381674
	Tmem229a	transmembrane protein 229A [Source:MGI Symbol;Acc:MGI:2442812]	protein_coding	-0.406441	0.000213923
	Mest	mesoderm specific transcript [Source:MGI Symbol;Acc:MGI:96968]	protein_coding	-0.417334	0.0021504
	Atp6v0e2	ATPase, H+ transporting, lysosomal V0 subunit E2 [Source:MGI Symbol;Acc:MGI:1923502]	protein_coding	-0.442249	4.19409e-06
	Bhlhe40	basic helix-loop-helix family, member e40 [Source:MGI Symbol;Acc:MGI:1097714]	protein_coding	-0.457065	0.000294689
	Hipk2	homeodomain interacting protein kinase 2 [Source:MGI Symbol;Acc:MGI:1314872]	protein_coding	-0.464592	0.00375601
	Grin2b	glutamate receptor, ionotropic, NMDA2B (epsilon 2) [Source:MGI Symbol;Acc:MGI:95821]	protein_coding	-0.478537	2.80126e-06
	Skap2	src family associated phosphoprotein 2 [Source:MGI Symbol;Acc:MGI:1889206]	protein_coding	-0.530774	0.00385445
	Frmd4b	FERM domain containing 4B [Source:MGI Symbol;Acc:MGI:2141794]	protein_coding	-0.531539	0.00192798
	H2afj	H2A histone family, member J [Source:MGI Symbol;Acc:MGI:3606192]	protein_coding	-0.536499	5.09751e-05
	Kcna1	potassium voltage-gated channel, shaker-related subfamily, member 1 [Source:MGI Symbol;Acc:MGI:96654]	protein_coding	-0.537824	8.42261e-05
	Pon2	paraoxonase 2 [Source:MGI Symbol;Acc:MGI:106687]	protein_coding	-0.539562	3.36154e-06
	Etnk1	ethanolamine kinase 1 [Source:MGI Symbol;Acc:MGI:1922570]	protein_coding	-0.546887	1.53231e-06
	Nfu1	NFU1 iron-sulfur cluster scaffold [Source:MGI Symbol;Acc:MGI:1913290]	protein_coding	-0.549898	1.33463e-05
	Ptn	pleiotrophin [Source:MGI Symbol;Acc:MGI:97804]	protein_coding	-0.552173	1.35017e-07
	Nat8f4	N-acetyltransferase 8 (GCN5-related) family member 4 [Source:MGI Symbol;Acc:MGI:1922791]	protein_coding	-0.56377	0.00152886
	Ccnd2	cyclin D2 [Source:MGI Symbol;Acc:MGI:88314]	protein_coding	-0.614674	2.3235e-07
	Edem1	ER degradation enhancer, mannosidase alpha-like 1 [Source:MGI Symbol;Acc:MGI:2180139]	protein_coding	-0.616102	2.06242e-05
	Slco1a4	solute carrier organic anion transporter family, member 1a4 [Source:MGI Symbol;Acc:MGI:1351896]	protein_coding	-0.617891	6.34577e-05
	Fam234b	family with sequence similarity 234, member B [Source:MGI Symbol;Acc:MGI:1921775]	protein_coding	-0.63594	8.24599e-13
	Zfp862-ps	zinc finger protein 862, pseudogene [Source:MGI Symbol;Acc:MGI:1889827]	transcribed_unitary_pseudogene	-0.636241	0.00168628
	Parp12	poly (ADP-ribose) polymerase family, member 12 [Source:MGI Symbol;Acc:MGI:2143990]	protein_coding	-0.655446	0.00147464
	Lag3	lymphocyte-activation gene 3 [Source:MGI Symbol;Acc:MGI:106588]	protein_coding	-0.689887	0.00256639
	Tgfa	transforming growth factor alpha [Source:MGI Symbol;Acc:MGI:98724]	protein_coding	-0.773992	0.000118866
	Arhgdib	Rho, GDP dissociation inhibitor (GDI) beta [Source:MGI Symbol;Acc:MGI:101940]	protein_coding	-0.818698	0.00309858
	Irak2	interleukin-1 receptor-associated kinase 2 [Source:MGI Symbol;Acc:MGI:2429603]	protein_coding	-0.914577	3.35206e-08
	Tigar	Trp53 induced glycolysis repulatory phosphatase [Source:MGI Symbol;Acc:MGI:2442752]	protein_coding	-1.02648	3.68245e-12
	Wipf3	WAS/WASL interacting protein family, member 3 [Source:MGI Symbol;Acc:MGI:3044681]	protein_coding	-1.20122	8.07624e-36
	Gm26809	predicted gene, 26809 [Source:MGI Symbol;Acc:MGI:5477303]	lincRNA	-1.54717	3.88079e-05
	Rps4l	ribosomal protein S4-like [Source:MGI Symbol;Acc:MGI:1913434]	transcribed_processed_pseudogene	-1.82893	1.04744e-14
	Gm44250	predicted gene, 44250 [Source:MGI Symbol;Acc:MGI:5690642]	TEC	-2.29735	7.43733e-06
	BC035044	cDNA sequence BC035044 [Source:MGI Symbol;Acc:MGI:2448540]	protein_coding	-2.32389	0.00352812
	1110019D14Rik	RIKEN cDNA 1110019D14 gene [Source:MGI Symbol;Acc:MGI:1923561]	lincRNA	-2.73535	3.02795e-06
	Gm44242	predicted gene, 44242 [Source:MGI Symbol;Acc:MGI:5690634]	TEC	-2.73909	1.83481e-05
	Smyd1	SET and MYND domain containing 1 [Source:MGI Symbol;Acc:MGI:104790]	protein_coding	-2.81871	1.11258e-08
	Nat8f3	N-acetyltransferase 8 (GCN5-related) family member 3 [Source:MGI Symbol;Acc:MGI:2136449]	protein_coding	-2.84105	6.443e-07
	Gm26653	predicted gene, 26653 [Source:MGI Symbol;Acc:MGI:5477147]	antisense	-2.95065	0.000423468
	Clec4a2	C-type lectin domain family 4, member a2 [Source:MGI Symbol;Acc:MGI:1349412]	protein_coding	-2.97772	0.00166116
	Pon3	paraoxonase 3 [Source:MGI Symbol;Acc:MGI:106686]	protein_coding	-3.31637	2.17689e-08
	Gm30055	predicted gene, 30055 [Source:MGI Symbol;Acc:MGI:5589214]	TEC	-4.57262	0.0040063
	Gm10334	predicted gene 10334 [Source:MGI Symbol;Acc:MGI:3641889]	protein_coding	-5.4708	9.96938e-05
	Gm44090	predicted gene, 44090 [Source:MGI Symbol;Acc:MGI:5690482]	TEC	-6.93773	4.67319e-07
7	Gm7224	predicted gene 7224 [Source:MGI Symbol;Acc:MGI:3647435]	unprocessed_pseudogene	8.29139	4.15739e-11
	Usf2-ps1	upstream transcription factor 2, pseudogene 1 [Source:MGI Symbol;Acc:MGI:2153531]	unprocessed_pseudogene	7.37191	4.16929e-09
	Gm38569	predicted gene, 38569 [Source:MGI Symbol;Acc:MGI:5621454]	lincRNA	6.9449	3.05358e-07
	Gm3375	predicted gene 3375 [Source:MGI Symbol;Acc:MGI:3781553]	processed_pseudogene	6.92611	1.36866e-82
	Gm26793	predicted gene, 26793 [Source:MGI Symbol;Acc:MGI:5477287]	antisense	6.92031	5.34147e-08
	BC049730	cDNA sequence BC049730 [Source:MGI Symbol;Acc:MGI:2681843]	protein_coding	6.00062	7.2114e-05
	Spn	sialophorin [Source:MGI Symbol;Acc:MGI:98384]	protein_coding	5.60082	1.04063e-11
	Gm9347	predicted gene 9347 [Source:MGI Symbol;Acc:MGI:3648409]	processed_pseudogene	5.47518	0.000109903
	Gm45456	predicted gene 45456 [Source:MGI Symbol;Acc:MGI:5791292]	processed_pseudogene	5.44899	0.000136645
	Gm15501	predicted pseudogene 15501 [Source:MGI Symbol;Acc:MGI:3704296]	transcribed_processed_pseudogene	5.29981	1.41558e-22
	Gm25774	predicted gene, 25774 [Source:MGI Symbol;Acc:MGI:5455551]	miRNA	5.14284	0.00313032
	Hsd17b14	hydroxysteroid (17-beta) dehydrogenase 14 [Source:MGI Symbol;Acc:MGI:1913315]	protein_coding	4.65267	0.00291727
	Gm5898	predicted gene 5898 [Source:MGI Symbol;Acc:MGI:3644921]	processed_pseudogene	4.37275	1.14756e-20
	Gm4353	predicted gene 4353 [Source:MGI Symbol;Acc:MGI:3782538]	protein_coding	4.25057	3.36902e-14
	Gm4366	predicted gene 4366 [Source:MGI Symbol;Acc:MGI:3782551]	processed_pseudogene	4.12436	4.60662e-106
	Gm5905	predicted gene 5905 [Source:MGI Symbol;Acc:MGI:3647422]	processed_pseudogene	4.0257	2.3587e-31
	Gm20083	predicted gene, 20083 [Source:MGI Symbol;Acc:MGI:5012268]	lincRNA	3.65447	5.78704e-24
	Gm15494	predicted gene 15494 [Source:MGI Symbol;Acc:MGI:3782940]	antisense	3.01189	0.000481632
	Ppp1ccb	protein phosphatase 1 catalytic subunit gamma B [Source:MGI Symbol;Acc:MGI:3647492]	transcribed_processed_pseudogene	2.78671	6.55848e-30
	Gm5900	predicted pseudogene 5900 [Source:MGI Symbol;Acc:MGI:3643907]	processed_pseudogene	2.4145	1.58031e-06
	Gm7353	predicted pseudogene 7353 [Source:MGI Symbol;Acc:MGI:3643014]	processed_pseudogene	2.38892	6.79854e-06
	Exoc3l2	exocyst complex component 3-like 2 [Source:MGI Symbol;Acc:MGI:1921713]	protein_coding	2.25996	6.33588e-05
	Alpk3	alpha-kinase 3 [Source:MGI Symbol;Acc:MGI:2151224]	protein_coding	1.969	1.48047e-05
	Hddc3	HD domain containing 3 [Source:MGI Symbol;Acc:MGI:1915945]	protein_coding	1.87231	2.52404e-21
	Gm45130	predicted gene 45130 [Source:MGI Symbol;Acc:MGI:5753706]	TEC	1.71535	3.02948e-05
	Magel2	melanoma antigen, family L, 2 [Source:MGI Symbol;Acc:MGI:1351648]	protein_coding	1.66098	0.000137095
	Dnah3	dynein, axonemal, heavy chain 3 [Source:MGI Symbol;Acc:MGI:2683040]	protein_coding	1.65649	0.0040277
	Cfap46	cilia and flagella associated protein 46 [Source:MGI Symbol;Acc:MGI:2444387]	protein_coding	1.58792	8.51108e-12
	Gm45629	predicted gene 45629 [Source:MGI Symbol;Acc:MGI:5791465]	TEC	1.24821	9.89546e-05
	Plekha4	pleckstrin homology domain containing, family A (phosphoinositide binding specific) member 4 [Source:MGI Symbol;Acc:MGI:1916467]	protein_coding	1.24097	3.4392e-06
	Tnnt1	troponin T1, skeletal, slow [Source:MGI Symbol;Acc:MGI:1333868]	protein_coding	1.23643	5.23632e-05
	Ndn	necdin [Source:MGI Symbol;Acc:MGI:97290]	protein_coding	1.10527	5.58148e-14
	Folh1	folate hydrolase 1 [Source:MGI Symbol;Acc:MGI:1858193]	protein_coding	0.990167	0.000233372
	Plpp4	phospholipid phosphatase 4 [Source:MGI Symbol;Acc:MGI:2685936]	protein_coding	0.969877	8.1373e-06
	Pafah1b3	platelet-activating factor acetylhydrolase, isoform 1b, subunit 3 [Source:MGI Symbol;Acc:MGI:108414]	protein_coding	0.951145	3.16356e-07
	Dnhd1	dynein heavy chain domain 1 [Source:MGI Symbol;Acc:MGI:1924755]	protein_coding	0.899662	0.000458123
	Ntn5	netrin 5 [Source:MGI Symbol;Acc:MGI:2685330]	protein_coding	0.850059	0.00124939
	Zfp658	zinc finger protein 658 [Source:MGI Symbol;Acc:MGI:2652821]	protein_coding	0.767227	0.000120747
	A230057D06Rik	RIKEN cDNA A230057D06 gene [Source:MGI Symbol;Acc:MGI:2442922]	lincRNA	0.738968	0.00231858
	Cavin3	caveolae associated 3 [Source:MGI Symbol;Acc:MGI:1923422]	protein_coding	0.73762	2.32154e-06
	Nrip3	nuclear receptor interacting protein 3 [Source:MGI Symbol;Acc:MGI:1925843]	protein_coding	0.70725	5.69243e-10
	Tmem145	transmembrane protein 145 [Source:MGI Symbol;Acc:MGI:3607779]	protein_coding	0.684005	5.7072e-07
	Tcerg1l	transcription elongation regulator 1-like [Source:MGI Symbol;Acc:MGI:1917821]	protein_coding	0.667435	0.000176336
	Il4ra	interleukin 4 receptor, alpha [Source:MGI Symbol;Acc:MGI:105367]	protein_coding	0.654543	0.00370394
	Sergef	secretion regulating guanine nucleotide exchange factor [Source:MGI Symbol;Acc:MGI:1351630]	protein_coding	0.637158	5.50921e-07
	Ppp1r15a	protein phosphatase 1, regulatory subunit 15A [Source:MGI Symbol;Acc:MGI:1927072]	protein_coding	0.623362	0.000286284
	Ethe1	ethylmalonic encephalopathy 1 [Source:MGI Symbol;Acc:MGI:1913321]	protein_coding	0.612176	0.00224263
	Olfml1	olfactomedin-like 1 [Source:MGI Symbol;Acc:MGI:2679264]	protein_coding	0.497847	0.00353257
	Kptn	kaptin [Source:MGI Symbol;Acc:MGI:1890380]	protein_coding	0.478968	0.000256335
	Mfge8	milk fat globule-EGF factor 8 protein [Source:MGI Symbol;Acc:MGI:102768]	protein_coding	0.474762	7.92866e-08
	Thrsp	thyroid hormone responsive [Source:MGI Symbol;Acc:MGI:109126]	protein_coding	0.462518	0.000360663
	Vrk3	vaccinia related kinase 3 [Source:MGI Symbol;Acc:MGI:2182465]	protein_coding	0.431827	0.000979574
	Arnt2	aryl hydrocarbon receptor nuclear translocator 2 [Source:MGI Symbol;Acc:MGI:107188]	protein_coding	0.426749	5.06838e-05
	Yif1b	Yip1 interacting factor homolog B (S. cerevisiae) [Source:MGI Symbol;Acc:MGI:1924504]	protein_coding	0.420459	0.00336923
	Pnmal2	PNMA-like 2 [Source:MGI Symbol;Acc:MGI:3645856]	protein_coding	0.408874	0.000773707
	Tpp1	tripeptidyl peptidase I [Source:MGI Symbol;Acc:MGI:1336194]	protein_coding	0.407651	0.000518418
	Coq7	demethyl-Q 7 [Source:MGI Symbol;Acc:MGI:107207]	protein_coding	0.405168	0.0022158
	Nell1	NEL-like 1 [Source:MGI Symbol;Acc:MGI:2443902]	protein_coding	0.404385	0.0013406
	Pnkp	polynucleotide kinase 3'- phosphatase [Source:MGI Symbol;Acc:MGI:1891698]	protein_coding	0.392431	0.00281798
	Synm	synemin, intermediate filament protein [Source:MGI Symbol;Acc:MGI:2661187]	protein_coding	0.389602	0.000749348
	Zfp180	zinc finger protein 180 [Source:MGI Symbol;Acc:MGI:1923701]	protein_coding	0.388102	0.000792267
	Crebzf	CREB/ATF bZIP transcription factor [Source:MGI Symbol;Acc:MGI:2675296]	protein_coding	0.348684	0.00271207
	Bckdk	branched chain ketoacid dehydrogenase kinase [Source:MGI Symbol;Acc:MGI:1276121]	protein_coding	0.33277	0.0033303
	Kndc1	kinase non-catalytic C-lobe domain (KIND) containing 1 [Source:MGI Symbol;Acc:MGI:1923734]	protein_coding	0.325931	0.00323785
	Wdr11	WD repeat domain 11 [Source:MGI Symbol;Acc:MGI:1920230]	protein_coding	0.313777	0.00235063
	Leng8	leukocyte receptor cluster (LRC) member 8 [Source:MGI Symbol;Acc:MGI:2142195]	protein_coding	0.301069	0.00358989
	Ptov1	prostate tumor over expressed gene 1 [Source:MGI Symbol;Acc:MGI:1933946]	protein_coding	0.284773	0.00236035
	Slc8a2	solute carrier family 8 (sodium/calcium exchanger), member 2 [Source:MGI Symbol;Acc:MGI:107996]	protein_coding	-0.302759	0.000171486
	Shank2	SH3 and multiple ankyrin repeat domains 2 [Source:MGI Symbol;Acc:MGI:2671987]	protein_coding	-0.310316	0.00356766
	Sbf2	SET binding factor 2 [Source:MGI Symbol;Acc:MGI:1921831]	protein_coding	-0.364809	0.00326145
	Sbk1	SH3-binding kinase 1 [Source:MGI Symbol;Acc:MGI:2135937]	protein_coding	-0.371469	0.000187782
	Rnf141	ring finger protein 141 [Source:MGI Symbol;Acc:MGI:1914400]	protein_coding	-0.373223	0.00161711
	Plekha1	pleckstrin homology domain containing, family A (phosphoinositide binding specific) member 1 [Source:MGI Symbol;Acc:MGI:2442213]	protein_coding	-0.37599	0.000956499
	Tjp1	tight junction protein 1 [Source:MGI Symbol;Acc:MGI:98759]	protein_coding	-0.409394	0.000213069
	Parva	parvin, alpha [Source:MGI Symbol;Acc:MGI:1931144]	protein_coding	-0.413062	0.00033899
	Ric3	RIC3 acetylcholine receptor chaperone [Source:MGI Symbol;Acc:MGI:2443887]	protein_coding	-0.413415	4.77547e-05
	Bub3	BUB3 mitotic checkpoint protein [Source:MGI Symbol;Acc:MGI:1343463]	protein_coding	-0.44323	1.43559e-05
	Dctn5	dynactin 5 [Source:MGI Symbol;Acc:MGI:1891689]	protein_coding	-0.45799	8.80944e-05
	Mrps12	mitochondrial ribosomal protein S12 [Source:MGI Symbol;Acc:MGI:1346333]	protein_coding	-0.471089	0.000352096
	Spty2d1	SPT2, Suppressor of Ty, domain containing 1 (S. cerevisiae) [Source:MGI Symbol;Acc:MGI:2142062]	protein_coding	-0.486938	0.00108975
	Ccp110	centriolar coiled coil protein 110 [Source:MGI Symbol;Acc:MGI:2141942]	protein_coding	-0.499755	0.000149917
	Ndufa3	NADH:ubiquinone oxidoreductase subunit A3 [Source:MGI Symbol;Acc:MGI:1913341]	protein_coding	-0.515701	0.000342063
	Mtg1	mitochondrial ribosome-associated GTPase 1 [Source:MGI Symbol;Acc:MGI:2685015]	protein_coding	-0.526133	0.00181881
	Gsg1l	GSG1-like [Source:MGI Symbol;Acc:MGI:2685483]	protein_coding	-0.541921	4.89831e-06
	Kcnj11	potassium inwardly rectifying channel, subfamily J, member 11 [Source:MGI Symbol;Acc:MGI:107501]	protein_coding	-0.552407	5.60489e-06
	Isoc2a	isochorismatase domain containing 2a [Source:MGI Symbol;Acc:MGI:3609243]	protein_coding	-0.562626	0.000177457
	Rammet	RNMT actvating mRNA cap methylating subunit [Source:MGI Symbol;Acc:MGI:1914398]	protein_coding	-0.584465	1.35859e-07
	Zfp772	zinc finger protein 772 [Source:MGI Symbol;Acc:MGI:2385265]	protein_coding	-0.598865	0.00104387
	Siglech	sialic acid binding Ig-like lectin H [Source:MGI Symbol;Acc:MGI:2443256]	protein_coding	-0.626221	0.000225924
	Ltbp4	latent transforming growth factor beta binding protein 4 [Source:MGI Symbol;Acc:MGI:1321395]	protein_coding	-0.629319	6.0999e-08
	Mag	myelin-associated glycoprotein [Source:MGI Symbol;Acc:MGI:96912]	protein_coding	-0.635864	4.05007e-05
	Rnf169	ring finger protein 169 [Source:MGI Symbol;Acc:MGI:1920257]	protein_coding	-0.637562	5.26657e-10
	Serpinh1	serine (or cysteine) peptidase inhibitor, clade H, member 1 [Source:MGI Symbol;Acc:MGI:88283]	protein_coding	-0.676294	4.02723e-06
	Ctsc	cathepsin C [Source:MGI Symbol;Acc:MGI:109553]	protein_coding	-0.678483	0.0034193
	Mcee	methylmalonyl CoA epimerase [Source:MGI Symbol;Acc:MGI:1920974]	protein_coding	-0.695957	6.22928e-05
	Tyrobp	TYRO protein tyrosine kinase binding protein [Source:MGI Symbol;Acc:MGI:1277211]	protein_coding	-0.734038	0.000247165
	Dbp	D site albumin promoter binding protein [Source:MGI Symbol;Acc:MGI:94866]	protein_coding	-0.755456	1.03272e-08
	Hps5	HPS5, biogenesis of lysosomal organelles complex 2 subunit 2 [Source:MGI Symbol;Acc:MGI:2180307]	protein_coding	-0.773686	0.000122418
	Cyp2s1	cytochrome P450, family 2, subfamily s, polypeptide 1 [Source:MGI Symbol;Acc:MGI:1921384]	protein_coding	-0.78331	0.00408469
	Tmc7	transmembrane channel-like gene family 7 [Source:MGI Symbol;Acc:MGI:2443317]	protein_coding	-0.783864	0.000151891
	Ccnd1	cyclin D1 [Source:MGI Symbol;Acc:MGI:88313]	protein_coding	-0.784988	7.30583e-09
	Rps15a	ribosomal protein S15A [Source:MGI Symbol;Acc:MGI:2389091]	protein_coding	-0.840736	1.58385e-16
	Timm10b	translocase of inner mitochondrial membrane 10B [Source:MGI Symbol;Acc:MGI:1315196]	protein_coding	-1.02821	1.47464e-06
	Htatip2	HIV-1 Tat interactive protein 2 [Source:MGI Symbol;Acc:MGI:1859271]	protein_coding	-1.05122	1.4526e-06
	9130019O22Rik	RIKEN cDNA 9130019O22 gene [Source:MGI Symbol;Acc:MGI:1926171]	protein_coding	-1.05649	0.0029907
	Ryr1	ryanodine receptor 1, skeletal muscle [Source:MGI Symbol;Acc:MGI:99659]	protein_coding	-1.15452	2.1145e-08
	Itpripl2	inositol 1,4,5-triphosphate receptor interacting protein-like 2 [Source:MGI Symbol;Acc:MGI:2442416]	protein_coding	-1.16685	2.95855e-05
	Gm45847	predicted gene 45847 [Source:MGI Symbol;Acc:MGI:5804962]	lincRNA	-1.2944	0.00114928
	A830073O21Rik	RIKEN cDNA A830073O21 gene [Source:MGI Symbol;Acc:MGI:2443692]	TEC	-1.32684	0.00229405
	Pop4	processing of precursor 4, ribonuclease P/MRP family, (S. cerevisiae) [Source:MGI Symbol;Acc:MGI:1913411]	protein_coding	-1.47476	4.97391e-20
	Klk6	kallikrein related-peptidase 6 [Source:MGI Symbol;Acc:MGI:1343166]	protein_coding	-1.53663	0.000430238
	Pycard	PYD and CARD domain containing [Source:MGI Symbol;Acc:MGI:1931465]	protein_coding	-1.82188	9.32059e-06
	Gm44698	predicted gene 44698 [Source:MGI Symbol;Acc:MGI:5753274]	lincRNA	-2.17015	0.00238894
	E230029C05Rik	RIKEN cDNA E230029C05 gene [Source:MGI Symbol;Acc:MGI:2442580]	processed_transcript	-2.3766	4.41099e-06
	Eps8l1	EPS8-like 1 [Source:MGI Symbol;Acc:MGI:1914675]	protein_coding	-2.45233	6.22785e-11
	Gm34121	predicted gene, 34121 [Source:MGI Symbol;Acc:MGI:5593280]	processed_transcript	-2.56332	0.00386101
	Gm15510	predicted gene 15510 [Source:MGI Symbol;Acc:MGI:3782958]	antisense	-2.57053	5.70929e-05
	Trim12c	tripartite motif-containing 12C [Source:MGI Symbol;Acc:MGI:4821183]	protein_coding	-2.71256	4.29562e-09
	Gm18194	predicted gene, 18194 [Source:MGI Symbol;Acc:MGI:5010379]	transcribed_processed_pseudogene	-3.10356	4.22667e-05
	Trim12a	tripartite motif-containing 12A [Source:MGI Symbol;Acc:MGI:1923931]	protein_coding	-3.11561	4.42268e-08
	Myo7a	myosin VIIA [Source:MGI Symbol;Acc:MGI:104510]	protein_coding	-3.15952	2.5326e-43
	C5ar1	complement component 5a receptor 1 [Source:MGI Symbol;Acc:MGI:88232]	protein_coding	-3.32174	0.00227158
	Trim30d	tripartite motif-containing 30D [Source:MGI Symbol;Acc:MGI:3035181]	protein_coding	-4.09449	2.12845e-05
	Oscar	osteoclast associated receptor [Source:MGI Symbol;Acc:MGI:2179720]	protein_coding	-4.1518	8.39909e-06
	Bc1	brain cytoplasmic RNA 1 [Source:MGI Symbol;Acc:MGI:104905]	lincRNA	-4.20491	9.64338e-17
	Hbb-bt	hemoglobin, beta adult t chain [Source:MGI Symbol;Acc:MGI:5474850]	protein_coding	-4.4758	3.856e-47
	Tnfrsf23	tumor necrosis factor receptor superfamily, member 23 [Source:MGI Symbol;Acc:MGI:1930269]	protein_coding	-5.58892	5.43872e-05
	Ptprh	protein tyrosine phosphatase, receptor type, H [Source:MGI Symbol;Acc:MGI:3026877]	protein_coding	-6.72996	1.29986e-07
8	Ccdc194	coiled-coil domain containing 194 [Source:MGI Symbol;Acc:MGI:3588239]	protein_coding	6.55356	3.53219e-06
	Rps26-ps1	ribosomal protein S26, pseudogene 1 [Source:MGI Symbol;Acc:MGI:3704322]	transcribed_processed_pseudogene	6.24981	9.32753e-66
	Gm8730	predicted pseudogene 8730 [Source:MGI Symbol;Acc:MGI:3644565]	processed_pseudogene	5.86348	3.19531e-73
	Adad2	adenosine deaminase domain containing 2 [Source:MGI Symbol;Acc:MGI:1923023]	protein_coding	5.44005	1.9142e-17
	Nudc-ps1	nuclear distribution gene C homolog (Aspergillus), pseudogene 1 [Source:MGI Symbol;Acc:MGI:2142657]	processed_pseudogene	4.9512	7.36721e-38
	Gm45117	predicted gene 45117 [Source:MGI Symbol;Acc:MGI:5753693]	TEC	4.35054	0.00120949
	Gm7901	predicted gene 7901 [Source:MGI Symbol;Acc:MGI:3645047]	processed_pseudogene	4.2842	1.58339e-11
	Gm3985	predicted gene 3985 [Source:MGI Symbol;Acc:MGI:3782158]	lincRNA	2.34092	7.08205e-08
	Tnfsf13b	tumor necrosis factor (ligand) superfamily, member 13b [Source:MGI Symbol;Acc:MGI:1344376]	protein_coding	2.31575	3.89395e-09
	Gm18860	predicted gene, 18860 [Source:MGI Symbol;Acc:MGI:5011045]	processed_pseudogene	2.2926	0.000197782
	Gm1840	predicted gene 1840 [Source:MGI Symbol;Acc:MGI:3037698]	processed_pseudogene	2.1027	3.07124e-08
	Lrrc36	leucine rich repeat containing 36 [Source:MGI Symbol;Acc:MGI:2448585]	protein_coding	1.90668	0.00107865
	Fam92b	family with sequence similarity 92, member B [Source:MGI Symbol;Acc:MGI:3588213]	protein_coding	1.78919	0.000815804
	Gm40466	predicted gene, 40466 [Source:MGI Symbol;Acc:MGI:5623351]	unprocessed_pseudogene	1.76628	0.000543156
	Il12rb1	interleukin 12 receptor, beta 1 [Source:MGI Symbol;Acc:MGI:104579]	protein_coding	1.59615	0.00165479
	Ccl25	chemokine (C-C motif) ligand 25 [Source:MGI Symbol;Acc:MGI:1099448]	protein_coding	1.49426	1.23521e-17
	Cfap97d2	CFAP97 domain containing 2 [Source:MGI Symbol;Acc:MGI:2685952]	protein_coding	1.43913	0.0023414
	Gm17022	predicted gene 17022 [Source:MGI Symbol;Acc:MGI:4937849]	processed_pseudogene	1.42098	0.00146946
	Gm10282	predicted pseudogene 10282 [Source:MGI Symbol;Acc:MGI:3704312]	protein_coding	1.40284	8.9642e-14
	Zfp963	zinc finger protein 963 [Source:MGI Symbol;Acc:MGI:4867078]	protein_coding	1.22628	3.35176e-05
	Sfrp1	secreted frizzled-related protein 1 [Source:MGI Symbol;Acc:MGI:892014]	protein_coding	1.02092	4.25943e-08
	Gm21811	predicted gene, 21811 [Source:MGI Symbol;Acc:MGI:5433975]	unprocessed_pseudogene	0.965535	5.03512e-06
	Plvap	plasmalemma vesicle associated protein [Source:MGI Symbol;Acc:MGI:1890497]	protein_coding	0.863187	5.38487e-06
	Ednra	endothelin receptor type A [Source:MGI Symbol;Acc:MGI:105923]	protein_coding	0.838506	0.0012909
	Nqo1	NAD(P)H dehydrogenase, quinone 1 [Source:MGI Symbol;Acc:MGI:103187]	protein_coding	0.829133	0.000470504
	Adat1	adenosine deaminase, tRNA-specific 1 [Source:MGI Symbol;Acc:MGI:1353631]	protein_coding	0.702024	0.000906982
	Cmtm3	CKLF-like MARVEL transmembrane domain containing 3 [Source:MGI Symbol;Acc:MGI:2447162]	protein_coding	0.684087	0.000224803
	Zfp612	zinc finger protein 612 [Source:MGI Symbol;Acc:MGI:2443465]	protein_coding	0.680745	4.01462e-09
	Ssbp4	single stranded DNA binding protein 4 [Source:MGI Symbol;Acc:MGI:1924150]	protein_coding	0.675127	1.98438e-13
	Ddx19b	DEAD (Asp-Glu-Ala-Asp) box polypeptide 19b [Source:MGI Symbol;Acc:MGI:2148251]	protein_coding	0.673283	6.58908e-10
	Tppp3	tubulin polymerization-promoting protein family member 3 [Source:MGI Symbol;Acc:MGI:1915221]	protein_coding	0.642885	0.000156165
	Jak3	Janus kinase 3 [Source:MGI Symbol;Acc:MGI:99928]	protein_coding	0.623742	0.00253403
	Mmp15	matrix metallopeptidase 15 [Source:MGI Symbol;Acc:MGI:109320]	protein_coding	0.618096	2.7908e-05
	Zfp423	zinc finger protein 423 [Source:MGI Symbol;Acc:MGI:1891217]	protein_coding	0.567838	0.000619836
	Col4a2	collagen, type IV, alpha 2 [Source:MGI Symbol;Acc:MGI:88455]	protein_coding	0.554881	1.88758e-06
	Zfp868	zinc finger protein 868 [Source:MGI Symbol;Acc:MGI:2142546]	protein_coding	0.501379	0.00253526
	Bbs2	Bardet-Biedl syndrome 2 (human) [Source:MGI Symbol;Acc:MGI:2135267]	protein_coding	0.495365	9.03795e-05
	Wwox	WW domain-containing oxidoreductase [Source:MGI Symbol;Acc:MGI:1931237]	protein_coding	0.490596	0.000974985
	Hsf4	heat shock transcription factor 4 [Source:MGI Symbol;Acc:MGI:1347058]	protein_coding	0.463753	0.00203209
	Hapln4	hyaluronan and proteoglycan link protein 4 [Source:MGI Symbol;Acc:MGI:2679531]	protein_coding	0.46313	5.67978e-05
	Kcnn1	potassium intermediate/small conductance calcium-activated channel, subfamily N, member 1 [Source:MGI Symbol;Acc:MGI:1933993]	protein_coding	0.459094	0.002434
	Ocel1	occludin/ELL domain containing 1 [Source:MGI Symbol;Acc:MGI:1924340]	protein_coding	0.45813	0.00334308
	Gtpbp3	GTP binding protein 3 [Source:MGI Symbol;Acc:MGI:1917609]	protein_coding	0.449639	0.000576469
	Fcho1	FCH domain only 1 [Source:MGI Symbol;Acc:MGI:1921265]	protein_coding	0.438135	1.24951e-05
	Fam32a	family with sequence similarity 32, member A [Source:MGI Symbol;Acc:MGI:1915172]	protein_coding	0.437764	8.08263e-06
	Rnaseh2a	ribonuclease H2, large subunit [Source:MGI Symbol;Acc:MGI:1916974]	protein_coding	0.435036	0.00256012
	Pnpla6	patatin-like phospholipase domain containing 6 [Source:MGI Symbol;Acc:MGI:1354723]	protein_coding	0.431582	0.000104363
	Afg3l1	AFG3-like AAA ATPase 1 [Source:MGI Symbol;Acc:MGI:1928277]	protein_coding	0.431163	0.00026729
	Lpl	lipoprotein lipase [Source:MGI Symbol;Acc:MGI:96820]	protein_coding	0.426497	0.00298934
	2310022B05Rik	RIKEN cDNA 2310022B05 gene [Source:MGI Symbol;Acc:MGI:1916801]	protein_coding	0.413388	0.0036167
	Trappc2l	trafficking protein particle complex 2-like [Source:MGI Symbol;Acc:MGI:1916295]	protein_coding	0.399079	0.000428374
	Smim19	small integral membrane protein 19 [Source:MGI Symbol;Acc:MGI:2142501]	protein_coding	0.393816	0.00142883
	Polb	polymerase (DNA directed), beta [Source:MGI Symbol;Acc:MGI:97740]	protein_coding	0.386844	0.000455377
	Zdhhc1	zinc finger, DHHC domain containing 1 [Source:MGI Symbol;Acc:MGI:1918046]	protein_coding	0.385382	0.000392791
	Cdk10	cyclin-dependent kinase 10 [Source:MGI Symbol;Acc:MGI:2448549]	protein_coding	0.370934	0.000609517
	Gipc1	GIPC PDZ domain containing family, member 1 [Source:MGI Symbol;Acc:MGI:1926252]	protein_coding	0.360563	0.00258651
	Gabarapl2	gamma-aminobutyric acid (GABA) A receptor-associated protein-like 2 [Source:MGI Symbol;Acc:MGI:1890602]	protein_coding	0.33116	0.000279517
	Mtmr7	myotubularin related protein 7 [Source:MGI Symbol;Acc:MGI:1891693]	protein_coding	-0.332823	0.00158691
	Man2b1	mannosidase 2, alpha B1 [Source:MGI Symbol;Acc:MGI:107286]	protein_coding	-0.345017	0.0026271
	Banp	BTG3 associated nuclear protein [Source:MGI Symbol;Acc:MGI:1889023]	protein_coding	-0.376081	0.00152388
	Def8	differentially expressed in FDCP 8 [Source:MGI Symbol;Acc:MGI:1346331]	protein_coding	-0.406152	0.000332332
	Ncan	neurocan [Source:MGI Symbol;Acc:MGI:104694]	protein_coding	-0.477435	1.04054e-08
	Gab1	growth factor receptor bound protein 2-associated protein 1 [Source:MGI Symbol;Acc:MGI:108088]	protein_coding	-0.486164	0.000513629
	Kcnk1	potassium channel, subfamily K, member 1 [Source:MGI Symbol;Acc:MGI:109322]	protein_coding	-0.499902	2.48019e-06
	Nkd1	naked cuticle 1 [Source:MGI Symbol;Acc:MGI:2135954]	protein_coding	-0.552728	0.00244178
	Zfp617	zinc finger protein 617 [Source:MGI Symbol;Acc:MGI:2684459]	protein_coding	-0.574031	0.000710198
	Wdr83os	WD repeat domain 83 opposite strand [Source:MGI Symbol;Acc:MGI:3041257]	protein_coding	-0.576506	8.10403e-05
	Myo16	myosin XVI [Source:MGI Symbol;Acc:MGI:2685951]	protein_coding	-0.577085	8.92064e-06
	Naf1	nuclear assembly factor 1 ribonucleoprotein [Source:MGI Symbol;Acc:MGI:2682306]	protein_coding	-0.588485	0.000879237
	Dusp4	dual specificity phosphatase 4 [Source:MGI Symbol;Acc:MGI:2442191]	protein_coding	-0.63579	0.000514791
	Tmem59l	transmembrane protein 59-like [Source:MGI Symbol;Acc:MGI:1915187]	protein_coding	-0.646695	2.02719e-09
	Mri1	methylthioribose-1-phosphate isomerase 1 [Source:MGI Symbol;Acc:MGI:1915123]	protein_coding	-0.656914	0.000268563
	Necab2	N-terminal EF-hand calcium binding protein 2 [Source:MGI Symbol;Acc:MGI:2152211]	protein_coding	-0.671643	1.73947e-06
	Slc7a2	solute carrier family 7 (cationic amino acid transporter, y+ system), member 2 [Source:MGI Symbol;Acc:MGI:99828]	protein_coding	-0.754581	2.7044e-05
	Dctd	dCMP deaminase [Source:MGI Symbol;Acc:MGI:2444529]	protein_coding	-0.767448	0.00192442
	Cmc2	COX assembly mitochondrial protein 2 [Source:MGI Symbol;Acc:MGI:1913781]	protein_coding	-0.830321	7.01746e-06
	Rnf122	ring finger protein 122 [Source:MGI Symbol;Acc:MGI:1916117]	protein_coding	-0.872419	0.000351963
	Proz	protein Z, vitamin K-dependent plasma glycoprotein [Source:MGI Symbol;Acc:MGI:1860488]	protein_coding	-1.00178	4.80239e-07
	Mt3	metallothionein 3 [Source:MGI Symbol;Acc:MGI:97173]	protein_coding	-1.0618	8.14509e-13
	Scoc	short coiled-coil protein [Source:MGI Symbol;Acc:MGI:1927654]	protein_coding	-1.07201	2.13671e-21
	Hpgd	hydroxyprostaglandin dehydrogenase 15 (NAD) [Source:MGI Symbol;Acc:MGI:108085]	protein_coding	-1.1598	0.000100274
	Star	steroidogenic acute regulatory protein [Source:MGI Symbol;Acc:MGI:102760]	protein_coding	-1.18046	3.86028e-06
	Gm10033	predicted gene 10033 [Source:MGI Symbol;Acc:MGI:3642803]	transcribed_unprocessed_pseudogene	-1.19517	3.69873e-06
	1700029J07Rik	RIKEN cDNA 1700029J07 gene [Source:MGI Symbol;Acc:MGI:1916729]	protein_coding	-1.22669	0.000329733
	Slc5a5	solute carrier family 5 (sodium iodide symporter), member 5 [Source:MGI Symbol;Acc:MGI:2149330]	protein_coding	-1.30745	1.72203e-11
	Uba52	ubiquitin A-52 residue ribosomal protein fusion product 1 [Source:MGI Symbol;Acc:MGI:98887]	protein_coding	-1.38321	5.44291e-08
	Nudt7	nudix (nucleoside diphosphate linked moiety X)-type motif 7 [Source:MGI Symbol;Acc:MGI:1914778]	protein_coding	-1.65613	9.37959e-06
	Pkd1l3	polycystic kidney disease 1 like 3 [Source:MGI Symbol;Acc:MGI:2664670]	protein_coding	-1.72955	0.000351802
	Tlr3	toll-like receptor 3 [Source:MGI Symbol;Acc:MGI:2156367]	protein_coding	-1.83389	1.04526e-10
	Fut10	fucosyltransferase 10 [Source:MGI Symbol;Acc:MGI:2384748]	protein_coding	-1.97615	1.22921e-13
	Gm19410	predicted gene, 19410 [Source:MGI Symbol;Acc:MGI:5011595]	protein_coding	-2.02245	5.03549e-25
	Arhgef10	Rho guanine nucleotide exchange factor (GEF) 10 [Source:MGI Symbol;Acc:MGI:2444453]	protein_coding	-2.14364	3.79005e-33
	Kcnu1	potassium channel, subfamily U, member 1 [Source:MGI Symbol;Acc:MGI:1202300]	protein_coding	-2.16611	5.63474e-07
	Clec18a	C-type lectin domain family 18, member A [Source:MGI Symbol;Acc:MGI:2672935]	protein_coding	-2.29761	8.69964e-11
	Mylk3	myosin light chain kinase 3 [Source:MGI Symbol;Acc:MGI:2443063]	protein_coding	-2.46612	5.45104e-10
	Gm45640	predicted gene 45640 [Source:MGI Symbol;Acc:MGI:5791476]	TEC	-3.12776	0.000753553
	Adam18	a disintegrin and metallopeptidase domain 18 [Source:MGI Symbol;Acc:MGI:105986]	protein_coding	-3.35645	0.000749345
	Gm5345	predicted gene 5345 [Source:MGI Symbol;Acc:MGI:3644320]	processed_pseudogene	-3.79298	0.000757527
	Gm45702	predicted gene 45702 [Source:MGI Symbol;Acc:MGI:5804817]	lincRNA	-5.19833	0.000289129
	Gm40493	predicted gene, 40493 [Source:MGI Symbol;Acc:MGI:5623378]	antisense	-6.64981	1.35655e-06
	Gm10654	predicted gene 10654 [Source:MGI Symbol;Acc:MGI:3643366]	TEC	-6.7989	9.19682e-08
	Gm42047	predicted gene, 42047 [Source:MGI Symbol;Acc:MGI:5624932]	lincRNA	-6.91837	1.35449e-09
9	Gm6257	predicted gene 6257 [Source:MGI Symbol;Acc:MGI:3645370]	processed_pseudogene	6.10445	5.48931e-05
	Gm10080	predicted gene 10080 [Source:MGI Symbol;Acc:MGI:3710529]	processed_pseudogene	5.05693	7.05188e-23
	Gm6166	predicted gene 6166 [Source:MGI Symbol;Acc:MGI:3645893]	processed_pseudogene	4.63249	8.35781e-11
	Gm8116	predicted gene 8116 [Source:MGI Symbol;Acc:MGI:3648797]	processed_pseudogene	4.11007	0.000207492
	4933407I05Rik	RIKEN cDNA 4933407I05 gene [Source:MGI Symbol;Acc:MGI:1921322]	lincRNA	3.86939	2.22012e-06
	Gm3756	predicted gene 3756 [Source:MGI Symbol;Acc:MGI:3781931]	processed_pseudogene	3.81058	1.84717e-08
	Gm5620	predicted gene 5620 [Source:MGI Symbol;Acc:MGI:3647798]	processed_pseudogene	3.72755	0.000276999
	Gm47328	predicted gene, 47328 [Source:MGI Symbol;Acc:MGI:6096215]	lincRNA	3.00384	0.0022164
	Ackr4	atypical chemokine receptor 4 [Source:MGI Symbol;Acc:MGI:2181676]	protein_coding	2.33198	0.00133564
	Gm47113	predicted gene, 47113 [Source:MGI Symbol;Acc:MGI:6095855]	lincRNA	2.27693	4.02997e-07
	Nme9	NME/NM23 family member 9 [Source:MGI Symbol;Acc:MGI:4359686]	protein_coding	2.15128	0.00275013
	Acaa1b	acetyl-Coenzyme A acyltransferase 1B [Source:MGI Symbol;Acc:MGI:3605455]	protein_coding	1.93013	4.23333e-05
	D030055H07Rik	RIKEN cDNA D030055H07 gene [Source:MGI Symbol;Acc:MGI:3605036]	antisense	1.71302	0.000335601
	Mns1	meiosis-specific nuclear structural protein 1 [Source:MGI Symbol;Acc:MGI:107933]	protein_coding	1.51642	2.64805e-06
	Gm5617	predicted gene 5617 [Source:MGI Symbol;Acc:MGI:3643566]	protein_coding	1.14429	3.25487e-05
	Ackr2	atypical chemokine receptor 2 [Source:MGI Symbol;Acc:MGI:1891697]	protein_coding	1.11321	0.00080814
	Zmynd10	zinc finger, MYND domain containing 10 [Source:MGI Symbol;Acc:MGI:2387863]	protein_coding	1.0264	8.15537e-05
	Zfp949	zinc finger protein 949 [Source:MGI Symbol;Acc:MGI:1918890]	protein_coding	0.961634	1.94856e-09
	Nudt16	nudix (nucleoside diphosphate linked moiety X)-type motif 16 [Source:MGI Symbol;Acc:MGI:1922936]	protein_coding	0.9469	1.85243e-10
	1700048O20Rik	RIKEN cDNA 1700048O20 gene [Source:MGI Symbol;Acc:MGI:1920637]	lincRNA	0.901696	9.36066e-05
	Zfp105	zinc finger protein 105 [Source:MGI Symbol;Acc:MGI:1277119]	protein_coding	0.861315	0.000989206
	Snhg5	small nucleolar RNA host gene 5 [Source:MGI Symbol;Acc:MGI:1919905]	processed_transcript	0.842882	0.000128175
	Rwdd2a	RWD domain containing 2A [Source:MGI Symbol;Acc:MGI:1916769]	protein_coding	0.806314	5.1883e-09
	Prss35	protease, serine 35 [Source:MGI Symbol;Acc:MGI:2444800]	protein_coding	0.749471	0.00319449
	Ccdc151	coiled-coil domain containing 151 [Source:MGI Symbol;Acc:MGI:1924859]	protein_coding	0.672027	0.00221933
	Fbxl12	F-box and leucine-rich repeat protein 12 [Source:MGI Symbol;Acc:MGI:1354738]	protein_coding	0.644931	0.000631309
	Dcps	decapping enzyme, scavenger [Source:MGI Symbol;Acc:MGI:1916555]	protein_coding	0.600757	0.000871406
	Apeh	acylpeptide hydrolase [Source:MGI Symbol;Acc:MGI:88041]	protein_coding	0.505681	0.000606806
	Slc17a5	solute carrier family 17 (anion/sugar transporter), member 5 [Source:MGI Symbol;Acc:MGI:1924105]	protein_coding	0.46476	0.00140802
	Lrrc49	leucine rich repeat containing 49 [Source:MGI Symbol;Acc:MGI:2442689]	protein_coding	0.434735	5.17369e-06
	Fyco1	FYVE and coiled-coil domain containing 1 [Source:MGI Symbol;Acc:MGI:107277]	protein_coding	0.416879	0.00297059
	Tmem25	transmembrane protein 25 [Source:MGI Symbol;Acc:MGI:1918937]	protein_coding	0.39599	0.000422869
	1190002N15Rik	RIKEN cDNA 1190002N15 gene [Source:MGI Symbol;Acc:MGI:1916111]	protein_coding	0.378429	0.00252616
	Tbrg1	transforming growth factor beta regulated gene 1 [Source:MGI Symbol;Acc:MGI:1100877]	protein_coding	0.37537	0.00075303
	Pomgnt2	protein O-linked mannose beta 1,4-N-acetylglucosaminyltransferase 2 [Source:MGI Symbol;Acc:MGI:2143424]	protein_coding	0.365855	0.0040833
	A230050P20Rik	RIKEN cDNA A230050P20 gene [Source:MGI Symbol;Acc:MGI:2441788]	protein_coding	0.338329	0.000784996
	Neo1	neogenin [Source:MGI Symbol;Acc:MGI:1097159]	protein_coding	0.299641	0.00234691
	Trak1	trafficking protein, kinesin binding 1 [Source:MGI Symbol;Acc:MGI:1914345]	protein_coding	-0.258361	0.00270909
	Morf4l1	mortality factor 4 like 1 [Source:MGI Symbol;Acc:MGI:1096551]	protein_coding	-0.268471	0.00406302
	Dock3	dedicator of cyto-kinesis 3 [Source:MGI Symbol;Acc:MGI:2429763]	protein_coding	-0.306348	0.00188539
	Dpp8	dipeptidylpeptidase 8 [Source:MGI Symbol;Acc:MGI:1921638]	protein_coding	-0.308832	0.0017898
	Chst2	carbohydrate sulfotransferase 2 [Source:MGI Symbol;Acc:MGI:1891160]	protein_coding	-0.337479	7.87904e-05
	Myo6	myosin VI [Source:MGI Symbol;Acc:MGI:104785]	protein_coding	-0.346382	0.000998667
	Tpm1	tropomyosin 1, alpha [Source:MGI Symbol;Acc:MGI:98809]	protein_coding	-0.350366	4.00851e-05
	Tln2	talin 2 [Source:MGI Symbol;Acc:MGI:1917799]	protein_coding	-0.359223	9.53748e-05
	Igsf9b	immunoglobulin superfamily, member 9B [Source:MGI Symbol;Acc:MGI:2685354]	protein_coding	-0.383982	0.00126141
	Dusp7	dual specificity phosphatase 7 [Source:MGI Symbol;Acc:MGI:2387100]	protein_coding	-0.39732	0.0027372
	Phldb1	pleckstrin homology like domain, family B, member 1 [Source:MGI Symbol;Acc:MGI:2143230]	protein_coding	-0.408043	0.00186397
	Aph1b	aph1 homolog B, gamma secretase subunit [Source:MGI Symbol;Acc:MGI:3522097]	protein_coding	-0.416923	0.00121295
	Hspa8	heat shock protein 8 [Source:MGI Symbol;Acc:MGI:105384]	protein_coding	-0.457401	5.80218e-06
	Tma7	translational machinery associated 7 [Source:MGI Symbol;Acc:MGI:1913417]	protein_coding	-0.471796	3.93686e-06
	Dclk3	doublecortin-like kinase 3 [Source:MGI Symbol;Acc:MGI:3039580]	protein_coding	-0.524372	0.00174734
	Rpp25	ribonuclease P/MRP 25 subunit [Source:MGI Symbol;Acc:MGI:2143151]	protein_coding	-0.560191	0.00102768
	Clmp	CXADR-like membrane protein [Source:MGI Symbol;Acc:MGI:1918816]	protein_coding	-0.569447	0.00042658
	Limd1	LIM domains containing 1 [Source:MGI Symbol;Acc:MGI:1352502]	protein_coding	-0.573593	0.00291262
	Sc5d	sterol-C5-desaturase [Source:MGI Symbol;Acc:MGI:1353611]	protein_coding	-0.582431	8.94273e-08
	Mcam	melanoma cell adhesion molecule [Source:MGI Symbol;Acc:MGI:1933966]	protein_coding	-0.586882	0.00206837
	Ctsh	cathepsin H [Source:MGI Symbol;Acc:MGI:107285]	protein_coding	-0.615981	0.000834006
	Mlh1	mutL homolog 1 [Source:MGI Symbol;Acc:MGI:101938]	protein_coding	-0.618502	0.00162278
	Uaca	uveal autoantigen with coiled-coil domains and ankyrin repeats [Source:MGI Symbol;Acc:MGI:1919815]	protein_coding	-0.643995	0.00231063
	Abhd14a	abhydrolase domain containing 14A [Source:MGI Symbol;Acc:MGI:1915894]	protein_coding	-0.660993	9.83848e-07
	Traip	TRAF-interacting protein [Source:MGI Symbol;Acc:MGI:1096377]	protein_coding	-0.681019	1.68089e-05
	Mrpl3	mitochondrial ribosomal protein L3 [Source:MGI Symbol;Acc:MGI:2137204]	protein_coding	-0.732806	1.13069e-11
	Mobp	myelin-associated oligodendrocytic basic protein [Source:MGI Symbol;Acc:MGI:108511]	protein_coding	-0.75312	2.31733e-08
	Gm17322	predicted gene, 17322 [Source:MGI Symbol;Acc:MGI:4936956]	lincRNA	-0.7728	0.00275059
	Filip1	filamin A interacting protein 1 [Source:MGI Symbol;Acc:MGI:1917848]	protein_coding	-0.807531	0.00059586
	Ppm1m	protein phosphatase 1M [Source:MGI Symbol;Acc:MGI:1915155]	protein_coding	-0.821095	8.98964e-07
	AC160637.1	novel transcript	TEC	-0.868065	0.000193712
	Vstm5	V-set and transmembrane domain containing 5 [Source:MGI Symbol;Acc:MGI:1916387]	protein_coding	-0.901873	4.78974e-06
	Acaa1a	acetyl-Coenzyme A acyltransferase 1A [Source:MGI Symbol;Acc:MGI:2148491]	protein_coding	-0.945751	4.86526e-19
	Rbp1	retinol binding protein 1, cellular [Source:MGI Symbol;Acc:MGI:97876]	protein_coding	-0.949237	3.72433e-06
	Kdelc2	KDEL (Lys-Asp-Glu-Leu) containing 2 [Source:MGI Symbol;Acc:MGI:1923765]	protein_coding	-0.972214	9.49009e-05
	Cyp11a1	cytochrome P450, family 11, subfamily a, polypeptide 1 [Source:MGI Symbol;Acc:MGI:88582]	protein_coding	-1.01279	0.00106775
	Nmnat3	nicotinamide nucleotide adenylyltransferase 3 [Source:MGI Symbol;Acc:MGI:1921330]	protein_coding	-1.21044	0.00364156
	Poc1a	POC1 centriolar protein A [Source:MGI Symbol;Acc:MGI:1917485]	protein_coding	-1.34768	5.53643e-14
	Plscr4	phospholipid scramblase 4 [Source:MGI Symbol;Acc:MGI:2143267]	protein_coding	-1.55236	0.00066521
	Gm19531	predicted gene, 19531 [Source:MGI Symbol;Acc:MGI:5011716]	antisense	-1.7313	5.85197e-08
	Col6a4	collagen, type VI, alpha 4 [Source:MGI Symbol;Acc:MGI:1915803]	protein_coding	-1.79178	4.78384e-07
	Trim71	tripartite motif-containing 71 [Source:MGI Symbol;Acc:MGI:2685973]	protein_coding	-2.09397	0.000139531
	Rpl29	ribosomal protein L29 [Source:MGI Symbol;Acc:MGI:99687]	protein_coding	-2.28787	1.50758e-91
	Cryab	crystallin, alpha B [Source:MGI Symbol;Acc:MGI:88516]	protein_coding	-2.63783	1.92419e-65
	9330159M07Rik	RIKEN cDNA 9330159M07 gene [Source:MGI Symbol;Acc:MGI:2442519]	processed_transcript	-2.65433	0.000136449
	Gm42756	predicted gene 42756 [Source:MGI Symbol;Acc:MGI:5662893]	antisense	-3.11613	6.87682e-06
	C920006O11Rik	RIKEN cDNA C920006O11 gene [Source:MGI Symbol;Acc:MGI:2443759]	lincRNA	-3.52814	4.10015e-08
	Fbxw15	F-box and WD-40 domain protein 15 [Source:MGI Symbol;Acc:MGI:3505701]	protein_coding	-3.87417	0.000478498
	Gm10642	predicted gene 10642 [Source:MGI Symbol;Acc:MGI:3704338]	protein_coding	-5.11973	0.00218268
	9430037G07Rik	RIKEN cDNA 9430037G07 gene [Source:MGI Symbol;Acc:MGI:2444544]	lincRNA	-5.17682	0.000279322
	Gm48784	predicted gene, 48784 [Source:MGI Symbol;Acc:MGI:6098483]	lincRNA	-5.91342	6.41919e-05
	Gm43622	predicted gene 43622 [Source:MGI Symbol;Acc:MGI:5663759]	TEC	-6.7238	1.0932e-06
	Gm10635	predicted gene 10635 [Source:MGI Symbol;Acc:MGI:3641740]	lincRNA	-7.24575	7.21387e-08
	Gm40518	predicted gene, 40518 [Source:MGI Symbol;Acc:MGI:5623403]	lincRNA	-8.5508	5.18415e-12
10	Gm9855	predicted pseudogene 9855 [Source:MGI Symbol;Acc:MGI:3704357]	processed_pseudogene	7.5226	4.53657e-18
	Amd2	S-adenosylmethionine decarboxylase 2 [Source:MGI Symbol;Acc:MGI:1333111]	protein_coding	5.83711	4.18826e-76
	Gm9770	predicted gene 9770 [Source:MGI Symbol;Acc:MGI:3708545]	processed_pseudogene	5.10079	6.64945e-11
	Gm33543	predicted gene, 33543 [Source:MGI Symbol;Acc:MGI:5592702]	protein_coding	2.94159	0.000707144
	Cfap54	cilia and flagella associated protein 54 [Source:MGI Symbol;Acc:MGI:1922208]	protein_coding	1.87614	2.23453e-24
	Gipc3	GIPC PDZ domain containing family, member 3 [Source:MGI Symbol;Acc:MGI:2387006]	protein_coding	1.10192	0.00389902
	Pcbd1	pterin 4 alpha carbinolamine dehydratase/dimerization cofactor of hepatocyte nuclear factor 1 alpha (TCF1) 1 [Source:MGI Symbol;Acc:MGI:94873]	protein_coding	1.04988	0.000151552
	Ahi1	Abelson helper integration site 1 [Source:MGI Symbol;Acc:MGI:87971]	protein_coding	1.04215	3.85296e-16
	Cep290	centrosomal protein 290 [Source:MGI Symbol;Acc:MGI:2384917]	protein_coding	0.981762	5.04277e-06
	Slc1a6	solute carrier family 1 (high affinity aspartate/glutamate transporter), member 6 [Source:MGI Symbol;Acc:MGI:1096331]	protein_coding	0.834889	6.47596e-06
	Mfsd12	major facilitator superfamily domain containing 12 [Source:MGI Symbol;Acc:MGI:3604804]	protein_coding	0.808889	2.07683e-07
	Pcsk4	proprotein convertase subtilisin/kexin type 4 [Source:MGI Symbol;Acc:MGI:97514]	protein_coding	0.753408	0.00170527
	Vip	vasoactive intestinal polypeptide [Source:MGI Symbol;Acc:MGI:98933]	protein_coding	0.680439	4.90478e-06
	Sgk1	serum/glucocorticoid regulated kinase 1 [Source:MGI Symbol;Acc:MGI:1340062]	protein_coding	0.651344	1.52461e-05
	Ipcef1	interaction protein for cytohesin exchange factors 1 [Source:MGI Symbol;Acc:MGI:2444159]	protein_coding	0.614483	6.76941e-07
	Ntn4	netrin 4 [Source:MGI Symbol;Acc:MGI:1888978]	protein_coding	0.601522	0.00236894
	Myl6b	myosin, light polypeptide 6B [Source:MGI Symbol;Acc:MGI:1917789]	protein_coding	0.584292	3.81158e-05
	Col6a2	collagen, type VI, alpha 2 [Source:MGI Symbol;Acc:MGI:88460]	protein_coding	0.560704	0.000614689
	Ankrd24	ankyrin repeat domain 24 [Source:MGI Symbol;Acc:MGI:1890394]	protein_coding	0.558907	5.49006e-05
	Esyt1	extended synaptotagmin-like protein 1 [Source:MGI Symbol;Acc:MGI:1344426]	protein_coding	0.545294	0.00182007
	Pym1	PYM homolog 1, exon junction complex associated factor [Source:MGI Symbol;Acc:MGI:1925678]	protein_coding	0.478052	0.000287539
	Matk	megakaryocyte-associated tyrosine kinase [Source:MGI Symbol;Acc:MGI:99259]	protein_coding	0.340516	0.00115849
	Ank3	ankyrin 3, epithelial [Source:MGI Symbol;Acc:MGI:88026]	protein_coding	-0.252366	0.00361803
	Amd1	S-adenosylmethionine decarboxylase 1 [Source:MGI Symbol;Acc:MGI:88004]	protein_coding	-0.308784	0.00174772
	Snrpd3	small nuclear ribonucleoprotein D3 [Source:MGI Symbol;Acc:MGI:1914582]	protein_coding	-0.322316	0.0018729
	Midn	midnolin [Source:MGI Symbol;Acc:MGI:1890222]	protein_coding	-0.333276	0.00318116
	Map7	microtubule-associated protein 7 [Source:MGI Symbol;Acc:MGI:1328328]	protein_coding	-0.34173	0.00249738
	Kif5a	kinesin family member 5A [Source:MGI Symbol;Acc:MGI:109564]	protein_coding	-0.351201	0.000241855
	Bcr	breakpoint cluster region [Source:MGI Symbol;Acc:MGI:88141]	protein_coding	-0.362383	0.000510366
	Zfp365	zinc finger protein 365 [Source:MGI Symbol;Acc:MGI:2143676]	protein_coding	-0.408303	0.00307914
	Pdxk	pyridoxal (pyridoxine, vitamin B6) kinase [Source:MGI Symbol;Acc:MGI:1351869]	protein_coding	-0.411556	0.00020687
	Pwp1	PWP1 homolog, endonuclein [Source:MGI Symbol;Acc:MGI:1914735]	protein_coding	-0.423856	0.00363577
	Sarnp	SAP domain containing ribonucleoprotein [Source:MGI Symbol;Acc:MGI:1913368]	protein_coding	-0.473001	0.00119768
	Actr6	ARP6 actin-related protein 6 [Source:MGI Symbol;Acc:MGI:1914269]	protein_coding	-0.493504	0.00314493
	Vsir	V-set immunoregulatory receptor [Source:MGI Symbol;Acc:MGI:1921298]	protein_coding	-0.521812	5.82037e-05
	Lingo3	leucine rich repeat and Ig domain containing 3 [Source:MGI Symbol;Acc:MGI:3609246]	protein_coding	-0.540978	0.00049752
	Rps26	ribosomal protein S26 [Source:MGI Symbol;Acc:MGI:1351628]	protein_coding	-0.577724	5.42932e-08
	Ptprb	protein tyrosine phosphatase, receptor type, B [Source:MGI Symbol;Acc:MGI:97809]	protein_coding	-0.592805	0.000148177
	Arhgap45	Rho GTPase activating protein 45 [Source:MGI Symbol;Acc:MGI:1917969]	protein_coding	-0.655514	0.000802344
	Mettl1	methyltransferase like 1 [Source:MGI Symbol;Acc:MGI:1339986]	protein_coding	-0.732862	0.000765461
	Erbb3	erb-b2 receptor tyrosine kinase 3 [Source:MGI Symbol;Acc:MGI:95411]	protein_coding	-0.785637	0.00040806
	Gstt1	glutathione S-transferase, theta 1 [Source:MGI Symbol;Acc:MGI:107379]	protein_coding	-0.798215	0.000282422
	Cradd	CASP2 and RIPK1 domain containing adaptor with death domain [Source:MGI Symbol;Acc:MGI:1336168]	protein_coding	-0.843934	0.00135402
	Plekhg1	pleckstrin homology domain containing, family G (with RhoGef domain) member 1 [Source:MGI Symbol;Acc:MGI:2676551]	protein_coding	-0.873612	0.00129121
	E130307A14Rik	RIKEN cDNA E130307A14 gene [Source:MGI Symbol;Acc:MGI:3036287]	antisense	-0.912339	2.13886e-08
	Enpp1	ectonucleotide pyrophosphatase/phosphodiesterase 1 [Source:MGI Symbol;Acc:MGI:97370]	protein_coding	-0.919651	0.001
	Krr1	KRR1, small subunit (SSU) processome component, homolog (yeast) [Source:MGI Symbol;Acc:MGI:1289274]	protein_coding	-0.920073	1.99589e-09
	Hint3	histidine triad nucleotide binding protein 3 [Source:MGI Symbol;Acc:MGI:1914097]	protein_coding	-1.00331	0.00101247
	Tpd52l1	tumor protein D52-like 1 [Source:MGI Symbol;Acc:MGI:1298386]	protein_coding	-1.04244	2.78038e-09
	1190007I07Rik	RIKEN cDNA 1190007I07 gene [Source:MGI Symbol;Acc:MGI:3698433]	protein_coding	-1.04539	0.000278175
	Izumo4	IZUMO family member 4 [Source:MGI Symbol;Acc:MGI:1918814]	protein_coding	-1.38423	7.34182e-16
	Gm20300	predicted gene, 20300 [Source:MGI Symbol;Acc:MGI:5012485]	lincRNA	-1.40805	1.02894e-17
	Samd3	sterile alpha motif domain containing 3 [Source:MGI Symbol;Acc:MGI:2685469]	protein_coding	-1.90422	0.000308269
	Gm10275	predicted pseudogene 10275 [Source:MGI Symbol;Acc:MGI:3704354]	transcribed_processed_pseudogene	-1.9218	6.39254e-05
	Tdg	thymine DNA glycosylase [Source:MGI Symbol;Acc:MGI:108247]	protein_coding	-2.03126	1.11748e-49
	Gm3055	predicted gene 3055 [Source:MGI Symbol;Acc:MGI:3809197]	protein_coding	-2.5042	0.00183254
	1110002J07Rik	RIKEN cDNA 1110002J07 gene [Source:MGI Symbol;Acc:MGI:1915738]	lincRNA	-2.52805	0.00206588
	Gm47917	predicted gene, 47917 [Source:MGI Symbol;Acc:MGI:6097168]	antisense	-3.52849	0.00372936
	Theg	testicular haploid expressed gene [Source:MGI Symbol;Acc:MGI:1338756]	protein_coding	-4.60628	0.00289821
	Gm7672	predicted gene 7672 [Source:MGI Symbol;Acc:MGI:3647232]	processed_pseudogene	-5.14369	0.00194897
	Gm36283	predicted gene, 36283 [Source:MGI Symbol;Acc:MGI:5595442]	lincRNA	-6.03918	4.05233e-05
11	Gm11425	predicted gene 11425 [Source:MGI Symbol;Acc:MGI:3650957]	processed_pseudogene	8.89153	5.0482e-56
	Gm11702	predicted gene 11702 [Source:MGI Symbol;Acc:MGI:3649846]	processed_pseudogene	8.33275	2.3071e-15
	Hmga1b	high mobility group AT-hook 1B [Source:MGI Symbol;Acc:MGI:96161]	protein_coding	6.77636	2.39773e-64
	Gm12245	predicted gene 12245 [Source:MGI Symbol;Acc:MGI:3649494]	processed_pseudogene	5.8462	0.000139175
	Gm12226	predicted pseudogene 12226 [Source:MGI Symbol;Acc:MGI:3649742]	processed_pseudogene	5.56583	1.76208e-16
	Gm6685	predicted pseudogene 6685 [Source:MGI Symbol;Acc:MGI:3704119]	protein_coding	5.44383	0.0001471
	BC053393	cDNA sequence BC053393 [Source:MGI Symbol;Acc:MGI:3039605]	protein_coding	5.35427	0.00125138
	Gh	growth hormone [Source:MGI Symbol;Acc:MGI:95707]	protein_coding	4.88773	0.00146929
	P2rx1	purinergic receptor P2X, ligand-gated ion channel, 1 [Source:MGI Symbol;Acc:MGI:1098235]	protein_coding	2.33275	0.00056091
	Hbq1a	hemoglobin, theta 1A [Source:MGI Symbol;Acc:MGI:2685722]	protein_coding	2.33241	0.0007127
	Ccl9	chemokine (C-C motif) ligand 9 [Source:MGI Symbol;Acc:MGI:104533]	protein_coding	2.07822	9.09221e-16
	Meox1	mesenchyme homeobox 1 [Source:MGI Symbol;Acc:MGI:103220]	protein_coding	2.03566	0.00025072
	Pde6g	phosphodiesterase 6G, cGMP-specific, rod, gamma [Source:MGI Symbol;Acc:MGI:97526]	protein_coding	1.96688	0.00381638
	Mycbpap	MYCBP associated protein [Source:MGI Symbol;Acc:MGI:2388726]	protein_coding	1.70543	3.17384e-09
	Galr2	galanin receptor 2 [Source:MGI Symbol;Acc:MGI:1337018]	protein_coding	1.67758	0.00178476
	AA465934	expressed sequence AA465934 [Source:MGI Symbol;Acc:MGI:2671018]	processed_transcript	1.61889	1.38795e-05
	Gm12346	predicted gene 12346 [Source:MGI Symbol;Acc:MGI:3649810]	transcribed_processed_pseudogene	1.48725	8.89668e-09
	4930563E22Rik	RIKEN cDNA 4930563E22 gene [Source:MGI Symbol;Acc:MGI:1922554]	processed_transcript	1.46109	1.39346e-05
	Gck	glucokinase [Source:MGI Symbol;Acc:MGI:1270854]	protein_coding	1.41593	0.00123142
	Kcnab3	potassium voltage-gated channel, shaker-related subfamily, beta member 3 [Source:MGI Symbol;Acc:MGI:1336208]	protein_coding	0.962474	1.853e-12
	Hba-a1	hemoglobin alpha, adult chain 1 [Source:MGI Symbol;Acc:MGI:96015]	protein_coding	0.913691	1.57489e-13
	D11Wsu47e	DNA segment, Chr 11, Wayne State University 47, expressed [Source:MGI Symbol;Acc:MGI:106356]	protein_coding	0.816976	7.83646e-06
	Pik3r6	phosphoinositide-3-kinase regulatory subunit 5 [Source:MGI Symbol;Acc:MGI:2144613]	protein_coding	0.77877	0.00398038
	Alox12b	arachidonate 12-lipoxygenase, 12R type [Source:MGI Symbol;Acc:MGI:1274782]	protein_coding	0.770466	0.00274162
	B9d1	B9 protein domain 1 [Source:MGI Symbol;Acc:MGI:1351471]	protein_coding	0.763332	1.42872e-06
	Rnf135	ring finger protein 135 [Source:MGI Symbol;Acc:MGI:1919206]	protein_coding	0.757654	0.00184956
	Gm45605	predicted gene 45605 [Source:MGI Symbol;Acc:MGI:5791441]	lincRNA	0.737127	0.00263819
	Adam19	a disintegrin and metallopeptidase domain 19 (meltrin beta) [Source:MGI Symbol;Acc:MGI:105377]	protein_coding	0.728904	3.67933e-06
	1700052K11Rik	RIKEN cDNA 1700052K11 gene [Source:MGI Symbol;Acc:MGI:1920681]	antisense	0.686637	0.000701149
	Zfp692	zinc finger protein 692 [Source:MGI Symbol;Acc:MGI:2144276]	protein_coding	0.680606	4.88628e-08
	Hexim2	hexamethylene bis-acetamide inducible 2 [Source:MGI Symbol;Acc:MGI:1918309]	protein_coding	0.629305	0.000495698
	Snrnp25	small nuclear ribonucleoprotein 25 (U11/U12) [Source:MGI Symbol;Acc:MGI:1925622]	protein_coding	0.538367	0.000169793
	Coro6	coronin 6 [Source:MGI Symbol;Acc:MGI:2183448]	protein_coding	0.523526	1.68837e-05
	Sco1	SCO1 cytochrome c oxidase assembly protein [Source:MGI Symbol;Acc:MGI:106362]	protein_coding	0.511551	0.00273339
	Nat9	N-acetyltransferase 9 (GCN5-related, putative) [Source:MGI Symbol;Acc:MGI:1913426]	protein_coding	0.509034	0.000239523
	Snx11	sorting nexin 11 [Source:MGI Symbol;Acc:MGI:1921729]	protein_coding	0.502256	9.0838e-05
	Pnpo	pyridoxine 5'-phosphate oxidase [Source:MGI Symbol;Acc:MGI:2144151]	protein_coding	0.466811	0.00024205
	Rnf227	ring finger protein 227 [Source:MGI Symbol;Acc:MGI:1915359]	protein_coding	0.466364	5.32812e-07
	Cacna1g	calcium channel, voltage-dependent, T type, alpha 1G subunit [Source:MGI Symbol;Acc:MGI:1201678]	protein_coding	0.44357	0.000154885
	Jpt1	Jupiter microtubule associated homolog 1 [Source:MGI Symbol;Acc:MGI:1096361]	protein_coding	0.414585	4.47958e-05
	Nefh	neurofilament, heavy polypeptide [Source:MGI Symbol;Acc:MGI:97309]	protein_coding	0.412063	0.00277909
	Slc16a11	solute carrier family 16 (monocarboxylic acid transporters), member 11 [Source:MGI Symbol;Acc:MGI:2663709]	protein_coding	0.40983	0.00314263
	Fn3krp	fructosamine 3 kinase related protein [Source:MGI Symbol;Acc:MGI:2679256]	protein_coding	0.369925	0.00146223
	Pigs	phosphatidylinositol glycan anchor biosynthesis, class S [Source:MGI Symbol;Acc:MGI:2687325]	protein_coding	0.347641	0.00174968
	Lrrc45	leucine rich repeat containing 45 [Source:MGI Symbol;Acc:MGI:2387183]	protein_coding	0.336839	0.00410487
	Sgsm2	small G protein signaling modulator 2 [Source:MGI Symbol;Acc:MGI:2144695]	protein_coding	0.303691	0.000480961
	Nudcd3	NudC domain containing 3 [Source:MGI Symbol;Acc:MGI:2144158]	protein_coding	0.278274	0.00222444
	Ppia	peptidylprolyl isomerase A [Source:MGI Symbol;Acc:MGI:97749]	protein_coding	0.250131	0.00238776
	Synrg	synergin, gamma [Source:MGI Symbol;Acc:MGI:1354742]	protein_coding	-0.295401	0.00321944
	9530068E07Rik	RIKEN cDNA 9530068E07 gene [Source:MGI Symbol;Acc:MGI:2654705]	protein_coding	-0.302831	0.00321739
	Git1	G protein-coupled receptor kinase-interactor 1 [Source:MGI Symbol;Acc:MGI:1927140]	protein_coding	-0.30745	0.000423856
	Hlf	hepatic leukemia factor [Source:MGI Symbol;Acc:MGI:96108]	protein_coding	-0.313756	0.00137112
	Per1	period circadian clock 1 [Source:MGI Symbol;Acc:MGI:1098283]	protein_coding	-0.332676	0.00015517
	Mnt	max binding protein [Source:MGI Symbol;Acc:MGI:109150]	protein_coding	-0.333021	0.00404899
	Vmp1	vacuole membrane protein 1 [Source:MGI Symbol;Acc:MGI:1923159]	protein_coding	-0.336643	0.00198726
	Guk1	guanylate kinase 1 [Source:MGI Symbol;Acc:MGI:95871]	protein_coding	-0.417444	0.000214298
	Acaca	acetyl-Coenzyme A carboxylase alpha [Source:MGI Symbol;Acc:MGI:108451]	protein_coding	-0.422217	4.53837e-05
	Nr1d1	nuclear receptor subfamily 1, group D, member 1 [Source:MGI Symbol;Acc:MGI:2444210]	protein_coding	-0.433548	2.66364e-05
	Rasl10a	RAS-like, family 10, member A [Source:MGI Symbol;Acc:MGI:1922918]	protein_coding	-0.434342	0.000290425
	Ypel2	yippee like 2 [Source:MGI Symbol;Acc:MGI:1925114]	protein_coding	-0.444914	0.000631996
	Cnp	2',3'-cyclic nucleotide 3' phosphodiesterase [Source:MGI Symbol;Acc:MGI:88437]	protein_coding	-0.454868	0.000534524
	Tbc1d16	TBC1 domain family, member 16 [Source:MGI Symbol;Acc:MGI:2652878]	protein_coding	-0.464717	0.000337154
	Ccm2	cerebral cavernous malformation 2 [Source:MGI Symbol;Acc:MGI:2384924]	protein_coding	-0.475	1.83411e-05
	Cfap36	cilia and flagella associated protein 36 [Source:MGI Symbol;Acc:MGI:1913994]	protein_coding	-0.477819	1.74586e-05
	Spred2	sprouty-related, EVH1 domain containing 2 [Source:MGI Symbol;Acc:MGI:2150019]	protein_coding	-0.481873	3.99462e-06
	Rflnb	refilin B [Source:MGI Symbol;Acc:MGI:1923816]	protein_coding	-0.511352	0.00245383
	Dusp14	dual specificity phosphatase 14 [Source:MGI Symbol;Acc:MGI:1927168]	protein_coding	-0.513165	5.55106e-05
	Cisd3	CDGSH iron sulfur domain 3 [Source:MGI Symbol;Acc:MGI:101788]	protein_coding	-0.531196	0.000363973
	Fads6	fatty acid desaturase domain family, member 6 [Source:MGI Symbol;Acc:MGI:3039592]	protein_coding	-0.567708	0.000434179
	Gjc2	gap junction protein, gamma 2 [Source:MGI Symbol;Acc:MGI:2153060]	protein_coding	-0.585535	0.000652262
	Plek	pleckstrin [Source:MGI Symbol;Acc:MGI:1860485]	protein_coding	-0.585974	0.00277464
	B230217C12Rik	RIKEN cDNA B230217C12 gene [Source:MGI Symbol;Acc:MGI:1915377]	protein_coding	-0.592408	1.83042e-06
	Arsg	arylsulfatase G [Source:MGI Symbol;Acc:MGI:1921258]	protein_coding	-0.599315	0.000267463
	Cd68	CD68 antigen [Source:MGI Symbol;Acc:MGI:88342]	protein_coding	-0.611697	0.00376143
	Sh3pxd2b	SH3 and PX domains 2B [Source:MGI Symbol;Acc:MGI:2442062]	protein_coding	-0.640958	3.28762e-05
	Eml6	echinoderm microtubule associated protein like 6 [Source:MGI Symbol;Acc:MGI:2442895]	protein_coding	-0.659413	8.80847e-05
	Ikzf1	IKAROS family zinc finger 1 [Source:MGI Symbol;Acc:MGI:1342540]	protein_coding	-0.795974	0.00333476
	Aspa	aspartoacylase [Source:MGI Symbol;Acc:MGI:87914]	protein_coding	-0.815382	0.000160489
	Mfap3	microfibrillar-associated protein 3 [Source:MGI Symbol;Acc:MGI:1924068]	protein_coding	-0.872424	8.14288e-10
	2610035D17Rik	RIKEN cDNA 2610035D17 gene [Source:MGI Symbol;Acc:MGI:1919636]	lincRNA	-0.885274	1.19969e-06
	B3gnt2	UDP-GlcNAc:betaGal beta-1,3-N-acetylglucosaminyltransferase 2 [Source:MGI Symbol;Acc:MGI:1889505]	protein_coding	-1.05449	0.00123666
	Nipal4	NIPA-like domain containing 4 [Source:MGI Symbol;Acc:MGI:2444671]	protein_coding	-1.34748	8.47017e-06
	BC006965	cDNA sequence BC006965 [Source:MGI Symbol;Acc:MGI:2384955]	processed_transcript	-1.47021	0.00017836
	Cd300a	CD300A molecule [Source:MGI Symbol;Acc:MGI:2443411]	protein_coding	-1.60884	0.00124072
	Irgm2	immunity-related GTPase family M member 2 [Source:MGI Symbol;Acc:MGI:1926262]	protein_coding	-1.65217	2.89789e-05
	A430108G06Rik	RIKEN cDNA A430108G06 gene [Source:MGI Symbol;Acc:MGI:2442478]	processed_transcript	-1.76182	0.000537756
	Wfdc18	WAP four-disulfide core domain 18 [Source:MGI Symbol;Acc:MGI:107506]	protein_coding	-1.81428	0.00258596
	Slfn5	schlafen 5 [Source:MGI Symbol;Acc:MGI:1329004]	protein_coding	-1.88741	3.12553e-08
	B230206L02Rik	RIKEN cDNA B230206L02 gene [Source:MGI Symbol;Acc:MGI:1924598]	processed_transcript	-2.00388	0.00228679
	Krt9	keratin 9 [Source:MGI Symbol;Acc:MGI:96696]	protein_coding	-2.12504	8.1989e-15
	2900041M22Rik	RIKEN cDNA 2900041M22 gene [Source:MGI Symbol;Acc:MGI:1925653]	processed_transcript	-2.28423	0.00142838
	9130017K11Rik	RIKEN cDNA 9130017K11 gene [Source:MGI Symbol;Acc:MGI:1926030]	processed_transcript	-2.50097	0.00327399
	Gm12031	predicted gene 12031 [Source:MGI Symbol;Acc:MGI:3651406]	lincRNA	-2.70567	5.6167e-06
	2310058D17Rik	RIKEN cDNA 2310058D17 gene [Source:MGI Symbol;Acc:MGI:1922944]	processed_transcript	-3.00671	3.34476e-09
	Gm9796	predicted gene 9796 [Source:MGI Symbol;Acc:MGI:3648412]	lincRNA	-3.29349	1.31888e-05
	Cpsf4l	cleavage and polyadenylation specific factor 4-like [Source:MGI Symbol;Acc:MGI:1277182]	protein_coding	-3.7873	2.84026e-08
	2610507I01Rik	RIKEN cDNA 2610507I01 gene [Source:MGI Symbol;Acc:MGI:1919453]	processed_transcript	-4.17989	1.34055e-23
	Etaa1os	Ewing tumor-associated antigen 1, opposite strand [Source:MGI Symbol;Acc:MGI:1920221]	antisense	-4.78019	0.00151122
	Epx	eosinophil peroxidase [Source:MGI Symbol;Acc:MGI:107569]	protein_coding	-5.02855	0.00362339
	Gm12576	predicted gene 12576 [Source:MGI Symbol;Acc:MGI:3650616]	lincRNA	-5.22205	0.00164684
	Nlrp1b	NLR family, pyrin domain containing 1B [Source:MGI Symbol;Acc:MGI:3582959]	protein_coding	-5.48657	0.000680068
	Gm11427	predicted gene 11427 [Source:MGI Symbol;Acc:MGI:3651774]	transcribed_unprocessed_pseudogene	-5.55457	0.00055111
	Gm8738	predicted gene 8738 [Source:MGI Symbol;Acc:MGI:3644778]	processed_pseudogene	-5.58306	9.14834e-05
	Tgtp1	T cell specific GTPase 1 [Source:MGI Symbol;Acc:MGI:98734]	protein_coding	-5.64991	0.000337153
	Pttg1	pituitary tumor-transforming gene 1 [Source:MGI Symbol;Acc:MGI:1353578]	protein_coding	-6.5097	5.55743e-51
	Olfr316	olfactory receptor 316 [Source:MGI Symbol;Acc:MGI:3030150]	protein_coding	-7.10993	7.34133e-08
12	Gm6969	predicted pseudogene 6969 [Source:MGI Symbol;Acc:MGI:3645320]	processed_pseudogene	9.02591	1.07183e-58
	Serpina3h	serine (or cysteine) peptidase inhibitor, clade A, member 3H [Source:MGI Symbol;Acc:MGI:2182839]	transcribed_unprocessed_pseudogene	7.58772	4.90406e-09
	Mir8099-2	microRNA 8099-2 [Source:MGI Symbol;Acc:MGI:5531074]	miRNA	7.3847	2.82874e-08
	Ighg2b	immunoglobulin heavy constant gamma 2B [Source:MGI Symbol;Acc:MGI:96445]	IG_C_gene	6.87346	5.10861e-07
	Serpina3m	serine (or cysteine) peptidase inhibitor, clade A, member 3M [Source:MGI Symbol;Acc:MGI:98378]	protein_coding	6.40639	8.48605e-06
	Gm9260	predicted gene 9260 [Source:MGI Symbol;Acc:MGI:3645725]	processed_pseudogene	5.71758	0.000357888
	Gm6768	predicted gene 6768 [Source:MGI Symbol;Acc:MGI:3648259]	processed_pseudogene	5.6512	1.45044e-33
	Gm4864	predicted gene 4864 [Source:MGI Symbol;Acc:MGI:3643492]	processed_pseudogene	4.95098	7.59028e-05
	Gm5182	predicted gene 5182 [Source:MGI Symbol;Acc:MGI:3649174]	processed_pseudogene	4.71384	1.28371e-10
	B830012L14Rik	RIKEN cDNA B830012L14 gene [Source:MGI Symbol;Acc:MGI:2443332]	lincRNA	4.33708	2.48345e-07
	Gm6682	predicted gene 6682 [Source:MGI Symbol;Acc:MGI:3647156]	processed_pseudogene	2.51837	0.000976653
	A530016L24Rik	RIKEN cDNA A530016L24 gene [Source:MGI Symbol;Acc:MGI:2443020]	protein_coding	2.35199	1.34849e-06
	Lbhd2	LBH domain containing 2 [Source:MGI Symbol;Acc:MGI:2685744]	protein_coding	2.22789	0.000127412
	Bdkrb2	bradykinin receptor, beta 2 [Source:MGI Symbol;Acc:MGI:102845]	protein_coding	1.65964	6.39387e-07
	L3hypdh	L-3-hydroxyproline dehydratase (trans-) [Source:MGI Symbol;Acc:MGI:1914467]	protein_coding	1.50576	8.15333e-09
	Serpina3n	serine (or cysteine) peptidase inhibitor, clade A, member 3N [Source:MGI Symbol;Acc:MGI:105045]	protein_coding	1.45092	3.88947e-15
	Ak7	adenylate kinase 7 [Source:MGI Symbol;Acc:MGI:1926051]	protein_coding	1.18988	0.000506099
	Gm30025	predicted gene, 30025 [Source:MGI Symbol;Acc:MGI:5589184]	antisense	1.09104	0.000534464
	Adi1	acireductone dioxygenase 1 [Source:MGI Symbol;Acc:MGI:2144929]	protein_coding	1.03492	2.63933e-20
	Gon7	GON7, KEOPS complex subunit homolog [Source:MGI Symbol;Acc:MGI:4845848]	protein_coding	1.02134	1.37361e-06
	9330151L19Rik	RIKEN cDNA 9330151L19 gene [Source:MGI Symbol;Acc:MGI:3041168]	bidirectional_promoter_lncRNA	1.01547	2.23721e-11
	Clba1	clathrin binding box of aftiphilin containing 1 [Source:MGI Symbol;Acc:MGI:2443738]	protein_coding	0.565866	0.000106591
	Ifrd1	interferon-related developmental regulator 1 [Source:MGI Symbol;Acc:MGI:1316717]	protein_coding	0.546223	2.91642e-05
	Taf1b	TATA-box binding protein associated factor, RNA polymerase I, B [Source:MGI Symbol;Acc:MGI:109577]	protein_coding	0.512045	0.000637202
	Acot1	acyl-CoA thioesterase 1 [Source:MGI Symbol;Acc:MGI:1349396]	protein_coding	0.500374	0.00349356
	Id2	inhibitor of DNA binding 2 [Source:MGI Symbol;Acc:MGI:96397]	protein_coding	0.319776	0.00208624
	Wars	tryptophanyl-tRNA synthetase [Source:MGI Symbol;Acc:MGI:104630]	protein_coding	-0.29355	0.00302941
	Dnajc27	DnaJ heat shock protein family (Hsp40) member C27 [Source:MGI Symbol;Acc:MGI:2443036]	protein_coding	-0.316397	0.00346044
	Tmem179	transmembrane protein 179 [Source:MGI Symbol;Acc:MGI:2144891]	protein_coding	-0.322697	0.00384055
	Tmed8	transmembrane p24 trafficking protein 8 [Source:MGI Symbol;Acc:MGI:1923480]	protein_coding	-0.326887	0.00306806
	Ywhaq	tyrosine 3-monooxygenase/tryptophan 5-monooxygenase activation protein theta [Source:MGI Symbol;Acc:MGI:891963]	protein_coding	-0.33881	2.04312e-05
	Pacs2	phosphofurin acidic cluster sorting protein 2 [Source:MGI Symbol;Acc:MGI:1924399]	protein_coding	-0.344142	0.00122275
	Tmx1	thioredoxin-related transmembrane protein 1 [Source:MGI Symbol;Acc:MGI:1919986]	protein_coding	-0.365887	0.00158563
	Dio2	deiodinase, iodothyronine, type II [Source:MGI Symbol;Acc:MGI:1338833]	protein_coding	-0.377651	0.00403681
	Npc2	NPC intracellular cholesterol transporter 2 [Source:MGI Symbol;Acc:MGI:1915213]	protein_coding	-0.404518	0.00100713
	Kcnf1	potassium voltage-gated channel, subfamily F, member 1 [Source:MGI Symbol;Acc:MGI:2687399]	protein_coding	-0.406284	8.63212e-06
	Ccdc88c	coiled-coil domain containing 88C [Source:MGI Symbol;Acc:MGI:1915589]	protein_coding	-0.475646	0.00177166
	Bcl11b	B cell leukemia/lymphoma 11B [Source:MGI Symbol;Acc:MGI:1929913]	protein_coding	-0.493874	0.00200933
	Plekhh1	pleckstrin homology domain containing, family H (with MyTH4 domain) member 1 [Source:MGI Symbol;Acc:MGI:2144989]	protein_coding	-0.555037	0.00282933
	Entpd5	ectonucleoside triphosphate diphosphohydrolase 5 [Source:MGI Symbol;Acc:MGI:1321385]	protein_coding	-0.604669	5.19299e-06
	Ighm	immunoglobulin heavy constant mu [Source:MGI Symbol;Acc:MGI:96448]	IG_C_gene	-0.621716	0.0030778
	Arel1	apoptosis resistant E3 ubiquitin protein ligase 1 [Source:MGI Symbol;Acc:MGI:1915747]	protein_coding	-0.625036	6.37885e-10
	Pld4	phospholipase D family, member 4 [Source:MGI Symbol;Acc:MGI:2144765]	protein_coding	-0.689853	0.00287406
	Odc1	ornithine decarboxylase, structural 1 [Source:MGI Symbol;Acc:MGI:97402]	protein_coding	-0.701061	5.1758e-10
	Gpr68	G protein-coupled receptor 68 [Source:MGI Symbol;Acc:MGI:2441763]	protein_coding	-0.715438	0.000316208
	Cep128	centrosomal protein 128 [Source:MGI Symbol;Acc:MGI:1922466]	protein_coding	-0.730828	0.00382244
	Pxdn	peroxidasin [Source:MGI Symbol;Acc:MGI:1916925]	protein_coding	-0.782575	2.30724e-12
	Vrk1	vaccinia related kinase 1 [Source:MGI Symbol;Acc:MGI:1261847]	protein_coding	-0.834153	0.000111885
	Snapc1	small nuclear RNA activating complex, polypeptide 1 [Source:MGI Symbol;Acc:MGI:1922877]	protein_coding	-0.839973	4.97938e-11
	Cys1	cystin 1 [Source:MGI Symbol;Acc:MGI:2177632]	protein_coding	-0.846669	3.24784e-05
	Gm9866	predicted gene 9866 [Source:MGI Symbol;Acc:MGI:3643118]	lincRNA	-0.851181	2.38695e-08
	Grhl1	grainyhead like transcription factor 1 [Source:MGI Symbol;Acc:MGI:2182540]	protein_coding	-0.916375	2.32366e-06
	Tdp1	tyrosyl-DNA phosphodiesterase 1 [Source:MGI Symbol;Acc:MGI:1920036]	protein_coding	-0.926412	1.19126e-06
	Slc38a6	solute carrier family 38, member 6 [Source:MGI Symbol;Acc:MGI:3648156]	protein_coding	-0.979689	6.48939e-05
	Coch	cochlin [Source:MGI Symbol;Acc:MGI:1278313]	protein_coding	-1.21058	8.44424e-14
	Slc25a47	solute carrier family 25, member 47 [Source:MGI Symbol;Acc:MGI:2144766]	protein_coding	-1.27129	0.000192038
	Ighg2c	immunoglobulin heavy constant gamma 2C [Source:MGI Symbol;Acc:MGI:2686979]	IG_C_gene	-1.28384	0.000554103
	Zfp125	zinc finger protein 125 [Source:MGI Symbol;Acc:MGI:1336211]	transcribed_unprocessed_pseudogene	-1.32419	0.0027444
	Acp1	acid phosphatase 1, soluble [Source:MGI Symbol;Acc:MGI:87881]	protein_coding	-1.35679	1.32106e-34
	2900060N12Rik	RIKEN cDNA 2900060N12 gene [Source:MGI Symbol;Acc:MGI:1920281]	bidirectional_promoter_lncRNA	-1.78319	9.57937e-06
	Srp54a	signal recognition particle 54A [Source:MGI Symbol;Acc:MGI:1346087]	protein_coding	-1.82206	7.3757e-07
	Gm10478	predicted gene 10478 [Source:MGI Symbol;Acc:MGI:3714531]	pseudogene	-2.69272	0.00103593
	Gm40578	predicted gene, 40578 [Source:MGI Symbol;Acc:MGI:5623463]	antisense	-2.72858	9.55068e-10
	Gm19196	predicted gene, 19196 [Source:MGI Symbol;Acc:MGI:5011381]	transcribed_unprocessed_pseudogene	-3.21295	8.87573e-12
	Gm48678	predicted gene, 48678 [Source:MGI Symbol;Acc:MGI:6098299]	antisense	-3.26258	0.00233046
	Gm48508	predicted gene, 48508 [Source:MGI Symbol;Acc:MGI:6098039]	lincRNA	-3.38893	0.00066846
	Colec11	collectin sub-family member 11 [Source:MGI Symbol;Acc:MGI:1918943]	protein_coding	-3.46625	0.00061115
	AC164424.1	novel transcript	lincRNA	-3.48655	0.00133414
	3110053B16Rik	RIKEN cDNA 3110053B16 gene [Source:MGI Symbol;Acc:MGI:1920435]	transcribed_unprocessed_pseudogene	-3.62171	1.4029e-17
	AC163634.1	hippocalcin-like 1 (Hpcal1) pseudogene	transcribed_unprocessed_pseudogene	-5.0031	0.000671991
	AC153140.1	novel transcript	lincRNA	-5.19677	0.00156856
	Gm5784	predicted gene 5784 [Source:MGI Symbol;Acc:MGI:3647969]	lincRNA	-5.76086	2.55039e-05
	2410018L13Rik	RIKEN cDNA 2410018L13 gene [Source:MGI Symbol;Acc:MGI:1916982]	lincRNA	-6.25297	1.71865e-06
	AC124739.2	novel transcript	lincRNA	-6.341	6.65586e-06
	Gm5977	predicted gene 5977 [Source:MGI Symbol;Acc:MGI:3779541]	transcribed_unprocessed_pseudogene	-6.64557	1.20149e-06
13	Rps3a3	ribosomal protein S3A3 [Source:MGI Symbol;Acc:MGI:3643406]	processed_pseudogene	10.9633	6.79552e-39
	Hist1h2al	histone cluster 1, H2al [Source:MGI Symbol;Acc:MGI:3646032]	processed_pseudogene	8.19357	2.64389e-06
	Gm18562	predicted gene, 18562 [Source:MGI Symbol;Acc:MGI:5010747]	unprocessed_pseudogene	7.93419	4.52551e-10
	Gm20075	predicted gene, 20075 [Source:MGI Symbol;Acc:MGI:5012260]	protein_coding	6.99055	6.09386e-41
	Gm8399	predicted gene 8399 [Source:MGI Symbol;Acc:MGI:3647971]	processed_pseudogene	6.57853	2.27999e-191
	Gm11353	predicted gene 11353 [Source:MGI Symbol;Acc:MGI:3649794]	processed_pseudogene	6.56662	8.07733e-60
	Gm7049	predicted gene 7049 [Source:MGI Symbol;Acc:MGI:3646400]	processed_pseudogene	6.00411	1.15384e-07
	Gm3226	predicted gene 3226 [Source:MGI Symbol;Acc:MGI:3804968]	processed_pseudogene	5.96566	2.66378e-59
	Gm11361	predicted pseudogene 11361 [Source:MGI Symbol;Acc:MGI:3649931]	protein_coding	5.5162	1.08985e-71
	Gm16249	predicted gene 16249 [Source:MGI Symbol;Acc:MGI:3826524]	antisense	5.37812	0.00127121
	AK157302	cDNA sequence AK157302 [Source:MGI Symbol;Acc:MGI:3574096]	protein_coding	4.33746	0.00126209
	Gm10029	predicted gene 10029 [Source:MGI Symbol;Acc:MGI:3641706]	processed_pseudogene	4.27608	0.000103702
	Gm33447	predicted gene, 33447 [Source:MGI Symbol;Acc:MGI:5592606]	lincRNA	3.90588	2.1973e-09
	Gm48890	predicted gene, 48890 [Source:MGI Symbol;Acc:MGI:6098652]	TEC	3.67654	0.00235369
	Gzmk	granzyme K [Source:MGI Symbol;Acc:MGI:1298232]	protein_coding	3.28037	1.53637e-06
	Gm8546	predicted gene 8546 [Source:MGI Symbol;Acc:MGI:3647346]	processed_pseudogene	2.9046	0.00045316
	F630042J09Rik	RIKEN cDNA F630042J09 gene [Source:MGI Symbol;Acc:MGI:3642133]	lincRNA	2.70582	2.5857e-11
	Zfp457	zinc finger protein 457 [Source:MGI Symbol;Acc:MGI:2664334]	protein_coding	2.35881	0.00146664
	Gm34672	predicted gene, 34672 [Source:MGI Symbol;Acc:MGI:5593831]	lincRNA	2.22967	0.0014741
	Gm11273	predicted gene 11273 [Source:MGI Symbol;Acc:MGI:3649411]	protein_coding	1.83279	4.14012e-05
	Gm34721	predicted gene, 34721 [Source:MGI Symbol;Acc:MGI:5593880]	lincRNA	1.80118	0.00118465
	Gm10357	predicted gene 10357 [Source:MGI Symbol;Acc:MGI:3641865]	processed_pseudogene	1.5518	0.00142441
	Serpinb6a	serine (or cysteine) peptidase inhibitor, clade B, member 6a [Source:MGI Symbol;Acc:MGI:103123]	protein_coding	1.16863	2.66595e-25
	Sirt5	sirtuin 5 [Source:MGI Symbol;Acc:MGI:1915596]	protein_coding	0.967477	4.62688e-07
	Bphl	biphenyl hydrolase-like (serine hydrolase, breast epithelial mucin-associated antigen) [Source:MGI Symbol;Acc:MGI:1915271]	protein_coding	0.923633	2.33808e-13
	Rfesd	Rieske (Fe-S) domain containing [Source:MGI Symbol;Acc:MGI:2145198]	protein_coding	0.883077	3.28767e-06
	Gpr137b	G protein-coupled receptor 137B [Source:MGI Symbol;Acc:MGI:1891463]	protein_coding	0.82838	7.27602e-07
	Fars2	phenylalanine-tRNA synthetase 2 (mitochondrial) [Source:MGI Symbol;Acc:MGI:1917205]	protein_coding	0.679981	8.40653e-06
	Crhbp	corticotropin releasing hormone binding protein [Source:MGI Symbol;Acc:MGI:88497]	protein_coding	0.639566	6.25629e-06
	Dok3	docking protein 3 [Source:MGI Symbol;Acc:MGI:1351490]	protein_coding	0.623278	8.28116e-05
	Idnk	idnK gluconokinase homolog (E. coli) [Source:MGI Symbol;Acc:MGI:1922981]	protein_coding	0.58405	8.06062e-05
	Lgals8	lectin, galactose binding, soluble 8 [Source:MGI Symbol;Acc:MGI:1928481]	protein_coding	0.547582	8.53615e-05
	Gfm2	G elongation factor, mitochondrial 2 [Source:MGI Symbol;Acc:MGI:2444783]	protein_coding	0.490256	3.25834e-05
	Rab24	RAB24, member RAS oncogene family [Source:MGI Symbol;Acc:MGI:105065]	protein_coding	0.426072	0.00161919
	Dusp22	dual specificity phosphatase 22 [Source:MGI Symbol;Acc:MGI:1915926]	protein_coding	0.366386	0.00257911
	Pdlim7	PDZ and LIM domain 7 [Source:MGI Symbol;Acc:MGI:1914649]	protein_coding	0.360705	0.000926849
	Aldh5a1	aldhehyde dehydrogenase family 5, subfamily A1 [Source:MGI Symbol;Acc:MGI:2441982]	protein_coding	0.339919	0.00286739
	Fam193b	family with sequence similarity 193, member B [Source:MGI Symbol;Acc:MGI:2385851]	protein_coding	0.307087	0.00409354
	Ripor2	RHO family interacting cell polarization regulator 2 [Source:MGI Symbol;Acc:MGI:2444879]	protein_coding	-0.351092	0.00174474
	Spock1	sparc/osteonectin, cwcv and kazal-like domains proteoglycan 1 [Source:MGI Symbol;Acc:MGI:105371]	protein_coding	-0.365774	0.000100232
	Phactr1	phosphatase and actin regulator 1 [Source:MGI Symbol;Acc:MGI:2659021]	protein_coding	-0.369061	0.000598647
	Sema4d	sema domain, immunoglobulin domain (Ig), transmembrane domain (TM) and short cytoplasmic domain, (semaphorin) 4D [Source:MGI Symbol;Acc:MGI:109244]	protein_coding	-0.415089	7.0625e-05
	Nim1k	NIM1 serine/threonine protein kinase [Source:MGI Symbol;Acc:MGI:2442399]	protein_coding	-0.483379	0.000155037
	D130043K22Rik	RIKEN cDNA D130043K22 gene [Source:MGI Symbol;Acc:MGI:3036268]	protein_coding	-0.513046	4.88132e-05
	Nsa2	NSA2 ribosome biogenesis homolog [Source:MGI Symbol;Acc:MGI:1913883]	protein_coding	-0.515679	3.07806e-05
	Gng4	guanine nucleotide binding protein (G protein), gamma 4 [Source:MGI Symbol;Acc:MGI:102703]	protein_coding	-0.539286	0.000287257
	Zfp131	zinc finger protein 131 [Source:MGI Symbol;Acc:MGI:1919715]	protein_coding	-0.544848	9.46179e-05
	Acot13	acyl-CoA thioesterase 13 [Source:MGI Symbol;Acc:MGI:1914084]	protein_coding	-0.562512	2.1748e-06
	Ap3b1	adaptor-related protein complex 3, beta 1 subunit [Source:MGI Symbol;Acc:MGI:1333879]	protein_coding	-0.586481	3.77675e-07
	Fgd3	FYVE, RhoGEF and PH domain containing 3 [Source:MGI Symbol;Acc:MGI:1353657]	protein_coding	-0.615379	0.00412713
	Ero1lb	ERO1-like beta (S. cerevisiae) [Source:MGI Symbol;Acc:MGI:1914725]	protein_coding	-0.665782	1.19881e-05
	Fancc	Fanconi anemia, complementation group C [Source:MGI Symbol;Acc:MGI:95480]	protein_coding	-0.736242	0.00153643
	Mrs2	MRS2 magnesium transporter [Source:MGI Symbol;Acc:MGI:2685748]	protein_coding	-0.74669	3.06024e-11
	Srd5a1	steroid 5 alpha-reductase 1 [Source:MGI Symbol;Acc:MGI:98400]	protein_coding	-0.779298	0.000320864
	Zfp874b	zinc finger protein 874b [Source:MGI Symbol;Acc:MGI:3040702]	protein_coding	-0.901581	7.66149e-06
	Tmem267	transmembrane protein 267 [Source:MGI Symbol;Acc:MGI:3648543]	protein_coding	-0.948173	7.08597e-06
	Akr1e1	aldo-keto reductase family 1, member E1 [Source:MGI Symbol;Acc:MGI:1914758]	protein_coding	-0.94999	2.33459e-10
	Cntnap3	contactin associated protein-like 3 [Source:MGI Symbol;Acc:MGI:3588199]	protein_coding	-0.955195	0.00023035
	Kif27	kinesin family member 27 [Source:MGI Symbol;Acc:MGI:1922300]	protein_coding	-0.978177	0.00272588
	Hist1h1c	histone cluster 1, H1c [Source:MGI Symbol;Acc:MGI:1931526]	protein_coding	-1.06127	2.56992e-09
	Zfp874a	zinc finger protein 874a [Source:MGI Symbol;Acc:MGI:3040703]	protein_coding	-1.0717	3.02071e-09
	Gm10037	predicted gene 10037 [Source:MGI Symbol;Acc:MGI:3645096]	protein_coding	-1.29903	2.14423e-05
	Gmnn	geminin [Source:MGI Symbol;Acc:MGI:1927344]	protein_coding	-1.65611	4.5562e-05
	Rsl1	regulator of sex limited protein 1 [Source:MGI Symbol;Acc:MGI:3044162]	protein_coding	-1.76087	1.72522e-06
	4933433G19Rik	RIKEN cDNA 4933433G19 gene [Source:MGI Symbol;Acc:MGI:1918476]	antisense	-1.96168	0.00187367
	4930525G20Rik	RIKEN cDNA 4930525G20 gene [Source:MGI Symbol;Acc:MGI:2443505]	antisense	-2.03446	0.000713188
	1110046J04Rik	RIKEN cDNA 1110046J04 gene [Source:MGI Symbol;Acc:MGI:1916058]	antisense	-2.14136	9.55672e-08
	Gm46404	predicted gene, 46404 [Source:MGI Symbol;Acc:MGI:5826041]	lincRNA	-2.53325	0.00130179
	AW495222	expressed sequence AW495222 [Source:MGI Symbol;Acc:MGI:2145435]	antisense	-2.56231	1.18928e-05
	Ccl28	chemokine (C-C motif) ligand 28 [Source:MGI Symbol;Acc:MGI:1861731]	protein_coding	-2.88369	1.4838e-06
	Gpr137b-ps	G protein-coupled receptor 137B, pseudogene [Source:MGI Symbol;Acc:MGI:3710533]	transcribed_unprocessed_pseudogene	-3.4443	7.31733e-31
	Gpx6	glutathione peroxidase 6 [Source:MGI Symbol;Acc:MGI:1922762]	protein_coding	-3.98069	0.000903736
	Prss16	protease, serine 16 (thymus) [Source:MGI Symbol;Acc:MGI:1859181]	protein_coding	-4.75752	0.000119286
	Gm3325	predicted gene 3325 [Source:MGI Symbol;Acc:MGI:3781503]	transcribed_processed_pseudogene	-5.01944	0.00411864
	Zfp429	zinc finger protein 429 [Source:MGI Symbol;Acc:MGI:1920057]	protein_coding	-5.76149	4.03401e-07
	9430065F17Rik	RIKEN cDNA 9430065F17 gene [Source:MGI Symbol;Acc:MGI:1924606]	antisense	-5.98107	4.78431e-05
	Zfp738	zinc finger protein 738 [Source:MGI Symbol;Acc:MGI:3040706]	protein_coding	-6.83527	7.71369e-39
14	Gm5801	predicted pseudogene 5801 [Source:MGI Symbol;Acc:MGI:3646055]	processed_pseudogene	8.23418	1.52965e-11
	Tpm3-rs7	tropomyosin 3, related sequence 7 [Source:MGI Symbol;Acc:MGI:99705]	protein_coding	7.01274	1.466e-194
	Rps3a2	ribosomal protein S3A2 [Source:MGI Symbol;Acc:MGI:3642853]	processed_pseudogene	6.35488	1.95746e-56
	Gm47505	predicted gene, 47505 [Source:MGI Symbol;Acc:MGI:6096491]	processed_pseudogene	4.81859	0.00171703
	Gm9800	predicted gene 9800 [Source:MGI Symbol;Acc:MGI:3710580]	processed_pseudogene	4.21531	2.78493e-77
	Gm1821	predicted gene 1821 [Source:MGI Symbol;Acc:MGI:3037679]	transcribed_processed_pseudogene	4.1348	4.5793e-171
	Gm8894	predicted gene 8894 [Source:MGI Symbol;Acc:MGI:3643084]	processed_pseudogene	3.58138	4.0845e-06
	Rnase1	ribonuclease, RNase A family, 1 (pancreatic) [Source:MGI Symbol;Acc:MGI:97919]	protein_coding	2.0542	0.0028955
	Itih3	inter-alpha trypsin inhibitor, heavy chain 3 [Source:MGI Symbol;Acc:MGI:96620]	protein_coding	2.03061	7.10043e-28
	Rpgrip1	retinitis pigmentosa GTPase regulator interacting protein 1 [Source:MGI Symbol;Acc:MGI:1932134]	protein_coding	1.86102	0.000732181
	Klhl33	kelch-like 33 [Source:MGI Symbol;Acc:MGI:3644593]	protein_coding	1.85791	3.30809e-33
	4930480K23Rik	RIKEN cDNA 4930480K23 gene [Source:MGI Symbol;Acc:MGI:1922266]	lincRNA	1.48385	8.89217e-06
	Galnt15	polypeptide N-acetylgalactosaminyltransferase 15 [Source:MGI Symbol;Acc:MGI:1926004]	protein_coding	1.44827	3.5675e-07
	Prkcd	protein kinase C, delta [Source:MGI Symbol;Acc:MGI:97598]	protein_coding	1.40498	0.00368273
	Myh6	myosin, heavy polypeptide 6, cardiac muscle, alpha [Source:MGI Symbol;Acc:MGI:97255]	protein_coding	1.15793	7.41117e-05
	Phf7	PHD finger protein 7 [Source:MGI Symbol;Acc:MGI:1919088]	protein_coding	0.731648	0.00251925
	Pnoc	prepronociceptin [Source:MGI Symbol;Acc:MGI:105308]	protein_coding	0.711403	0.00160579
	Anxa11	annexin A11 [Source:MGI Symbol;Acc:MGI:108481]	protein_coding	0.676505	0.000270943
	Tmtc4	transmembrane and tetratricopeptide repeat containing 4 [Source:MGI Symbol;Acc:MGI:1921050]	protein_coding	0.663144	0.00027525
	Gfra2	glial cell line derived neurotrophic factor family receptor alpha 2 [Source:MGI Symbol;Acc:MGI:1195462]	protein_coding	0.559573	1.05206e-05
	Rgcc	regulator of cell cycle [Source:MGI Symbol;Acc:MGI:1913464]	protein_coding	0.507165	0.000106765
	Khnyn	KH and NYN domain containing [Source:MGI Symbol;Acc:MGI:2451333]	protein_coding	0.499448	0.000490598
	Ebpl	emopamil binding protein-like [Source:MGI Symbol;Acc:MGI:1915427]	protein_coding	0.488437	0.00190069
	Supt16	suppressor of Ty 16 [Source:MGI Symbol;Acc:MGI:1890948]	protein_coding	0.441647	4.54348e-05
	R3hcc1	R3H domain and coiled-coil containing 1 [Source:MGI Symbol;Acc:MGI:1919093]	protein_coding	0.417307	0.000648091
	Glud1	glutamate dehydrogenase 1 [Source:MGI Symbol;Acc:MGI:95753]	protein_coding	0.345353	2.09676e-05
	Ndrg2	N-myc downstream regulated gene 2 [Source:MGI Symbol;Acc:MGI:1352498]	protein_coding	0.321813	0.000242573
	Fdft1	farnesyl diphosphate farnesyl transferase 1 [Source:MGI Symbol;Acc:MGI:102706]	protein_coding	0.319535	0.000525623
	Nedd8	neural precursor cell expressed, developmentally down-regulated gene 8 [Source:MGI Symbol;Acc:MGI:97301]	protein_coding	0.31269	0.00327848
	Fam213a	family with sequence similarity 213, member A [Source:MGI Symbol;Acc:MGI:1917814]	protein_coding	0.307547	0.000850496
	Tox4	TOX high mobility group box family member 4 [Source:MGI Symbol;Acc:MGI:1915389]	protein_coding	-0.289848	0.00342491
	Gmfb	glia maturation factor, beta [Source:MGI Symbol;Acc:MGI:1927133]	protein_coding	-0.317238	0.00277933
	Sugt1	SGT1, suppressor of G2 allele of SKP1 (S. cerevisiae) [Source:MGI Symbol;Acc:MGI:1915205]	protein_coding	-0.351338	0.000253391
	Ppp2r2a	protein phosphatase 2, regulatory subunit B, alpha [Source:MGI Symbol;Acc:MGI:1919228]	protein_coding	-0.354546	0.00111375
	Pnma2	paraneoplastic antigen MA2 [Source:MGI Symbol;Acc:MGI:2444129]	protein_coding	-0.355242	0.000942127
	B930095G15Rik	RIKEN cDNA B930095G15 gene [Source:MGI Symbol;Acc:MGI:2443701]	sense_intronic	-0.362799	0.00394463
	Nudt18	nudix (nucleoside diphosphate linked moiety X)-type motif 18 [Source:MGI Symbol;Acc:MGI:2385853]	protein_coding	-0.384303	0.00185437
	Samd4	sterile alpha motif domain containing 4 [Source:MGI Symbol;Acc:MGI:1921730]	protein_coding	-0.449343	0.00121675
	Ednrb	endothelin receptor type B [Source:MGI Symbol;Acc:MGI:102720]	protein_coding	-0.469224	4.60065e-05
	Rhobtb2	Rho-related BTB domain containing 2 [Source:MGI Symbol;Acc:MGI:2180557]	protein_coding	-0.486675	3.40832e-07
	Stab1	stabilin 1 [Source:MGI Symbol;Acc:MGI:2178742]	protein_coding	-0.541029	0.000782719
	Synpr	synaptoporin [Source:MGI Symbol;Acc:MGI:1919253]	protein_coding	-0.571608	2.74844e-06
	Eef1akmt1	EEF1A alpha lysine methyltransferase 1 [Source:MGI Symbol;Acc:MGI:1915293]	protein_coding	-0.572336	7.32898e-05
	Mettl6	methyltransferase like 6 [Source:MGI Symbol;Acc:MGI:1914261]	protein_coding	-0.704204	6.60144e-06
	Psmb5	proteasome (prosome, macropain) subunit, beta type 5 [Source:MGI Symbol;Acc:MGI:1194513]	protein_coding	-0.707588	2.31701e-09
	Lcp1	lymphocyte cytosolic protein 1 [Source:MGI Symbol;Acc:MGI:104808]	protein_coding	-0.719085	0.00268018
	4930452B06Rik	RIKEN cDNA 4930452B06 gene [Source:MGI Symbol;Acc:MGI:1926154]	protein_coding	-0.767772	3.94431e-05
	Mzt1	mitotic spindle organizing protein 1 [Source:MGI Symbol;Acc:MGI:1924039]	protein_coding	-0.802282	5.5847e-14
	Ncoa4	nuclear receptor coactivator 4 [Source:MGI Symbol;Acc:MGI:1350932]	protein_coding	-0.845336	8.73379e-11
	Wdhd1	WD repeat and HMG-box DNA binding protein 1 [Source:MGI Symbol;Acc:MGI:2443514]	protein_coding	-0.850583	0.000898976
	Tmem260	transmembrane protein 260 [Source:MGI Symbol;Acc:MGI:2443219]	protein_coding	-0.951294	4.26321e-09
	Myh7	myosin, heavy polypeptide 7, cardiac muscle, beta [Source:MGI Symbol;Acc:MGI:2155600]	protein_coding	-1.07356	1.55282e-06
	Pdlim2	PDZ and LIM domain 2 [Source:MGI Symbol;Acc:MGI:2384850]	protein_coding	-1.36404	6.09804e-12
	Slc39a2	solute carrier family 39 (zinc transporter), member 2 [Source:MGI Symbol;Acc:MGI:2684326]	protein_coding	-1.62099	5.15103e-12
	Gm6145	predicted gene 6145 [Source:MGI Symbol;Acc:MGI:3779559]	processed_transcript	-1.65176	9.83611e-14
	Ppp1r3e	protein phosphatase 1, regulatory subunit 3E [Source:MGI Symbol;Acc:MGI:2145790]	protein_coding	-1.77138	5.33261e-11
	AC114585.1	novel transcript	lincRNA	-1.94235	1.3415e-12
	Rec8	REC8 meiotic recombination protein [Source:MGI Symbol;Acc:MGI:1929645]	protein_coding	-2.21293	1.15311e-07
	Cln5	ceroid-lipofuscinosis, neuronal 5 [Source:MGI Symbol;Acc:MGI:2442253]	protein_coding	-2.31562	2.82205e-23
	Gm2974	predicted gene 2974 [Source:MGI Symbol;Acc:MGI:3781152]	protein_coding	-2.88306	0.000646765
	Pnp2	purine-nucleoside phosphorylase 2 [Source:MGI Symbol;Acc:MGI:3712328]	protein_coding	-2.97448	0.00376862
	Gm26782	predicted gene, 26782 [Source:MGI Symbol;Acc:MGI:5477276]	antisense	-3.24732	4.48364e-23
	Cideb	cell death-inducing DNA fragmentation factor, alpha subunit-like effector B [Source:MGI Symbol;Acc:MGI:1270844]	protein_coding	-3.52499	0.00308115
	Gm2237	predicted gene 2237 [Source:MGI Symbol;Acc:MGI:3780407]	protein_coding	-4.4541	1.53068e-05
	Gm3512	predicted gene 3512 [Source:MGI Symbol;Acc:MGI:3781689]	protein_coding	-5.12923	0.00233856
	Gm48600	predicted gene, 48600 [Source:MGI Symbol;Acc:MGI:6098178]	TEC	-5.83109	0.000118773
	Gm16867	predicted gene, 16867 [Source:MGI Symbol;Acc:MGI:4439791]	protein_coding	-6.07292	2.88076e-05
	Gm43305	predicted gene 43305 [Source:MGI Symbol;Acc:MGI:5663442]	processed_transcript	-8.99932	1.86177e-13
15	Gm35019	predicted gene, 35019 [Source:MGI Symbol;Acc:MGI:5594178]	lincRNA	5.90872	0.000116599
	Tcea1-ps1	transcription elongation factor A (SII) 1, pseudogene 1 [Source:MGI Symbol;Acc:MGI:1861432]	processed_pseudogene	5.04013	6.09626e-22
	Lgals2	lectin, galactose-binding, soluble 2 [Source:MGI Symbol;Acc:MGI:895068]	protein_coding	4.71244	0.000305513
	Gm49499	predicted gene, 49499 [Source:MGI Symbol;Acc:MGI:6155183]	TEC	4.67484	0.00279308
	Tmprss6	transmembrane serine protease 6 [Source:MGI Symbol;Acc:MGI:1919003]	protein_coding	3.80862	1.2376e-25
	Gm49410	predicted gene, 49410 [Source:MGI Symbol;Acc:MGI:6155035]	TEC	3.51566	0.00383361
	Gm15387	predicted gene 15387 [Source:MGI Symbol;Acc:MGI:3705374]	processed_pseudogene	3.23545	4.5946e-07
	Il7r	interleukin 7 receptor [Source:MGI Symbol;Acc:MGI:96562]	protein_coding	1.88392	0.0025977
	Capsl	calcyphosine-like [Source:MGI Symbol;Acc:MGI:1922818]	protein_coding	1.46148	7.60577e-05
	Gm41361	predicted gene, 41361 [Source:MGI Symbol;Acc:MGI:5624246]	antisense	1.34041	0.00184285
	Tuba1c	tubulin, alpha 1C [Source:MGI Symbol;Acc:MGI:1095409]	protein_coding	1.24898	7.81598e-05
	Gm49492	predicted gene, 49492 [Source:MGI Symbol;Acc:MGI:6155169]	bidirectional_promoter_lncRNA	1.13721	1.30638e-08
	Apol8	apolipoprotein L 8 [Source:MGI Symbol;Acc:MGI:2444921]	protein_coding	0.929919	7.35239e-05
	Sh3bp1	SH3-domain binding protein 1 [Source:MGI Symbol;Acc:MGI:104603]	protein_coding	0.774485	0.00201048
	Tonsl	tonsoku-like, DNA repair protein [Source:MGI Symbol;Acc:MGI:1919999]	protein_coding	0.699319	0.00133701
	Adamts20	a disintegrin-like and metallopeptidase (reprolysin type) with thrombospondin type 1 motif, 20 [Source:MGI Symbol;Acc:MGI:2660628]	protein_coding	0.673838	0.000241962
	Efcab6	EF-hand calcium binding domain 6 [Source:MGI Symbol;Acc:MGI:1924877]	protein_coding	0.641438	0.000602057
	Rida	reactive intermediate imine deaminase A homolog [Source:MGI Symbol;Acc:MGI:1095401]	protein_coding	0.615644	3.41163e-07
	Cyp2d22	cytochrome P450, family 2, subfamily d, polypeptide 22 [Source:MGI Symbol;Acc:MGI:1929474]	protein_coding	0.614999	2.60764e-07
	Fam118a	family with sequence similarity 118, member A [Source:MGI Symbol;Acc:MGI:1920475]	protein_coding	0.569184	4.41339e-05
	Top1mt	DNA topoisomerase 1, mitochondrial [Source:MGI Symbol;Acc:MGI:1920210]	protein_coding	0.519477	0.00177925
	Tab1	TGF-beta activated kinase 1/MAP3K7 binding protein 1 [Source:MGI Symbol;Acc:MGI:1913763]	protein_coding	0.479086	0.000175327
	Pvalb	parvalbumin [Source:MGI Symbol;Acc:MGI:97821]	protein_coding	0.441999	0.000415214
	Snu13	SNU13 homolog, small nuclear ribonucleoprotein (U4/U6.U5) [Source:MGI Symbol;Acc:MGI:893586]	protein_coding	0.42868	3.91379e-06
	Pla2g6	phospholipase A2, group VI [Source:MGI Symbol;Acc:MGI:1859152]	protein_coding	0.40758	0.00213777
	Csdc2	cold shock domain containing C2, RNA binding [Source:MGI Symbol;Acc:MGI:2146027]	protein_coding	0.399969	0.000156625
	Copz1	coatomer protein complex, subunit zeta 1 [Source:MGI Symbol;Acc:MGI:1929063]	protein_coding	0.367594	0.000400685
	Cerk	ceramide kinase [Source:MGI Symbol;Acc:MGI:2386052]	protein_coding	0.356347	0.000681834
	Poldip3	polymerase (DNA-directed), delta interacting protein 3 [Source:MGI Symbol;Acc:MGI:1921076]	protein_coding	0.34318	0.000281699
	Sqle	squalene epoxidase [Source:MGI Symbol;Acc:MGI:109296]	protein_coding	0.33187	0.000645153
	Faim2	Fas apoptotic inhibitory molecule 2 [Source:MGI Symbol;Acc:MGI:1919643]	protein_coding	0.323348	0.000675949
	Myh9	myosin, heavy polypeptide 9, non-muscle [Source:MGI Symbol;Acc:MGI:107717]	protein_coding	-0.312724	0.00115182
	Ago2	argonaute RISC catalytic subunit 2 [Source:MGI Symbol;Acc:MGI:2446632]	protein_coding	-0.328435	0.00118677
	Arf3	ADP-ribosylation factor 3 [Source:MGI Symbol;Acc:MGI:99432]	protein_coding	-0.339567	1.65649e-05
	Cox6c	cytochrome c oxidase subunit 6C [Source:MGI Symbol;Acc:MGI:104614]	protein_coding	-0.340057	0.00148084
	Ncald	neurocalcin delta [Source:MGI Symbol;Acc:MGI:1196326]	protein_coding	-0.381027	0.000267141
	Otulinl	OTU deubiquitinase with linear linkage specificity like [Source:MGI Symbol;Acc:MGI:2687281]	protein_coding	-0.409579	0.0033456
	Pdgfb	platelet derived growth factor, B polypeptide [Source:MGI Symbol;Acc:MGI:97528]	protein_coding	-0.4187	0.00125472
	Abcd2	ATP-binding cassette, sub-family D (ALD), member 2 [Source:MGI Symbol;Acc:MGI:1349467]	protein_coding	-0.450215	0.00143619
	Lrrk2	leucine-rich repeat kinase 2 [Source:MGI Symbol;Acc:MGI:1913975]	protein_coding	-0.514477	0.00131549
	Sox10	SRY (sex determining region Y)-box 10 [Source:MGI Symbol;Acc:MGI:98358]	protein_coding	-0.560314	8.51145e-05
	Sstr3	somatostatin receptor 3 [Source:MGI Symbol;Acc:MGI:98329]	protein_coding	-0.563555	0.000206605
	Trib1	tribbles pseudokinase 1 [Source:MGI Symbol;Acc:MGI:2443397]	protein_coding	-0.580831	0.00016085
	Kcnq3	potassium voltage-gated channel, subfamily Q, member 3 [Source:MGI Symbol;Acc:MGI:1336181]	protein_coding	-0.58364	1.69245e-06
	Sla	src-like adaptor [Source:MGI Symbol;Acc:MGI:104295]	protein_coding	-0.605709	0.00231192
	Cyth4	cytohesin 4 [Source:MGI Symbol;Acc:MGI:2441702]	protein_coding	-0.613026	0.000171073
	Rad1	RAD1 checkpoint DNA exonuclease [Source:MGI Symbol;Acc:MGI:1316678]	protein_coding	-0.622928	0.001894
	Pop1	processing of precursor 1, ribonuclease P/MRP family, (S. cerevisiae) [Source:MGI Symbol;Acc:MGI:1914974]	protein_coding	-0.627396	0.00237483
	Wdr70	WD repeat domain 70 [Source:MGI Symbol;Acc:MGI:1921020]	protein_coding	-0.631459	1.99968e-05
	Galnt6	polypeptide N-acetylgalactosaminyltransferase 6 [Source:MGI Symbol;Acc:MGI:1891640]	protein_coding	-0.653324	0.00235579
	Dab2	disabled 2, mitogen-responsive phosphoprotein [Source:MGI Symbol;Acc:MGI:109175]	protein_coding	-0.66204	0.00124712
	Klf10	Kruppel-like factor 10 [Source:MGI Symbol;Acc:MGI:1101353]	protein_coding	-0.684116	5.90124e-05
	Naprt	nicotinate phosphoribosyltransferase [Source:MGI Symbol;Acc:MGI:2442664]	protein_coding	-0.73449	0.00316517
	Slc11a2	solute carrier family 11 (proton-coupled divalent metal ion transporters), member 2 [Source:MGI Symbol;Acc:MGI:1345279]	protein_coding	-0.74065	1.77454e-10
	Atad2	ATPase family, AAA domain containing 2 [Source:MGI Symbol;Acc:MGI:1917722]	protein_coding	-0.777124	0.00252448
	Rpl3	ribosomal protein L3 [Source:MGI Symbol;Acc:MGI:1351605]	protein_coding	-0.812221	9.44351e-15
	Gm2824	predicted gene 2824 [Source:MGI Symbol;Acc:MGI:3780995]	lincRNA	-0.815259	0.00228156
	Utp23	UTP23 small subunit processome component [Source:MGI Symbol;Acc:MGI:1925831]	protein_coding	-1.3295	5.83436e-09
	Endou	endonuclease, polyU-specific [Source:MGI Symbol;Acc:MGI:97746]	protein_coding	-1.34932	0.00088986
	Mafa	v-maf musculoaponeurotic fibrosarcoma oncogene family, protein A (avian) [Source:MGI Symbol;Acc:MGI:2673307]	protein_coding	-1.39123	0.0019903
	Cthrc1	collagen triple helix repeat containing 1 [Source:MGI Symbol;Acc:MGI:1915838]	protein_coding	-1.89105	6.82302e-11
	Olfr287	olfactory receptor 287 [Source:MGI Symbol;Acc:MGI:3030121]	protein_coding	-2.62936	2.65958e-09
	Gm15382	predicted gene 15382 [Source:MGI Symbol;Acc:MGI:3705661]	processed_pseudogene	-5.03493	0.003304
	Gm10856	predicted gene 10856 [Source:MGI Symbol;Acc:MGI:3641730]	lincRNA	-5.08864	0.00249306
	Ly6c1	lymphocyte antigen 6 complex, locus C1 [Source:MGI Symbol;Acc:MGI:96882]	protein_coding	-10.7395	2.10833e-19
16	Gm4737	predicted gene 4737 [Source:MGI Symbol;Acc:MGI:3643647]	protein_coding	7.97103	2.84272e-20
	Kcnj15	potassium inwardly-rectifying channel, subfamily J, member 15 [Source:MGI Symbol;Acc:MGI:1310000]	protein_coding	6.91968	5.69497e-07
	AC132099.1	myosin, light chain 12B, regulatory (Myl12b) pseudogene	processed_pseudogene	6.71668	1.35577e-06
	AC087802.4	biorientation of chromosomes in cell division 1 (Bos1) pseudogene	processed_pseudogene	6.25156	1.73449e-05
	AC174448.1	novel transcript, antisense to Rcan1	antisense	5.49945	2.67886e-06
	CT010524.1	NOP56 ribonucleoprotein (Nop56) pseudogene	processed_pseudogene	5.42009	0.00102003
	Gm9816	predicted pseudogene 9816 [Source:MGI Symbol;Acc:MGI:3704465]	processed_pseudogene	4.16941	9.28276e-41
	Gm10241	predicted pseudogene 10241 [Source:MGI Symbol;Acc:MGI:3704461]	processed_pseudogene	2.71759	0.000149969
	Lca5l	Leber congenital amaurosis 5-like [Source:MGI Symbol;Acc:MGI:3041157]	protein_coding	0.977744	0.00361115
	Cox17	cytochrome c oxidase assembly protein 17, copper chaperone [Source:MGI Symbol;Acc:MGI:1333806]	protein_coding	0.891315	3.23677e-05
	Ccdc80	coiled-coil domain containing 80 [Source:MGI Symbol;Acc:MGI:1915146]	protein_coding	0.840667	2.17081e-06
	Atp13a4	ATPase type 13A4 [Source:MGI Symbol;Acc:MGI:1924456]	protein_coding	0.796336	3.58437e-05
	1300002E11Rik	RIKEN cDNA 1300002E11 gene [Source:MGI Symbol;Acc:MGI:1919001]	lincRNA	0.755412	0.000856136
	Slc15a2	solute carrier family 15 (H+/peptide transporter), member 2 [Source:MGI Symbol;Acc:MGI:1890457]	protein_coding	0.73311	2.56662e-08
	Mettl22	methyltransferase like 22 [Source:MGI Symbol;Acc:MGI:2384301]	protein_coding	0.601507	4.06901e-05
	Aifm3	apoptosis-inducing factor, mitochondrion-associated 3 [Source:MGI Symbol;Acc:MGI:1919418]	protein_coding	0.553869	9.19836e-09
	Clec16a	C-type lectin domain family 16, member A [Source:MGI Symbol;Acc:MGI:1921624]	protein_coding	0.467489	1.83099e-06
	Eif2b5	eukaryotic translation initiation factor 2B, subunit 5 epsilon [Source:MGI Symbol;Acc:MGI:2446176]	protein_coding	0.444541	1.09233e-05
	Vwa5b2	von Willebrand factor A domain containing 5B2 [Source:MGI Symbol;Acc:MGI:2681859]	protein_coding	0.442012	5.91186e-05
	Fstl1	follistatin-like 1 [Source:MGI Symbol;Acc:MGI:102793]	protein_coding	0.358862	0.0015306
	Mb21d2	Mab-21 domain containing 2 [Source:MGI Symbol;Acc:MGI:1917028]	protein_coding	0.329502	0.00245325
	Wrb	tryptophan rich basic protein [Source:MGI Symbol;Acc:MGI:2136882]	protein_coding	0.308652	0.00325847
	Mkl2	MKL/myocardin-like 2 [Source:MGI Symbol;Acc:MGI:3050795]	protein_coding	-0.276092	0.00211851
	Olig1	oligodendrocyte transcription factor 1 [Source:MGI Symbol;Acc:MGI:1355334]	protein_coding	-0.319674	0.0020267
	2510009E07Rik	RIKEN cDNA 2510009E07 gene [Source:MGI Symbol;Acc:MGI:1919440]	protein_coding	-0.419879	0.000119152
	Carhsp1	calcium regulated heat stable protein 1 [Source:MGI Symbol;Acc:MGI:1196368]	protein_coding	-0.465515	0.000397369
	Fam43a	family with sequence similarity 43, member A [Source:MGI Symbol;Acc:MGI:2676309]	protein_coding	-0.465625	0.0015064
	Cpox	coproporphyrinogen oxidase [Source:MGI Symbol;Acc:MGI:104841]	protein_coding	-0.499576	1.64726e-05
	Apod	apolipoprotein D [Source:MGI Symbol;Acc:MGI:88056]	protein_coding	-0.541474	3.96782e-08
	Pdxdc1	pyridoxal-dependent decarboxylase domain containing 1 [Source:MGI Symbol;Acc:MGI:1920909]	protein_coding	-0.591696	2.36464e-07
	Tmem44	transmembrane protein 44 [Source:MGI Symbol;Acc:MGI:1924489]	protein_coding	-0.626613	4.02935e-10
	Sec14l5	SEC14-like lipid binding 5 [Source:MGI Symbol;Acc:MGI:3616084]	protein_coding	-0.723098	0.0001883
	Tbccd1	TBCC domain containing 1 [Source:MGI Symbol;Acc:MGI:1917823]	protein_coding	-0.805038	8.18616e-06
	Emp2	epithelial membrane protein 2 [Source:MGI Symbol;Acc:MGI:1098726]	protein_coding	-0.943231	3.51225e-12
	Parp14	poly (ADP-ribose) polymerase family, member 14 [Source:MGI Symbol;Acc:MGI:1919489]	protein_coding	-1.15671	0.00348937
	Rpl35a	ribosomal protein L35A [Source:MGI Symbol;Acc:MGI:1928894]	protein_coding	-1.94473	1.20803e-49
	Tmem114	transmembrane protein 114 [Source:MGI Symbol;Acc:MGI:1921970]	protein_coding	-1.95134	0.000304129
	AC161376.2	novel transcript	lincRNA	-2.05226	0.00399897
	AC171205.1	TEC	TEC	-3.22503	6.99437e-06
	AC131339.2	novel transcript	processed_transcript	-3.79663	0.000775273
	AC165079.1	ribosomal protein L15 (Rpl15), pseudogene	processed_pseudogene	-4.27601	0.000129854
	AC091463.1	novel transcript	lincRNA	-4.80353	0.00155873
17	AC154187.2	novel protein	protein_coding	6.34926	1.66939e-26
	H2-Ea-ps	histocompatibility 2, class II antigen E alpha, pseudogene [Source:MGI Symbol;Acc:MGI:95900]	unprocessed_pseudogene	6.32295	1.14709e-05
	AC183097.3	fibrillarin (Fbl) pseudogene	processed_pseudogene	6.19863	5.12618e-05
	Gm10093	predicted pseudogene 10093 [Source:MGI Symbol;Acc:MGI:3704479]	processed_pseudogene	5.90323	2.80412e-16
	AC154457.3	mitochondrial ribosomal protein S10 (Mrps10) pseudogene	processed_pseudogene	5.44598	0.000132967
	Gm20443	predicted gene 20443 [Source:MGI Symbol;Acc:MGI:5141908]	lincRNA	5.43481	0.000889642
	Lta	lymphotoxin A [Source:MGI Symbol;Acc:MGI:104797]	protein_coding	5.29976	1.18564e-05
	Stk19-ps1	serine/threonine kinase 19, pseudogene 1 [Source:MGI Symbol;Acc:MGI:2148500]	unprocessed_pseudogene	4.75908	0.000792486
	Npw	neuropeptide W [Source:MGI Symbol;Acc:MGI:2685781]	protein_coding	4.63424	0.000234681
	Prss41	protease, serine 41 [Source:MGI Symbol;Acc:MGI:1918253]	protein_coding	4.41172	3.99258e-13
	AC183095.1	predicted 2808 [Source:NCBI gene;Acc:100040500]	unprocessed_pseudogene	4.10294	3.1416e-08
	Gm7335	predicted gene 7335 [Source:MGI Symbol;Acc:MGI:3644473]	processed_pseudogene	4.09858	0.000328111
	Gm10499	predicted gene 10499 [Source:MGI Symbol;Acc:MGI:3702919]	transcribed_unprocessed_pseudogene	4.07947	0.00343543
	Rnf151	ring finger protein 151 [Source:MGI Symbol;Acc:MGI:1914754]	protein_coding	3.95049	1.17674e-06
	Tagap	T cell activation Rho GTPase activating protein [Source:MGI Symbol;Acc:MGI:3615484]	protein_coding	3.7352	5.69035e-24
	Fpr2	formyl peptide receptor 2 [Source:MGI Symbol;Acc:MGI:1278319]	protein_coding	3.22649	0.000157372
	C3	complement component 3 [Source:MGI Symbol;Acc:MGI:88227]	protein_coding	3.17041	1.86508e-10
	Sstr5	somatostatin receptor 5 [Source:MGI Symbol;Acc:MGI:894282]	protein_coding	2.54776	6.81292e-06
	Tekt4	tektin 4 [Source:MGI Symbol;Acc:MGI:1919090]	protein_coding	2.28887	4.05247e-05
	C4a	complement component 4A (Rodgers blood group) [Source:MGI Symbol;Acc:MGI:98320]	processed_transcript	1.94271	5.80926e-14
	Fndc1	fibronectin type III domain containing 1 [Source:MGI Symbol;Acc:MGI:1915905]	protein_coding	1.91894	5.33336e-15
	CT010496.1	novel transcript	bidirectional_promoter_lncRNA	1.52369	1.55191e-07
	9030025P20Rik	RIKEN cDNA 9030025P20 gene [Source:MGI Symbol;Acc:MGI:3583895]	protein_coding	1.38809	1.02981e-05
	Angptl4	angiopoietin-like 4 [Source:MGI Symbol;Acc:MGI:1888999]	protein_coding	1.36828	0.000264132
	Lrg1	leucine-rich alpha-2-glycoprotein 1 [Source:MGI Symbol;Acc:MGI:1924155]	protein_coding	1.13705	0.00284035
	Dynlt1f	dynein light chain Tctex-type 1F [Source:MGI Symbol;Acc:MGI:3780996]	protein_coding	1.07439	0.00365791
	Plin4	perilipin 4 [Source:MGI Symbol;Acc:MGI:1929709]	protein_coding	1.07401	0.000777939
	Gm20219	predicted gene, 20219 [Source:MGI Symbol;Acc:MGI:5012404]	protein_coding	0.958005	0.00282787
	4732491K20Rik	RIKEN cDNA 4732491K20 gene [Source:MGI Symbol;Acc:MGI:3026975]	bidirectional_promoter_lncRNA	0.916843	0.00286829
	Flywch2	FLYWCH family member 2 [Source:MGI Symbol;Acc:MGI:1924167]	protein_coding	0.80255	2.06855e-05
	Rsph1	radial spoke head 1 homolog (Chlamydomonas) [Source:MGI Symbol;Acc:MGI:1194909]	protein_coding	0.763592	0.00243766
	Slc29a1	solute carrier family 29 (nucleoside transporters), member 1 [Source:MGI Symbol;Acc:MGI:1927073]	protein_coding	0.686613	6.91795e-05
	Zfp414	zinc finger protein 414 [Source:MGI Symbol;Acc:MGI:1915641]	protein_coding	0.683373	1.84314e-05
	Adcyap1	adenylate cyclase activating polypeptide 1 [Source:MGI Symbol;Acc:MGI:105094]	protein_coding	0.658661	7.05538e-05
	Cd320	CD320 antigen [Source:MGI Symbol;Acc:MGI:1860083]	protein_coding	0.650376	1.94705e-05
	Dxo	decapping exoribonuclease [Source:MGI Symbol;Acc:MGI:1890444]	protein_coding	0.589624	0.000121268
	Pex6	peroxisomal biogenesis factor 6 [Source:MGI Symbol;Acc:MGI:2385054]	protein_coding	0.524957	1.75634e-05
	CT010467.1	18s RNA, related sequence 5	rRNA	0.520629	0.000180153
	Haghl	hydroxyacylglutathione hydrolase-like [Source:MGI Symbol;Acc:MGI:1919877]	protein_coding	0.49569	4.32686e-05
	Ppt2	palmitoyl-protein thioesterase 2 [Source:MGI Symbol;Acc:MGI:1860075]	protein_coding	0.446863	0.00218277
	Mut	methylmalonyl-Coenzyme A mutase [Source:MGI Symbol;Acc:MGI:97239]	protein_coding	0.41572	0.000618013
	Cbs	cystathionine beta-synthase [Source:MGI Symbol;Acc:MGI:88285]	protein_coding	0.390685	0.00134213
	Dus3l	dihydrouridine synthase 3-like (S. cerevisiae) [Source:MGI Symbol;Acc:MGI:2147092]	protein_coding	0.378613	0.000324395
	Phf1	PHD finger protein 1 [Source:MGI Symbol;Acc:MGI:98647]	protein_coding	0.368115	0.00135
	Mrps10	mitochondrial ribosomal protein S10 [Source:MGI Symbol;Acc:MGI:1928139]	protein_coding	0.367924	0.00374587
	Akap8l	A kinase (PRKA) anchor protein 8-like [Source:MGI Symbol;Acc:MGI:1860606]	protein_coding	0.327919	0.00110486
	Tubb4a	tubulin, beta 4A class IVA [Source:MGI Symbol;Acc:MGI:107848]	protein_coding	-0.255461	0.00329438
	Calm2	calmodulin 2 [Source:MGI Symbol;Acc:MGI:103250]	protein_coding	-0.266778	0.000692845
	Cox7a2l	cytochrome c oxidase subunit 7A2 like [Source:MGI Symbol;Acc:MGI:106015]	protein_coding	-0.313059	0.00215219
	Flot1	flotillin 1 [Source:MGI Symbol;Acc:MGI:1100500]	protein_coding	-0.328467	0.000528305
	Atp6v1g2	ATPase, H+ transporting, lysosomal V1 subunit G2 [Source:MGI Symbol;Acc:MGI:1913487]	protein_coding	-0.37199	4.45403e-05
	Prkce	protein kinase C, epsilon [Source:MGI Symbol;Acc:MGI:97599]	protein_coding	-0.385704	7.00971e-05
	Kat2b	K(lysine) acetyltransferase 2B [Source:MGI Symbol;Acc:MGI:1343094]	protein_coding	-0.431094	0.00393416
	Ndufaf7	NADH:ubiquinone oxidoreductase complex assembly factor 7 [Source:MGI Symbol;Acc:MGI:1920944]	protein_coding	-0.477366	8.19782e-05
	Rpl7l1	ribosomal protein L7-like 1 [Source:MGI Symbol;Acc:MGI:1913479]	protein_coding	-0.485678	0.000633681
	Tbc1d24	TBC1 domain family, member 24 [Source:MGI Symbol;Acc:MGI:2443456]	protein_coding	-0.52017	5.12521e-07
	Nudt3	nudix (nucleotide diphosphate linked moiety X)-type motif 3 [Source:MGI Symbol;Acc:MGI:1928484]	protein_coding	-0.541758	1.13039e-08
	Fam173a	family with sequence similarity 173, member A [Source:MGI Symbol;Acc:MGI:2384888]	protein_coding	-0.555601	1.63512e-05
	Prkd3	protein kinase D3 [Source:MGI Symbol;Acc:MGI:1922542]	protein_coding	-0.585329	0.00409584
	Rsph3b	radial spoke 3B homolog (Chlamydomonas) [Source:MGI Symbol;Acc:MGI:3630308]	protein_coding	-0.666665	0.0020498
	Trem2	triggering receptor expressed on myeloid cells 2 [Source:MGI Symbol;Acc:MGI:1913150]	protein_coding	-0.675662	6.00247e-05
	H2-T23	histocompatibility 2, T region locus 23 [Source:MGI Symbol;Acc:MGI:95957]	protein_coding	-0.681791	8.15411e-05
	Zfp871	zinc finger protein 871 [Source:MGI Symbol;Acc:MGI:1921793]	protein_coding	-0.753056	0.00044477
	Rsph3a	radial spoke 3A homolog (Chlamydomonas) [Source:MGI Symbol;Acc:MGI:1914082]	protein_coding	-0.758372	0.000912257
	Zfp943	zinc finger prtoein 943 [Source:MGI Symbol;Acc:MGI:1921920]	protein_coding	-0.771486	0.000292463
	Myl12b	myosin, light chain 12B, regulatory [Source:MGI Symbol;Acc:MGI:107494]	protein_coding	-0.817273	0.00072999
	Trmt61b	tRNA methyltransferase 61B [Source:MGI Symbol;Acc:MGI:1916039]	antisense	-0.831597	0.00216226
	Mog	myelin oligodendrocyte glycoprotein [Source:MGI Symbol;Acc:MGI:97435]	protein_coding	-0.855472	4.12409e-07
	Dnase1l2	deoxyribonuclease 1-like 2 [Source:MGI Symbol;Acc:MGI:1913955]	protein_coding	-0.856448	0.0031504
	H2-T22	histocompatibility 2, T region locus 22 [Source:MGI Symbol;Acc:MGI:95956]	protein_coding	-0.895569	1.0432e-07
	Prr18	proline rich 18 [Source:MGI Symbol;Acc:MGI:2443403]	protein_coding	-0.898803	6.74337e-09
	Trip10	thyroid hormone receptor interactor 10 [Source:MGI Symbol;Acc:MGI:2146901]	protein_coding	-0.91642	0.000114054
	Pot1b	protection of telomeres 1B [Source:MGI Symbol;Acc:MGI:1920086]	protein_coding	-0.920969	0.00159261
	Adgre1	adhesion G protein-coupled receptor E1 [Source:MGI Symbol;Acc:MGI:106912]	protein_coding	-0.973811	0.00050594
	Tulp4	tubby like protein 4 [Source:MGI Symbol;Acc:MGI:1916092]	protein_coding	-1.09366	1.60385e-22
	Hmga1	high mobility group AT-hook 1 [Source:MGI Symbol;Acc:MGI:96160]	protein_coding	-1.09454	8.06932e-15
	C4b	complement component 4B (Chido blood group) [Source:MGI Symbol;Acc:MGI:88228]	protein_coding	-1.16047	4.77828e-12
	Rnps1	ribonucleic acid binding protein S1 [Source:MGI Symbol;Acc:MGI:97960]	protein_coding	-1.23636	2.96927e-38
	Metrn	meteorin, glial cell differentiation regulator [Source:MGI Symbol;Acc:MGI:1917333]	protein_coding	-1.31015	1.5986e-05
	Cyp4f14	cytochrome P450, family 4, subfamily f, polypeptide 14 [Source:MGI Symbol;Acc:MGI:1927669]	protein_coding	-1.32792	9.41107e-08
	Gm26694	predicted gene, 26694 [Source:MGI Symbol;Acc:MGI:5477188]	lincRNA	-1.32811	0.00323489
	H2-K1	histocompatibility 2, K1, K region [Source:MGI Symbol;Acc:MGI:95904]	protein_coding	-1.40194	2.12524e-19
	H2-Aa	histocompatibility 2, class II antigen A, alpha [Source:MGI Symbol;Acc:MGI:95895]	protein_coding	-1.44343	0.0020463
	Rps18	ribosomal protein S18 [Source:MGI Symbol;Acc:MGI:98146]	protein_coding	-1.45968	3.46705e-50
	A230051N06Rik	RIKEN cDNA A230051N06 gene [Source:NCBI gene;Acc:320593]	lincRNA	-1.47807	0.00180638
	Tagap1	T cell activation GTPase activating protein 1 [Source:MGI Symbol;Acc:MGI:1919786]	protein_coding	-1.64123	2.40153e-24
	Rps2	ribosomal protein S2 [Source:MGI Symbol;Acc:MGI:105110]	protein_coding	-1.65427	5.3442e-44
	Cyp39a1	cytochrome P450, family 39, subfamily a, polypeptide 1 [Source:MGI Symbol;Acc:MGI:1927096]	protein_coding	-1.72149	5.51818e-05
	H2-Ab1	histocompatibility 2, class II antigen A, beta 1 [Source:MGI Symbol;Acc:MGI:103070]	protein_coding	-1.7545	0.000172578
	Tmem181a	transmembrane protein 181A [Source:MGI Symbol;Acc:MGI:1924356]	protein_coding	-2.11399	1.01621e-51
	Dynlt1a	dynein light chain Tctex-type 1A [Source:MGI Symbol;Acc:MGI:3807506]	protein_coding	-2.12404	3.42504e-10
	H2-Q4	histocompatibility 2, Q region locus 4 [Source:MGI Symbol;Acc:MGI:95933]	protein_coding	-2.15868	1.36634e-06
	CT025671.1	novel transcript	lincRNA	-2.33641	0.000321687
	Tmem181b-ps	transmembrane protein 181B, pseudogene [Source:MGI Symbol;Acc:MGI:3779544]	transcribed_unprocessed_pseudogene	-2.47475	1.1854e-46
	CT025671.2	periphilin 1 (Pphln1) pseudogene	processed_pseudogene	-2.75033	0.000621985
	H2-Eb1	histocompatibility 2, class II antigen E beta [Source:MGI Symbol;Acc:MGI:95901]	protein_coding	-3.13163	5.50127e-09
	Atp6v0c	ATPase, H+ transporting, lysosomal V0 subunit C [Source:MGI Symbol;Acc:MGI:88116]	protein_coding	-3.23327	2.3095e-190
	Ltb	lymphotoxin B [Source:MGI Symbol;Acc:MGI:104796]	protein_coding	-3.29456	0.00334121
	H2-Q2	histocompatibility 2, Q region locus 2 [Source:MGI Symbol;Acc:MGI:95931]	protein_coding	-3.37498	0.000471817
	H2-Q1	histocompatibility 2, Q region locus 1 [Source:MGI Symbol;Acc:MGI:95928]	protein_coding	-3.80251	7.87113e-09
	H2-D1	histocompatibility 2, D region locus 1 [Source:MGI Symbol;Acc:MGI:95896]	protein_coding	-3.87818	2.57277e-83
	CT486005.1	novel transcript	lincRNA	-4.25594	1.64127e-09
	H2-Q6	histocompatibility 2, Q region locus 6 [Source:MGI Symbol;Acc:MGI:95935]	protein_coding	-4.37124	0.000913204
	A930015D03Rik	RIKEN cDNA A930015D03 gene [Source:MGI Symbol;Acc:MGI:1925060]	antisense	-5.10012	0.00298934
	AC151284.2	microtubule-associated protein 7 (Map7) pseudogene	processed_pseudogene	-5.40587	1.10241e-08
	Guca1b	guanylate cyclase activator 1B [Source:MGI Symbol;Acc:MGI:1194489]	protein_coding	-5.84433	8.93807e-05
	H2-K2	histocompatibility 2, K region locus 2 [Source:MGI Symbol;Acc:MGI:95906]	unprocessed_pseudogene	-6.02536	6.46102e-06
	Cyp4f16	cytochrome P450, family 4, subfamily f, polypeptide 16 [Source:MGI Symbol;Acc:MGI:1917351]	protein_coding	-6.43855	7.29743e-13
18	Gm3650	predicted gene 3650 [Source:MGI Symbol;Acc:MGI:3781826]	unprocessed_pseudogene	7.85235	1.20214e-13
	Eno1b	enolase 1B, retrotransposed [Source:MGI Symbol;Acc:MGI:3648653]	protein_coding	7.84702	1.6901e-61
	Gm7729	predicted gene 7729 [Source:MGI Symbol;Acc:MGI:3647361]	unprocessed_pseudogene	4.76745	5.25416e-09
	Eif3j2	eukaryotic translation initiation factor 3, subunit J2 [Source:MGI Symbol;Acc:MGI:3704486]	protein_coding	4.76113	2.05667e-60
	1500015A07Rik	RIKEN cDNA 1500015A07 gene [Source:MGI Symbol;Acc:MGI:1916232]	antisense	3.08073	3.18326e-86
	Pcdha8	protocadherin alpha 8 [Source:MGI Symbol;Acc:MGI:2681879]	protein_coding	2.97734	2.95402e-10
	Pcdhgb8	protocadherin gamma subfamily B, 8 [Source:MGI Symbol;Acc:MGI:1935200]	polymorphic_pseudogene	2.442	2.61031e-15
	Bambi	BMP and activin membrane-bound inhibitor [Source:MGI Symbol;Acc:MGI:1915260]	protein_coding	0.800035	0.00379771
	Atp9b	ATPase, class II, type 9B [Source:MGI Symbol;Acc:MGI:1354757]	protein_coding	0.308217	0.0022773
	Arhgap26	Rho GTPase activating protein 26 [Source:MGI Symbol;Acc:MGI:1918552]	protein_coding	0.303027	0.00198488
	Galnt1	polypeptide N-acetylgalactosaminyltransferase 1 [Source:MGI Symbol;Acc:MGI:894693]	protein_coding	-0.340532	0.00176446
	Cdh2	cadherin 2 [Source:MGI Symbol;Acc:MGI:88355]	protein_coding	-0.344166	0.00231465
	Fgf1	fibroblast growth factor 1 [Source:MGI Symbol;Acc:MGI:95515]	protein_coding	-0.374345	0.0022713
	Apc	adenomatosis polyposis coli [Source:MGI Symbol;Acc:MGI:88039]	protein_coding	-0.383226	0.00295313
	Csf1r	colony stimulating factor 1 receptor [Source:MGI Symbol;Acc:MGI:1339758]	protein_coding	-0.389022	4.22822e-05
	Hdhd2	haloacid dehalogenase-like hydrolase domain containing 2 [Source:MGI Symbol;Acc:MGI:1924237]	protein_coding	-0.398081	8.37459e-05
	Pcdhgc5	protocadherin gamma subfamily C, 5 [Source:MGI Symbol;Acc:MGI:1935205]	protein_coding	-0.409692	0.00055997
	Me2	malic enzyme 2, NAD(+)-dependent, mitochondrial [Source:MGI Symbol;Acc:MGI:2147351]	protein_coding	-0.466355	0.00286381
	Garem1	GRB2 associated regulator of MAPK1 subtype 1 [Source:MGI Symbol;Acc:MGI:2685790]	protein_coding	-0.471717	0.00279457
	Jcad	junctional cadherin 5 associated [Source:MGI Symbol;Acc:MGI:2685174]	protein_coding	-0.556864	3.03096e-05
	Egr1	early growth response 1 [Source:MGI Symbol;Acc:MGI:95295]	protein_coding	-0.586212	3.36785e-07
	Mbp	myelin basic protein [Source:MGI Symbol;Acc:MGI:96925]	protein_coding	-0.635149	1.88252e-06
	Pcdhga3	protocadherin gamma subfamily A, 3 [Source:MGI Symbol;Acc:MGI:1935215]	protein_coding	-0.700573	0.00103441
	Rab27b	RAB27B, member RAS oncogene family [Source:MGI Symbol;Acc:MGI:1931295]	protein_coding	-0.715875	1.55247e-07
	Zfp236	zinc finger protein 236 [Source:MGI Symbol;Acc:MGI:1926950]	protein_coding	-0.806361	2.02763e-10
	Ino80c	INO80 complex subunit C [Source:MGI Symbol;Acc:MGI:2443014]	protein_coding	-0.806716	5.75945e-08
	Cd74	CD74 antigen (invariant polypeptide of major histocompatibility complex, class II antigen-associated) [Source:MGI Symbol;Acc:MGI:96534]	protein_coding	-0.814324	0.00158429
	Rprd1a	regulation of nuclear pre-mRNA domain containing 1A [Source:MGI Symbol;Acc:MGI:2385066]	protein_coding	-0.829204	2.27805e-14
	Pcdhb13	protocadherin beta 13 [Source:MGI Symbol;Acc:MGI:2136748]	protein_coding	-0.853972	0.00177123
	Aldh7a1	aldehyde dehydrogenase family 7, member A1 [Source:MGI Symbol;Acc:MGI:108186]	protein_coding	-0.991331	1.05885e-23
	Pcdhb5	protocadherin beta 5 [Source:MGI Symbol;Acc:MGI:2136739]	protein_coding	-1.02517	0.00043543
	Gnpda1	glucosamine-6-phosphate deaminase 1 [Source:MGI Symbol;Acc:MGI:1347054]	protein_coding	-1.39118	1.79818e-17
	Lipg	lipase, endothelial [Source:MGI Symbol;Acc:MGI:1341803]	protein_coding	-1.532	2.60384e-05
	Pcdha12	protocadherin alpha 12 [Source:MGI Symbol;Acc:MGI:1298370]	protein_coding	-1.86577	3.36256e-08
	Pcdhb9	protocadherin beta 9 [Source:MGI Symbol;Acc:MGI:2136744]	protein_coding	-1.86577	9.32673e-16
	Gm10524	predicted gene 10524 [Source:MGI Symbol;Acc:MGI:3642791]	TEC	-2.21707	2.01429e-11
	Pcdhb14	protocadherin beta 14 [Source:MGI Symbol;Acc:MGI:2136749]	protein_coding	-2.71752	6.14136e-16
	Pcdha7	protocadherin alpha 7 [Source:MGI Symbol;Acc:MGI:1298369]	protein_coding	-3.44402	1.83976e-07
	St8sia3os	ST8 alpha-N-acetyl-neuraminide alpha-2,8-sialyltransferase 3, opposite strand [Source:MGI Symbol;Acc:MGI:1920838]	antisense	-4.03626	2.43264e-07
19	Gm5514	predicted gene 5514 [Source:MGI Symbol;Acc:MGI:3645435]	processed_pseudogene	6.31215	2.40016e-59
	Mbl2	mannose-binding lectin (protein C) 2 [Source:MGI Symbol;Acc:MGI:96924]	protein_coding	5.90506	0.000121581
	Aldh3b2	aldehyde dehydrogenase 3 family, member B2 [Source:MGI Symbol;Acc:MGI:2147613]	protein_coding	4.14699	3.20676e-74
	Pyroxd2	pyridine nucleotide-disulphide oxidoreductase domain 2 [Source:MGI Symbol;Acc:MGI:1921830]	protein_coding	1.49035	3.8762e-07
	Ap5b1	adaptor-related protein complex 5, beta 1 subunit [Source:MGI Symbol;Acc:MGI:2685808]	protein_coding	1.06665	0.00026076
	Gm6563	predicted pseudogene 6563 [Source:MGI Symbol;Acc:MGI:3646907]	protein_coding	1.03554	1.23018e-06
	Sfxn4	sideroflexin 4 [Source:MGI Symbol;Acc:MGI:2137680]	protein_coding	0.83737	1.24081e-06
	Sema4g	sema domain, immunoglobulin domain (Ig), transmembrane domain (TM) and short cytoplasmic domain, (semaphorin) 4G [Source:MGI Symbol;Acc:MGI:1347047]	protein_coding	0.602468	0.000243593
	Catsperz	cation channel sperm associated auxiliary subunit zeta [Source:MGI Symbol;Acc:MGI:1914327]	protein_coding	0.597423	0.00156006
	As3mt	arsenic (+3 oxidation state) methyltransferase [Source:MGI Symbol;Acc:MGI:1929882]	protein_coding	0.578997	0.00132332
	Ehbp1l1	EH domain binding protein 1-like 1 [Source:MGI Symbol;Acc:MGI:3612340]	protein_coding	0.574564	4.58524e-07
	Ltbp3	latent transforming growth factor beta binding protein 3 [Source:MGI Symbol;Acc:MGI:1101355]	protein_coding	0.550952	1.57896e-05
	Mus81	MUS81 structure-specific endonuclease subunit [Source:MGI Symbol;Acc:MGI:1918961]	protein_coding	0.54283	6.48397e-05
	Bloc1s2	biogenesis of lysosomal organelles complex-1, subunit 2 [Source:MGI Symbol;Acc:MGI:1920939]	protein_coding	0.428858	0.000254339
	Arl2	ADP-ribosylation factor-like 2 [Source:MGI Symbol;Acc:MGI:1928393]	protein_coding	0.423042	0.000381861
	Rorb	RAR-related orphan receptor beta [Source:MGI Symbol;Acc:MGI:1343464]	protein_coding	0.395656	0.00110662
	Fam45a	family with sequence similarity 45, member A [Source:MGI Symbol;Acc:MGI:1915144]	protein_coding	0.381607	0.00159993
	Tmem132a	transmembrane protein 132A [Source:MGI Symbol;Acc:MGI:2147810]	protein_coding	0.345767	0.000583375
	Asrgl1	asparaginase like 1 [Source:MGI Symbol;Acc:MGI:1913764]	protein_coding	-0.295895	0.000442628
	Sh3pxd2a	SH3 and PX domains 2A [Source:MGI Symbol;Acc:MGI:1298393]	protein_coding	-0.359659	0.000983523
	Trub1	TruB pseudouridine (psi) synthase family member 1 [Source:MGI Symbol;Acc:MGI:1919383]	protein_coding	-0.432564	0.00170652
	Frmd8	FERM domain containing 8 [Source:MGI Symbol;Acc:MGI:1914707]	protein_coding	-0.459849	0.000563895
	Il33	interleukin 33 [Source:MGI Symbol;Acc:MGI:1924375]	protein_coding	-0.462255	0.000914104
	Btaf1	B-TFIID TATA-box binding protein associated factor 1 [Source:MGI Symbol;Acc:MGI:2147538]	protein_coding	-0.511151	0.000202236
	Pla2g16	phospholipase A2, group XVI [Source:MGI Symbol;Acc:MGI:2179715]	protein_coding	-0.547671	1.96922e-06
	Entpd1	ectonucleoside triphosphate diphosphohydrolase 1 [Source:MGI Symbol;Acc:MGI:102805]	protein_coding	-0.568856	0.00108697
	Frat1	frequently rearranged in advanced T cell lymphomas [Source:MGI Symbol;Acc:MGI:109450]	protein_coding	-0.593686	0.00123173
	Rbp4	retinol binding protein 4, plasma [Source:MGI Symbol;Acc:MGI:97879]	protein_coding	-0.656174	0.000231177
	Ide	insulin degrading enzyme [Source:MGI Symbol;Acc:MGI:96412]	protein_coding	-0.693356	2.6789e-09
	Stx3	syntaxin 3 [Source:MGI Symbol;Acc:MGI:103077]	protein_coding	-0.715197	1.95023e-07
	Cacul1	CDK2 associated, cullin domain 1 [Source:MGI Symbol;Acc:MGI:1926082]	protein_coding	-0.734307	7.0826e-12
	Opalin	oligodendrocytic myelin paranodal and inner loop protein [Source:MGI Symbol;Acc:MGI:2657025]	protein_coding	-0.802205	7.2536e-05
	Aldh18a1	aldehyde dehydrogenase 18 family, member A1 [Source:MGI Symbol;Acc:MGI:1888908]	protein_coding	-0.813316	4.27357e-09
	Ahnak	AHNAK nucleoprotein (desmoyokin) [Source:MGI Symbol;Acc:MGI:1316648]	protein_coding	-0.90881	4.35712e-09
	Prune2	prune homolog 2 [Source:MGI Symbol;Acc:MGI:1925004]	protein_coding	-0.94273	2.44423e-17
	Unc93b1	unc-93 homolog B1, TLR signaling regulator [Source:MGI Symbol;Acc:MGI:1859307]	protein_coding	-0.995368	4.33318e-09
	Acta2	actin, alpha 2, smooth muscle, aorta [Source:MGI Symbol;Acc:MGI:87909]	protein_coding	-1.01962	0.000370735
	Carnmt1	carnosine N-methyltransferase 1 [Source:MGI Symbol;Acc:MGI:1914633]	protein_coding	-1.06924	0.000102723
	Lipo3	lipase, member O3 [Source:MGI Symbol;Acc:MGI:2147592]	protein_coding	-1.15205	0.000254529
	Gucy2g	guanylate cyclase 2g [Source:MGI Symbol;Acc:MGI:106025]	protein_coding	-1.22468	1.94207e-06
	Mpeg1	macrophage expressed gene 1 [Source:MGI Symbol;Acc:MGI:1333743]	protein_coding	-1.22599	2.34383e-09
	Pik3ap1	phosphoinositide-3-kinase adaptor protein 1 [Source:MGI Symbol;Acc:MGI:1933177]	protein_coding	-1.3266	0.000284181
	Emx2os	Emx2 opposite strand/antisense transcript (non-protein coding) [Source:MGI Symbol;Acc:MGI:3052329]	antisense	-1.44456	1.19849e-05
	Aldh1a1	aldehyde dehydrogenase family 1, subfamily A1 [Source:MGI Symbol;Acc:MGI:1353450]	protein_coding	-1.49476	4.33532e-36
	Mirt1	myocardial infarction associated transcript 1 [Source:MGI Symbol;Acc:MGI:1922001]	lincRNA	-1.68477	0.00106777
	Tctn3	tectonic family member 3 [Source:MGI Symbol;Acc:MGI:1914840]	protein_coding	-1.68666	6.75192e-16
	Cd6	CD6 antigen [Source:MGI Symbol;Acc:MGI:103566]	protein_coding	-2.14661	5.23934e-06
	B230217O12Rik	RIKEN cDNA B230217O12 gene [Source:MGI Symbol;Acc:MGI:2444948]	lincRNA	-2.21204	5.97403e-27
	Gm6970	predicted gene 6970 [Source:MGI Symbol;Acc:MGI:3645322]	protein_coding	-3.21342	0.000165038
	Gm27042	predicted gene, 27042 [Source:MGI Symbol;Acc:MGI:5504157]	lincRNA	-4.61908	0.0025114
	4930481A15Rik	RIKEN cDNA 4930481A15 gene [Source:MGI Symbol;Acc:MGI:1922181]	antisense	-4.76521	5.49318e-08
	2410080I02Rik	RIKEN cDNA 2410080I02 gene [Source:MGI Symbol;Acc:MGI:1915498]	lincRNA	-6.05767	3.84891e-05
	A830019P07Rik	RIKEN cDNA A830019P07 gene [Source:MGI Symbol;Acc:MGI:3028035]	lincRNA	-6.50838	2.97177e-06
X	Rps2-ps13	ribosomal protein S2, pseudogene 13 [Source:MGI Symbol;Acc:MGI:3705640]	processed_pseudogene	13.2863	2.22789e-38
	Gm14719	predicted gene 14719 [Source:MGI Symbol;Acc:MGI:3705771]	processed_pseudogene	9.29538	1.10172e-14
	Gm5940	predicted gene 5940 [Source:MGI Symbol;Acc:MGI:3648847]	processed_pseudogene	7.42838	2.81029e-09
	Rps24-ps3	ribosomal protein S24, pseudogene 3 [Source:MGI Symbol;Acc:MGI:3644407]	processed_pseudogene	7.00015	8.26338e-57
	Gm1866	predicted gene 1866 [Source:MGI Symbol;Acc:MGI:3037724]	processed_pseudogene	6.36651	2.04675e-05
	Rpl3-ps2	ribosomal protein L3, pseudogene 2 [Source:MGI Symbol;Acc:MGI:3645345]	processed_pseudogene	5.92157	2.1592e-49
	Gm6472	predicted pseudogene 6472 [Source:MGI Symbol;Acc:MGI:3648396]	transcribed_processed_pseudogene	4.76291	2.48312e-81
	Gm15163	predicted gene 15163 [Source:MGI Symbol;Acc:MGI:3642430]	processed_pseudogene	4.17728	0.000184481
	Rpl3-ps1	ribosomal protein L3, pseudogene 1 [Source:MGI Symbol;Acc:MGI:3644217]	processed_pseudogene	3.96571	1.7482e-128
	Gm14681	predicted gene 14681 [Source:MGI Symbol;Acc:MGI:3705734]	processed_pseudogene	3.39893	2.5115e-07
	Gm6206	predicted pseudogene 6206 [Source:MGI Symbol;Acc:MGI:3644890]	processed_pseudogene	2.6492	1.68125e-08
	Srpx2	sushi-repeat-containing protein, X-linked 2 [Source:MGI Symbol;Acc:MGI:1916042]	protein_coding	2.11254	4.25334e-06
	Tmem255a	transmembrane protein 255A [Source:MGI Symbol;Acc:MGI:3045722]	protein_coding	0.773891	6.27575e-05
	Arxes1	adipocyte-related X-chromosome expressed sequence 1 [Source:MGI Symbol;Acc:MGI:1923469]	protein_coding	0.731018	1.21913e-06
	Pcdh11x	protocadherin 11 X-linked [Source:MGI Symbol;Acc:MGI:2442849]	protein_coding	0.695497	0.00147516
	Nsdhl	NAD(P) dependent steroid dehydrogenase-like [Source:MGI Symbol;Acc:MGI:1099438]	protein_coding	0.541406	6.07531e-05
	Rtl8a	retrotransposon Gag like 8A [Source:MGI Symbol;Acc:MGI:1913408]	protein_coding	0.507571	9.05983e-06
	Pnck	pregnancy upregulated non-ubiquitously expressed CaM kinase [Source:MGI Symbol;Acc:MGI:1347357]	protein_coding	0.439112	0.00394298
	Gspt2	G1 to S phase transition 2 [Source:MGI Symbol;Acc:MGI:1316727]	protein_coding	0.420077	0.000444632
	Prps1	phosphoribosyl pyrophosphate synthetase 1 [Source:MGI Symbol;Acc:MGI:97775]	protein_coding	0.372601	0.000188055
	Rtl8b	retrotransposon Gag like 8B [Source:MGI Symbol;Acc:MGI:3576504]	protein_coding	0.324086	0.00360509
	Tsr2	TSR2 20S rRNA accumulation [Source:MGI Symbol;Acc:MGI:1916749]	protein_coding	0.322037	0.00158345
	Nhsl2	NHS-like 2 [Source:MGI Symbol;Acc:MGI:3645090]	protein_coding	-0.353369	0.00232666
	Pls3	plastin 3 (T-isoform) [Source:MGI Symbol;Acc:MGI:104807]	protein_coding	-0.430989	4.05835e-05
	Pdk3	pyruvate dehydrogenase kinase, isoenzyme 3 [Source:MGI Symbol;Acc:MGI:2384308]	protein_coding	-0.467852	0.000571363
	Hmgb3	high mobility group box 3 [Source:MGI Symbol;Acc:MGI:1098219]	protein_coding	-0.488274	0.00187033
	Flna	filamin, alpha [Source:MGI Symbol;Acc:MGI:95556]	protein_coding	-0.49102	3.20614e-06
	Itm2a	integral membrane protein 2A [Source:MGI Symbol;Acc:MGI:107706]	protein_coding	-0.532585	6.67984e-06
	Rbm3	RNA binding motif (RNP1, RRM) protein 3 [Source:MGI Symbol;Acc:MGI:1099460]	protein_coding	-0.5997	4.43634e-05
	Fam3a	family with sequence similarity 3, member A [Source:MGI Symbol;Acc:MGI:1913544]	protein_coding	-0.614212	0.000289857
	Apln	apelin [Source:MGI Symbol;Acc:MGI:1353624]	protein_coding	-0.625871	4.83191e-05
	Trmt2b	TRM2 tRNA methyltransferase 2B [Source:MGI Symbol;Acc:MGI:2442530]	protein_coding	-0.627583	0.000666959
	Bex4	brain expressed X-linked 4 [Source:MGI Symbol;Acc:MGI:3606746]	protein_coding	-0.636646	0.00152771
	Diaph2	diaphanous related formin 2 [Source:MGI Symbol;Acc:MGI:1858500]	protein_coding	-0.670907	0.000117352
	Plp1	proteolipid protein (myelin) 1 [Source:MGI Symbol;Acc:MGI:97623]	protein_coding	-0.671991	2.60096e-07
	Mid1	midline 1 [Source:MGI Symbol;Acc:MGI:1100537]	protein_coding	-1.4617	0.000425554
	Chrdl1	chordin-like 1 [Source:MGI Symbol;Acc:MGI:1933172]	protein_coding	-1.48366	2.66352e-12
	Cldn34c1	claudin 34C1 [Source:MGI Symbol;Acc:MGI:1920311]	protein_coding	-3.91697	1.06553e-06
	Xlr3b	X-linked lymphocyte-regulated 3B [Source:MGI Symbol;Acc:MGI:109505]	protein_coding	-5.33458	0.000246428
	Gm15169	predicted gene 15169 [Source:MGI Symbol;Acc:MGI:3705215]	antisense	-5.71673	0.000175374
Y	Uty	ubiquitously transcribed tetratricopeptide repeat gene, Y chromosome [Source:MGI Symbol;Acc:MGI:894810]	protein_coding	0.721751	0.000128794
MT	mt-Nd3	mitochondrially encoded NADH dehydrogenase 3 [Source:MGI Symbol;Acc:MGI:102499]	protein_coding	-3.34239	2.37666e-59
	mt-Co2	mitochondrially encoded cytochrome c oxidase II [Source:MGI Symbol;Acc:MGI:102503]	protein_coding	1.19379	5.05512e-12
	mt-Nd4l	mitochondrially encoded NADH dehydrogenase 4L [Source:MGI Symbol;Acc:MGI:102497]	protein_coding	1.66709	3.87138e-10
	mt-Tg	mitochondrially encoded tRNA glycine [Source:MGI Symbol;Acc:MGI:102486]	Mt_tRNA	-7.16758	5.44838e-08
	mt-Tr	mitochondrially encoded tRNA arginine [Source:MGI Symbol;Acc:MGI:102476]	Mt_tRNA	-4.89818	0.00131832
GL456216.1	CAAA01118383.1	dehydrogenase/reductase (SDR family) X chromosome [Source:NCBI gene;Acc:236082]	protein_coding	-0.916824	5.74213e-05
